# Supplementary material for: Development of a Neurotensin-Derived 68Ga-Labeled PET Ligand with High In Vivo Stability for Imaging of NTS1 Receptor-Expressing Tumors
Source: MDPI journal article supplement (doi:10.3390/cancers14194922), 2022-10-08
Supplement: s1 [file s1]

# Development of a Neurotensin-Derived $^{68}\text{Ga}$ -Labeled PET Ligand with High In Vivo Stability for Imaging of NTS<sub>1</sub> Receptor-Expressing Tumors

Lisa Schindler, Jutta Moosbauer, Daniel Schmidt, Thilo Spruss, Lukas Grätz, Steffen Lüdeke, Frank Hofheinz, Sebastian Meister, Bernd Echtenacher, Günther Bernhardt, Jens Pietzsch, Dirk Hellwig and Max Keller

| Content                                                                                                                                          | Page |
|--------------------------------------------------------------------------------------------------------------------------------------------------|------|
| 1. Figures S1–S11 and Tables S1–S4                                                                                                               | S2   |
| 2. Synthesis protocols and analytical data of compounds 8, 9, 11, 12, 14-23, 25, 26, 28, 29 and 31-57                                            | S15  |
| 3. RP-HPLC chromatograms of compounds 8, 9, 11, 12, 14-23, 25, 26, 28, 29 and 31-57                                                              | S37  |
| 4. $^1\text{H}$ -NMR spectra of compounds 8, 9, 11, 12, 14-23, 25, 26, 28, 29 and 32-57, and $^{13}\text{C}$ -NMR spectra of compounds 50 and 51 | S52  |
| 5. References                                                                                                                                    | S76  |

# 1. Figures S1–S11 and Tables S1–S4.

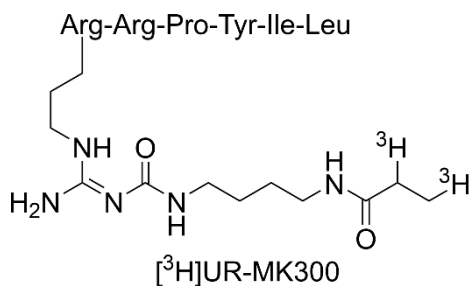

**Figure S1.** Structure of the tritium-labeled NT(8-13)-derived radioligand [<sup>3</sup>H]UR-MK300 used for NTS<sub>1</sub>R and NTS<sub>2</sub>R binding studies [1].

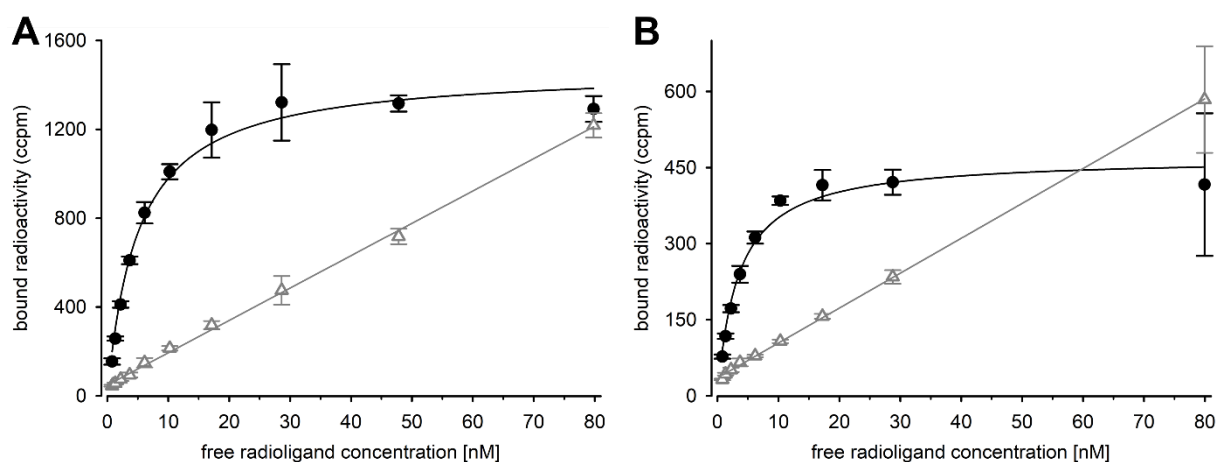

**Figure S2.** Representative saturation isotherms and unspecific binding curves from experiments with two batches of [<sup>3</sup>H]UR-MK300 at HEK293T-hNTS<sub>2</sub>R cells, giving  $K_d$  values of (A)  $6.9 \pm 1.8$  nM (mean value  $\pm$  SD from six independent determinations, each performed in triplicate) and (B)  $4.0 \pm 1.5$  nM (mean value  $\pm$  SD from three independent determinations, each performed in triplicate).

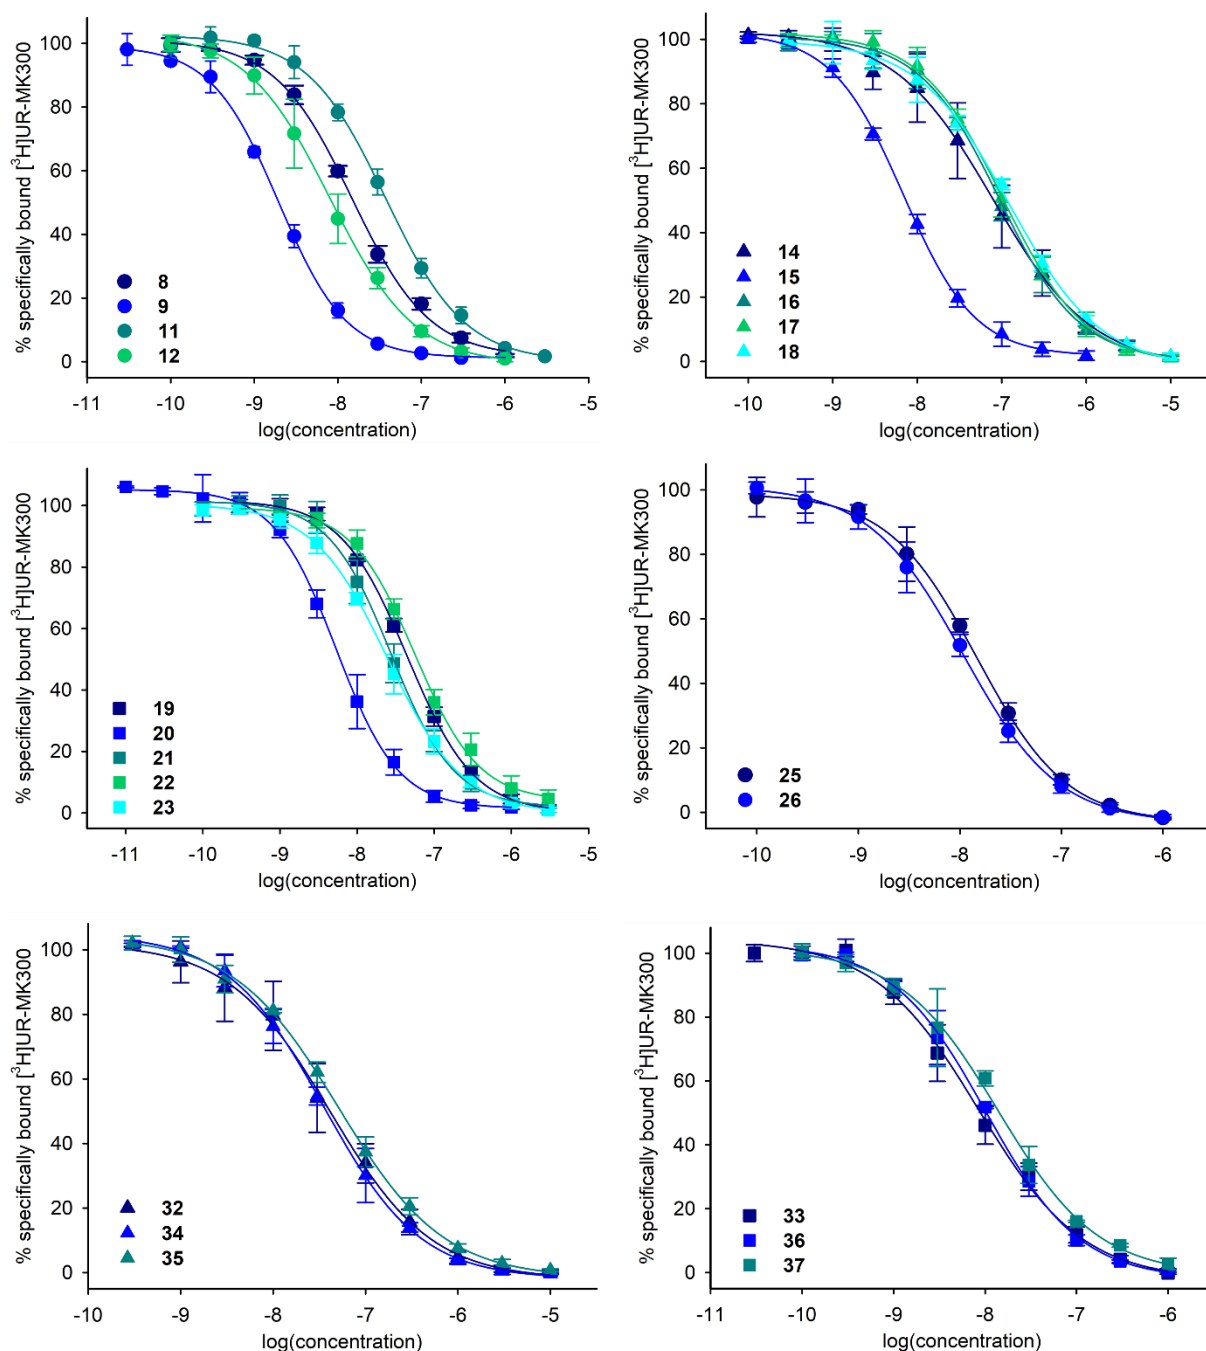

**Figure S3.** Radioligand displacement curves from competition binding experiments with [<sup>3</sup>H]UR-MK300 ( $K_d = 0.55$  nM or  $0.41$  nM,  $c = 1$  nM) and 8, 9, 11, 12, 14-23, 25, 26 and 32-37 at intact hNTS<sub>1</sub>R-expressing HT-29 cells. Amino-functionalized precursor peptides are represented by circles, DOTA-conjugated peptides are represented by triangles, and Ga<sup>3+</sup>-containing compounds are represented by squares. Data represent mean values  $\pm$  SD from at least two independent experiments (performed in triplicate).

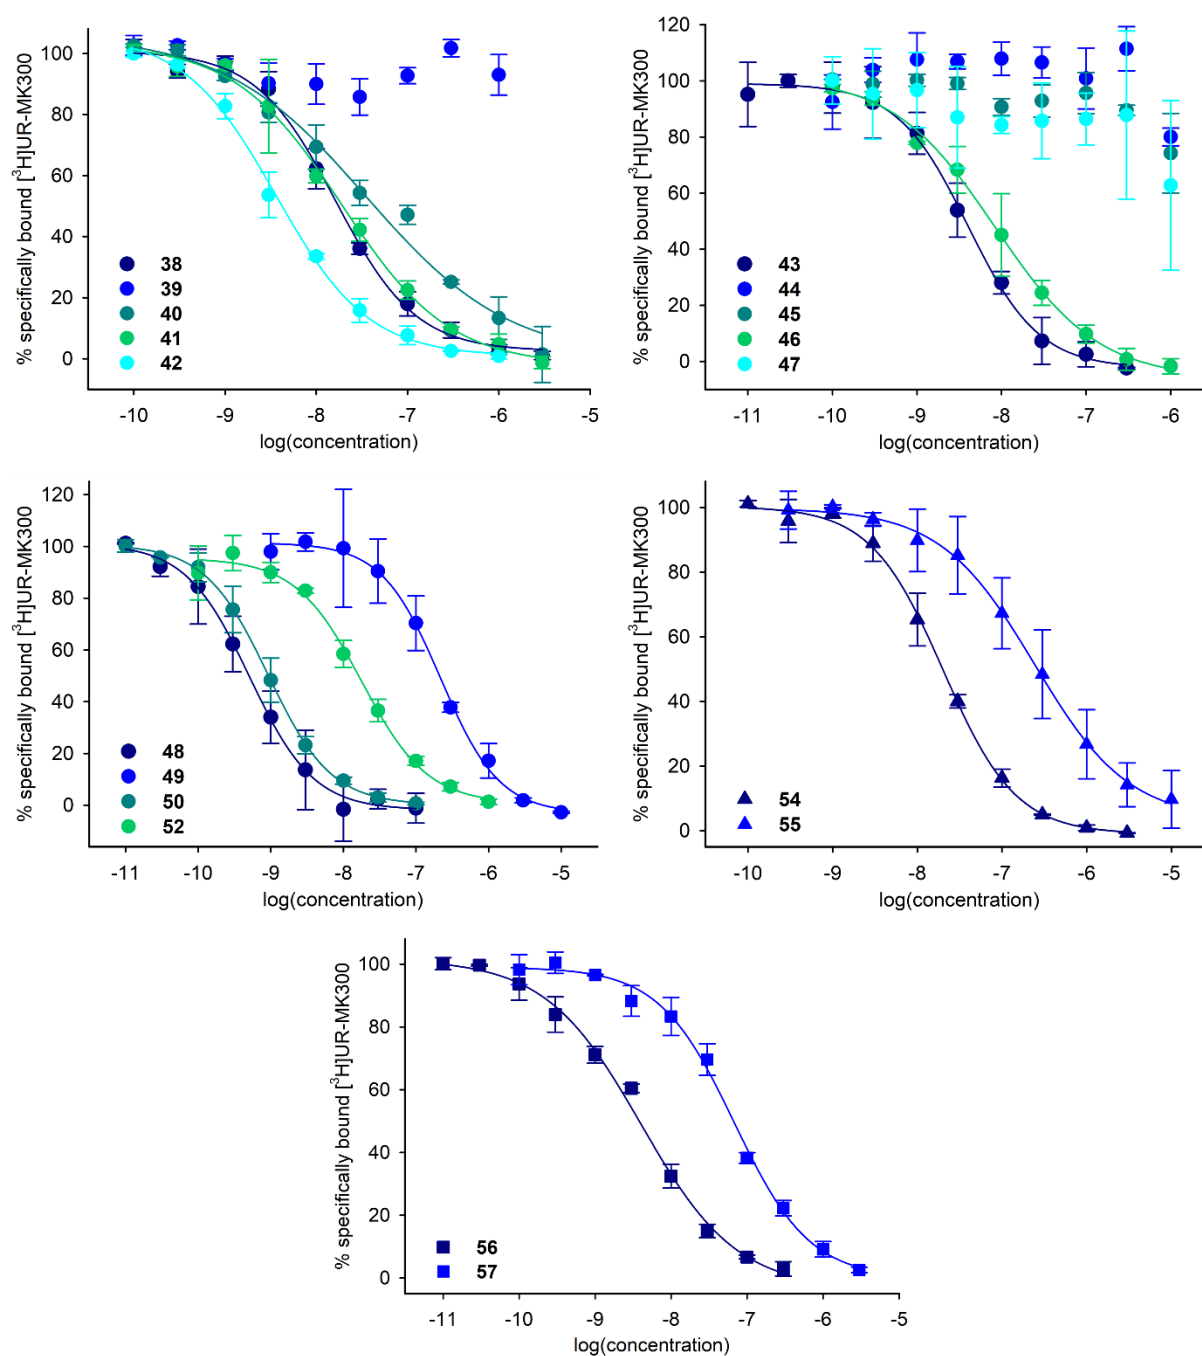

**Figure S4.** Radioligand displacement curves from competition binding experiments with [<sup>3</sup>H]UR-MK300 ( $K_d = 0.41$  nM,  $c = 1$  nM) and **38-50**, **52** and **54-57** at intact hNTS<sub>1</sub>R-expressing HT-29 cells. Amino-functionalized precursor peptides are represented by circles, DOTA-conjugated peptides are represented by triangles, and Ga<sup>3+</sup>-containing compounds are represented by squares. Data represent mean values  $\pm$  SD from at least two independent experiments (performed in triplicate).

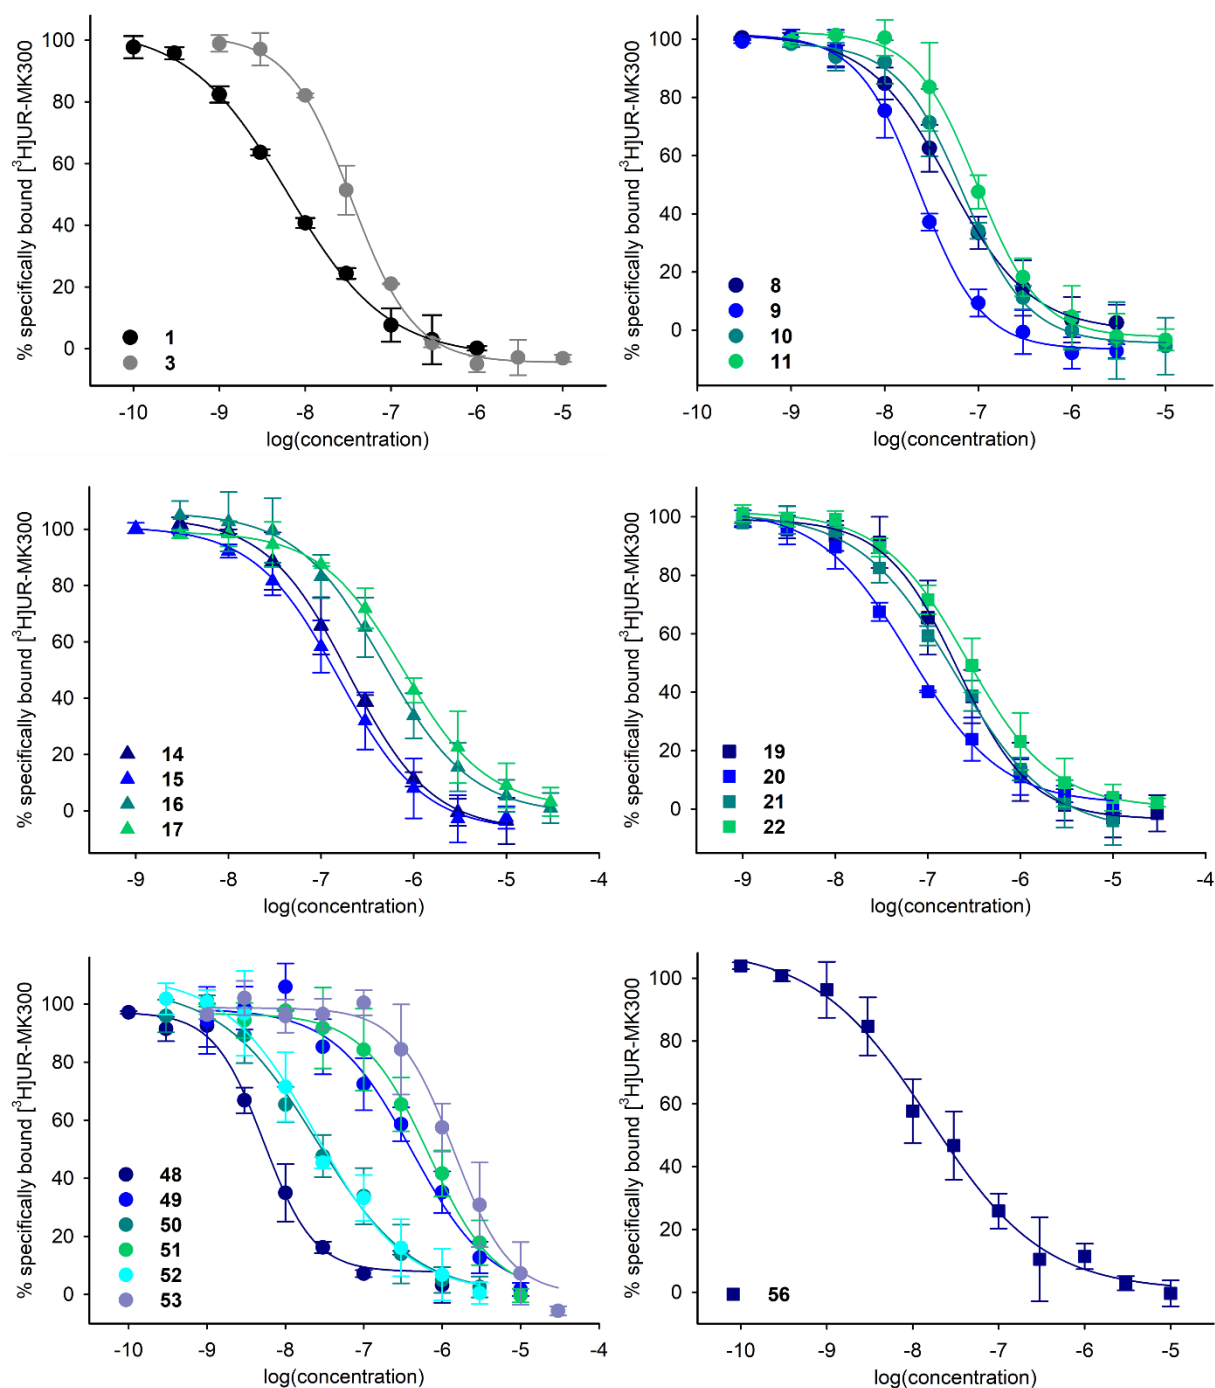

**Figure S5.** Radioligand displacement curves from competition binding experiments with [ $^3\text{H}$ ]UR-MK300 ( $K_d = 6.9$  nM or 4.0 nM,  $c = 10$  nM) and **1, 3, 8-11, 14-17, 19-22, 48-53** or **56** at intact HEK293T-hNTS<sub>2</sub>R cells. Reference compounds and amino-functionalized precursor peptides are represented by circles, DOTA-conjugated peptides are represented by triangles, and  $\text{Ga}^{3+}$ -containing compounds are represented by squares. Data represent mean values  $\pm$  SD from at least two independent experiments (performed in triplicate).

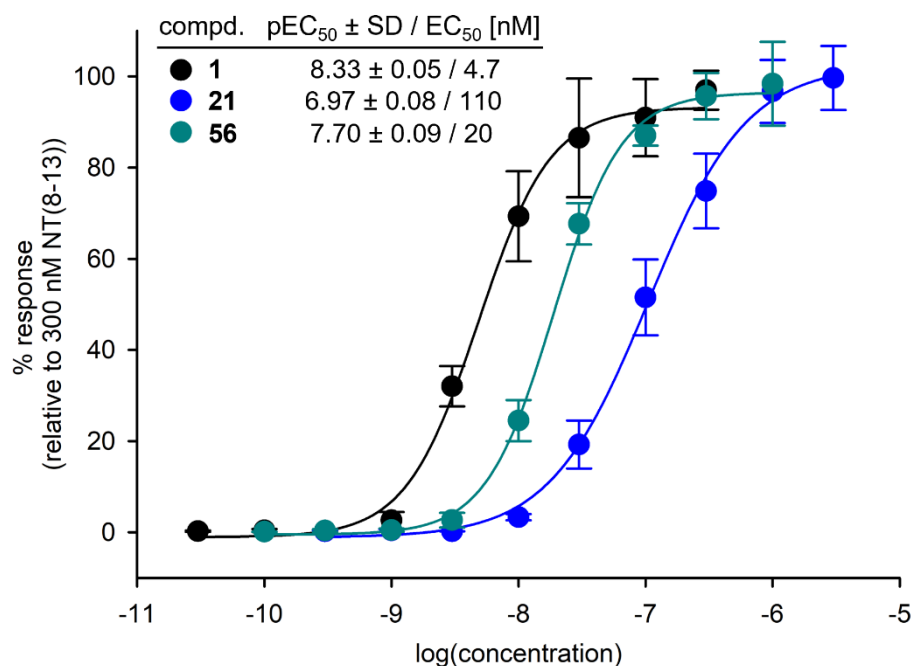

**Figure S6.** Concentration response curves and agonistic potencies (pEC<sub>50</sub>, EC<sub>50</sub>) of **1**, **21** and **56** from fura-2 Ca<sup>2+</sup>-assays using intact hNTS<sub>1</sub>R-expressing HT-29 cells. Data represent mean values ± SD from three or four independent experiments (performed in singlet).

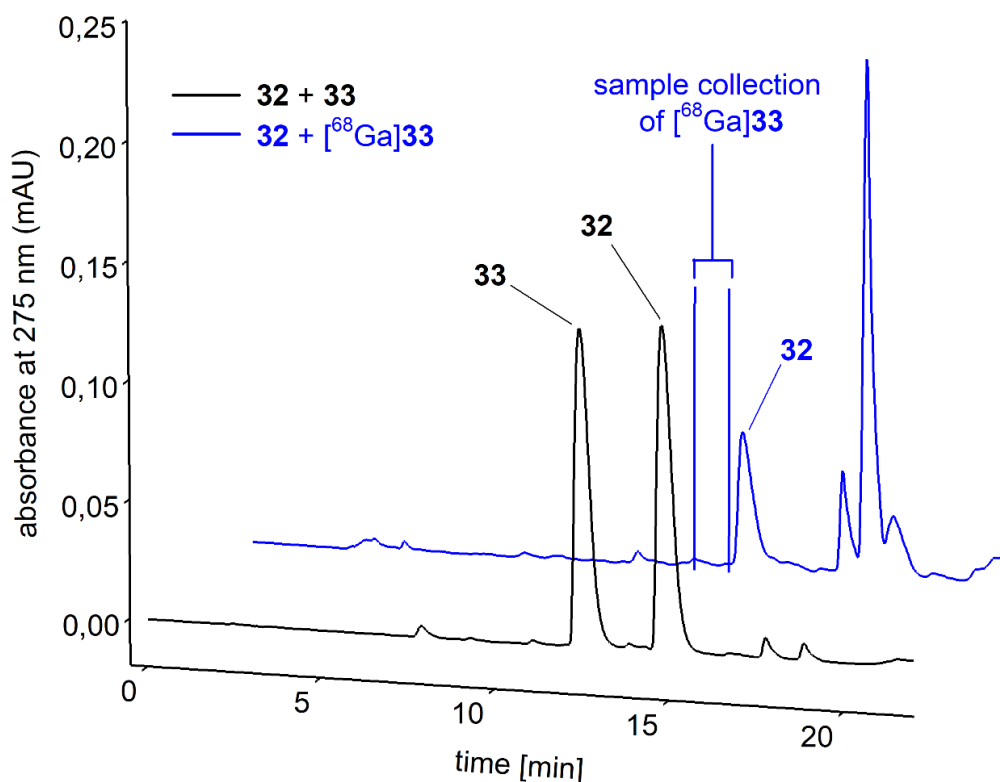

**Figure S7.** Chromatogram of the RP-HPLC analysis of a mixture of the labeling precursor **32** and the "cold" PET ligand **33** (50 µM each, injection volume 75 µL) (black line), and chromatogram of the preparative HPLC run for the separation of the PET tracer [<sup>68</sup>Ga]**33** from **32** after radiosynthesis (blue line). The vertical blue lines give the beginning and the end of tracer collection.

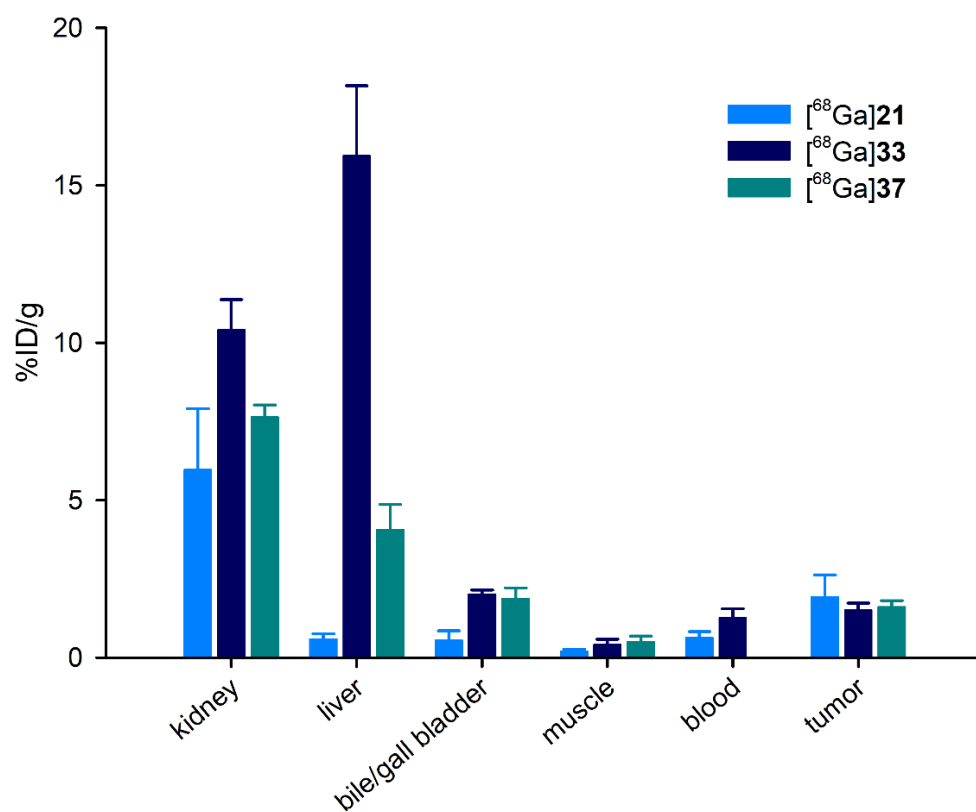

**Figure S8.** Biodistribution data (%ID/g tissue) of [<sup>68</sup>Ga]21, [<sup>68</sup>Ga]33 and [<sup>68</sup>Ga]37 from HT-29 tumor bearing mice. Given are mean values  $\pm$  SD (n = 3 ([<sup>68</sup>Ga]33, [<sup>68</sup>Ga]37) or n = 4 ([<sup>68</sup>Ga]21)) gained at 45 min p.i.

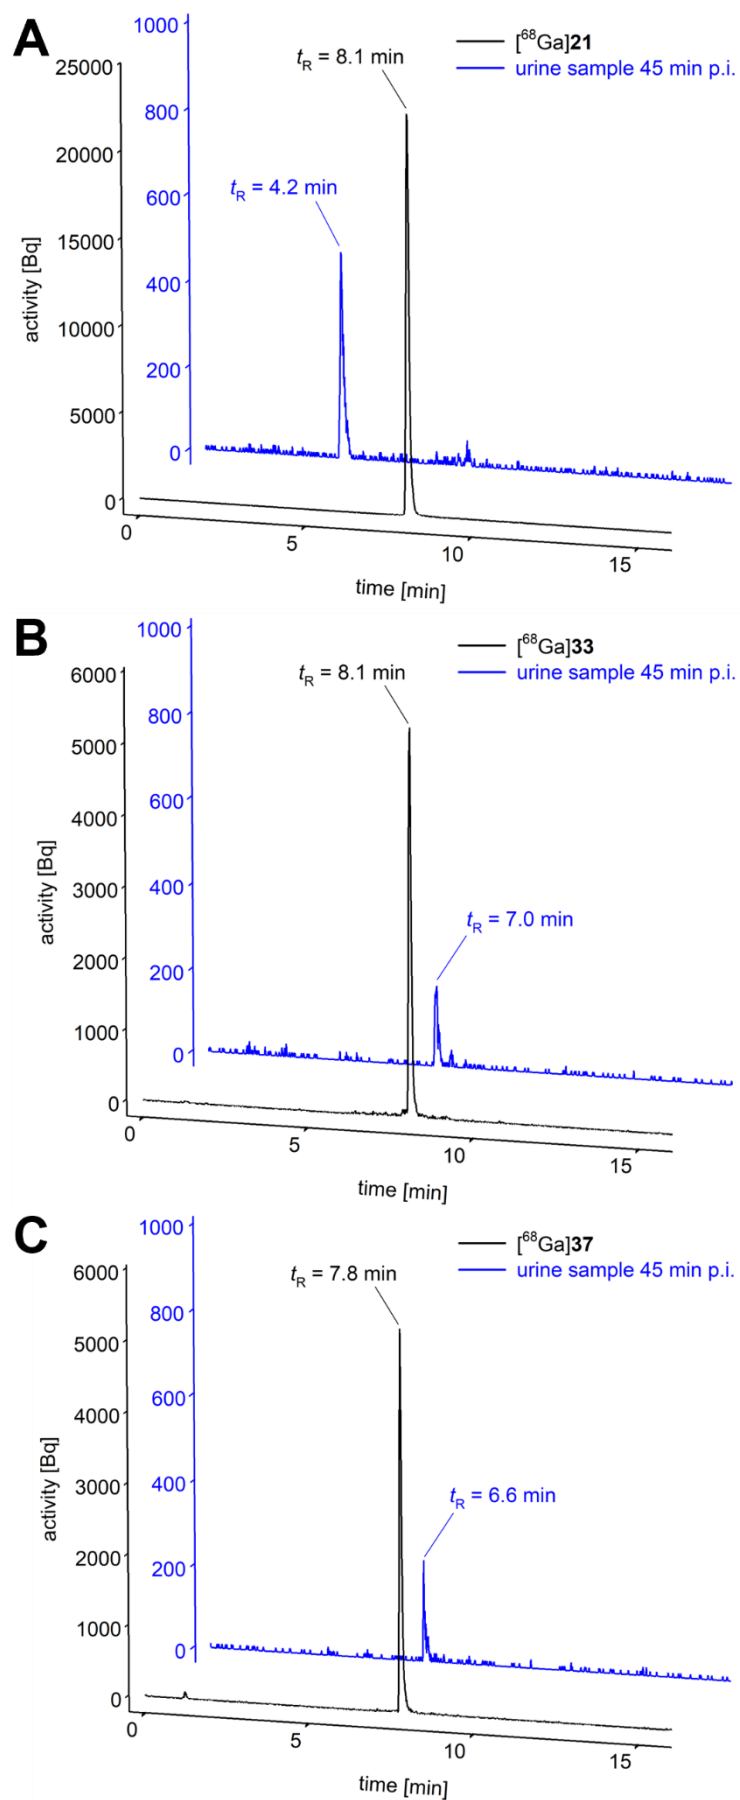

**Figure S9.** Representative chromatograms of the RP-HPLC quality controls of the PET tracers  $[^{68}\text{Ga}]\mathbf{21}$  (A),  $[^{68}\text{Ga}]\mathbf{33}$  (B) and  $[^{68}\text{Ga}]\mathbf{37}$  (C) after radiosynthesis (black lines) and of the RP-HPLC analyses of urine samples obtained from mice 45 min after injection of the respective PET tracers.



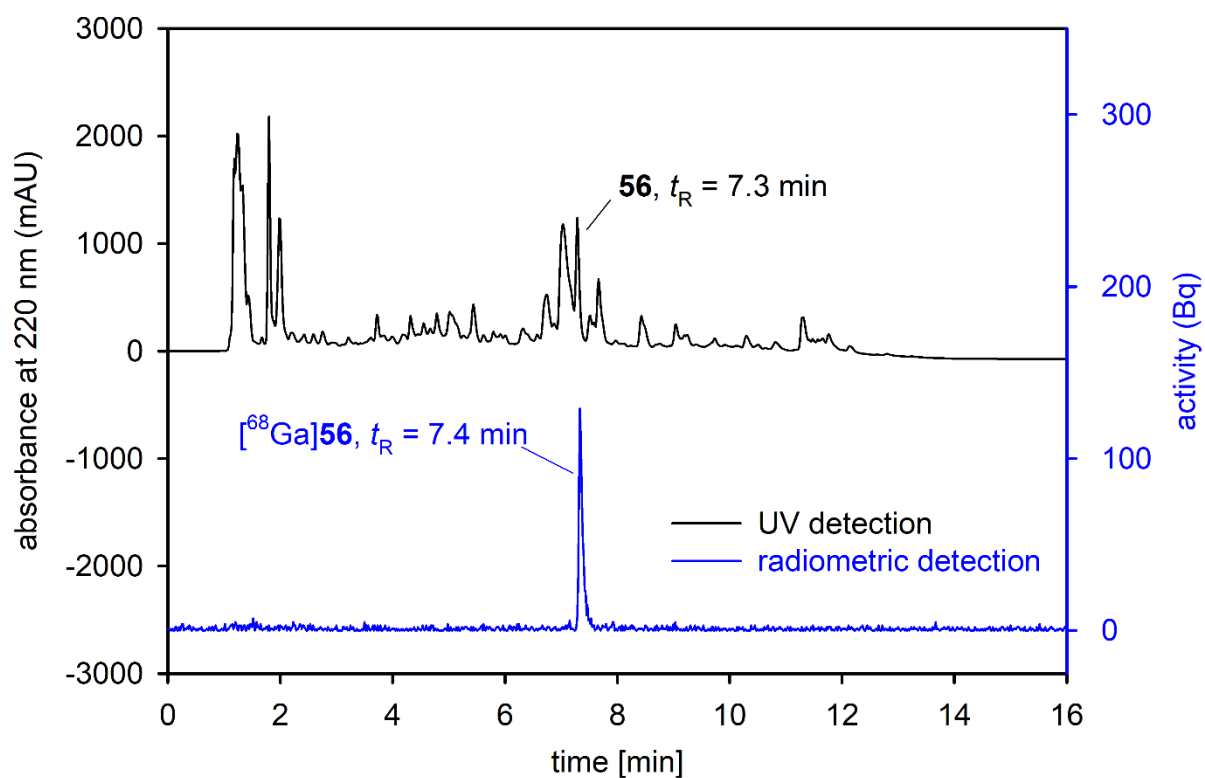

**Figure S10.** RP-HPLC analysis of an ex vivo urine sample from a mouse 45 min after injection of  $[^{68}\text{Ga}]\text{56}$ , spiked with **56** (100  $\mu\text{M}$ ). The blue line shows radiodetection and the black line shows UV detection at 220 nm.

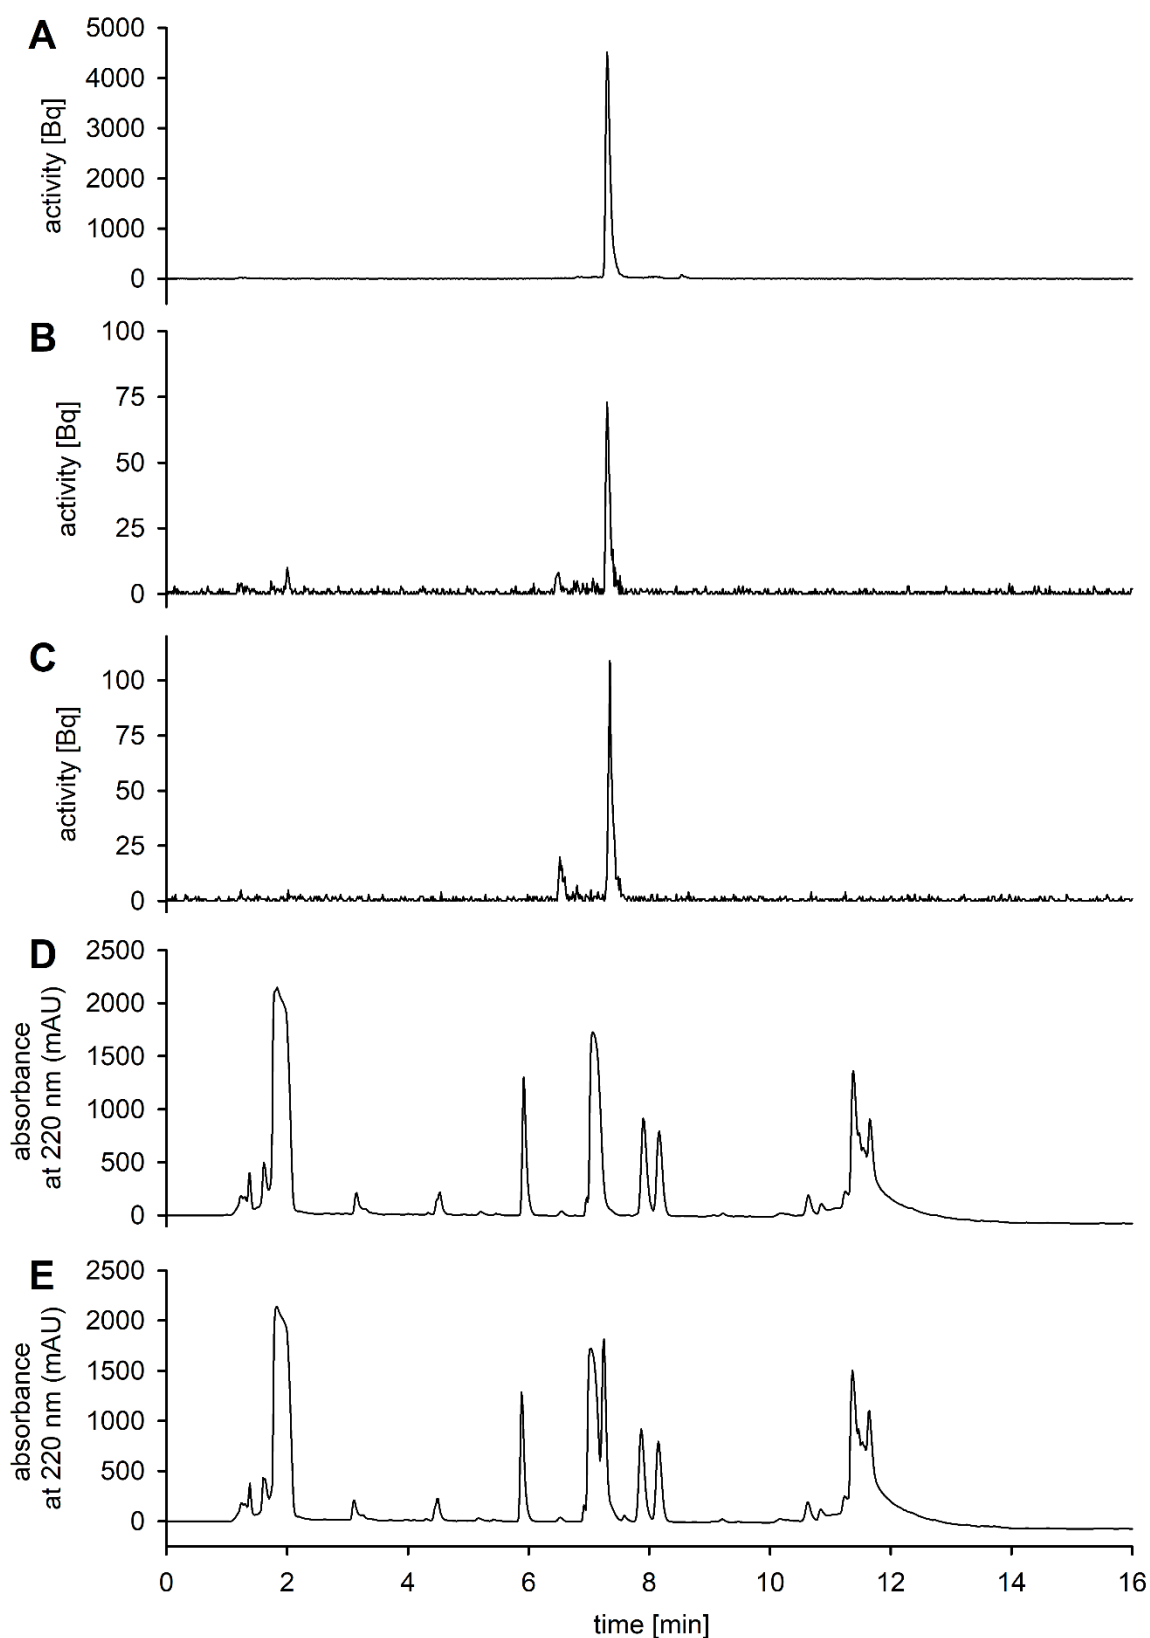

**Figure S11.** Chromatograms of the RP-HPLC analyses of different samples of [ $^{68}\text{Ga}$ ]**56** using radio- or UV-detection. (A) quality control after radiosynthesis; (B) ex vivo urine sample obtained from a mouse 10 min after injection of [ $^{68}\text{Ga}$ ]**56**; (C) ex vivo plasma sample (10 min p.i.) from the same mouse as under B; (D) UV-detection of the analysis from C; (E) plasma sample from C and D spiked with **56** (100  $\mu\text{M}$ ).

**Table S1.** Equivalents and conditions applied for SPPS.

| Fmoc-aa                                                           | equiv.<br>Fmoc-aa | equiv.<br>HBTU/HOBt/DIPEA | coupling conditions <sup>a</sup> |
|-------------------------------------------------------------------|-------------------|---------------------------|----------------------------------|
| Fmoc-Arg(Pbf)-OH                                                  | 5                 | 4.9/5/10                  | „double“, 35 °C                  |
| Fmoc-Pro-OH                                                       | 5                 | 4.9/5/10                  | „double“, 35 °C                  |
| Fmoc-Tyr( <i>t</i> Bu)-OH                                         | 5                 | 4.9/5/10                  | „double“, 35 °C                  |
| Fmoc-Ile-OH                                                       | 5                 | 4.9/5/10                  | „double“, 35 °C                  |
| Fmoc-Tle-OH (for <b>8</b> , <b>52</b> and <b>53</b> )             | 4                 | 3.95/4/8                  | „double“, 35 °C                  |
| Fmoc-Tle-OH (for <b>11</b> )                                      | 5                 |                           | „double“, 35 °C                  |
| Fmoc-Tle-OH (for <b>12</b> )                                      | 4.4               | 4.35/4.4/8.8              | „double“, 35 °C                  |
| Fmoc-N-Me-Arg(Pbf)-OH <sup>b</sup>                                | 3.5               | 3.45/3.5/7                | „double“, 35 °C                  |
| Fmoc-L-allo-Ile-OH <sup>b</sup>                                   | 5                 | 4.9/5/10                  | „double“, 35 °C                  |
| Fmoc-Deg-OH <sup>b</sup>                                          | 5                 | 4.9/5/10                  | „double“, 35 °C                  |
| Fmoc-L-cPrGly-OH <sup>b</sup>                                     | 5                 | 4.9/5/10                  | „double“, 35 °C                  |
| Fmoc- $\beta$ -cyclopropyl-L-Ala-OH <sup>b</sup>                  | 5                 | 4.9/5/10                  | „double“, 35 °C                  |
| Fmoc-( <i>S</i> )-2-amino-2-cyclobutylacetic acid <sup>b</sup>    | 5                 | 4.9/5/10                  | „double“, 35 °C                  |
| Fmoc- $\beta$ -cyclopentyl-L-Gly-OH <sup>b</sup>                  | 5                 | 4.9/5/10                  | „double“, 35 °C                  |
| ( <i>S</i> )-Fmoc- $\alpha$ -ethyl-Ala-OH <sup>b</sup>            | 5                 | 4.9/5/10                  | „double“, 35 °C                  |
| Fmoc- $\alpha$ -methyl-L-Leu-OH <sup>b</sup>                      | 3                 | 2.95/3/6                  | „double“, 35 °C                  |
| Fmoc- $\beta,\beta$ -diMe-Tyr( <i>t</i> Bu)-OH (rac) <sup>b</sup> | 3                 | 2.95/3/6                  | „double“, 35 °C                  |
| <b>6</b> (for <b>8</b> and <b>9</b> ) <sup>b</sup>                | 3                 | 3/3/6                     | “single”, 14 h, 35 °C            |
| <b>6</b> (for <b>11</b> ) <sup>b</sup>                            | 3                 |                           | “single”, 14 h, 35 °C            |
| <b>6</b> (for <b>50-53</b> ) <sup>b</sup>                         | 3                 | 3/3/6                     | „double“, 35 °C                  |
| <b>7</b> <sup>b</sup>                                             | 2.6               | 2.6/2.6/5.2               | “single”, 14 h, 35 °C            |

<sup>a</sup>In the case of “double coupling”, the length of one coupling step varied between 45 min and overnight.

<sup>b</sup>Anhydrous DMF and NMP was used for the coupling reactions.

**Table S2.** Recoveries of peptides **8**, **9**, **11**, **12**, **14-23** and **54-57** from human plasma/PBS (1:2 v/v) and ratios of peptide-recovery over recovery of IS.

| Compd.   | Peptide concentration 80 $\mu$ M  |                              |                    | Peptide concentration 4 $\mu$ M   |                              |                    |
|----------|-----------------------------------|------------------------------|--------------------|-----------------------------------|------------------------------|--------------------|
|          | recovery peptide (%) <sup>a</sup> | recovery IS (%) <sup>a</sup> | ratio <sup>b</sup> | recovery peptide (%) <sup>a</sup> | recovery IS (%) <sup>a</sup> | ratio <sup>b</sup> |
| <b>8</b> | 82                                | 98                           | 0.84               | 103                               | 98                           | 1.05               |
|          | 84                                | 102                          | 0.83               | 103                               | 102                          | 1.00               |
|          | 82                                | 96                           | 0.86               | 100                               | 100                          | 1.01               |
|          |                                   |                              |                    | 106                               | 102                          | 1.04               |
|          |                                   |                              | (0.84 $\pm$ 0.02)  |                                   |                              | (1.03 $\pm$ 0.02)  |
| <b>9</b> | 90                                | 103                          | 0.87               | 92                                | 101                          | 0.90               |
|          | 85                                | 99                           | 0.86               | 92                                | 109                          | 0.85               |
|          | 86                                | 98                           | 0.88               | 88                                | 100                          | 0.88               |
|          | 83                                | 97                           | 0.86               | 96                                | 113                          | 0.85               |
|          | 85                                | 96                           | 0.89               |                                   |                              |                    |
|          |                                   |                              | (0.87 $\pm$ 0.01)  |                                   |                              | (0.87 $\pm$ 0.03)  |

**Table S2** continued

|           |     |     |               |     |               |      |
|-----------|-----|-----|---------------|-----|---------------|------|
| <b>11</b> | 90  | 104 | 0.87          | 98  | 96            | 1.02 |
|           | 89  | 105 | 0.84          | 101 | 103           | 0.98 |
|           | 90  | 106 | 0.85          | 101 | 99            | 1.02 |
|           | 91  | 106 | 0.86          | 98  | 99            | 1.00 |
|           | 88  | 99  | 0.89          | 96  | 96            | 1.00 |
|           |     |     | (0.86 ± 0.02) |     | (1.00 ± 0.02) |      |
| <b>12</b> | 90  | 95  | 0.95          | 109 | 101           | 1.07 |
|           | 99  | 110 | 0.90          | 111 | 100           | 1.12 |
|           | 95  | 104 | 0.92          | 107 | 97            | 1.10 |
|           | 90  | 97  | 0.93          | 109 | 100           | 1.10 |
|           | 89  | 98  | 0.91          |     |               |      |
|           |     |     | (0.92 ± 0.02) |     | (1.09 ± 0.02) |      |
| <b>14</b> | 93  | 101 | 0.92          | 96  | 103           | 0.93 |
|           | 79  | 84  | 0.94          | 90  | 99            | 0.91 |
|           | 82  | 89  | 0.92          | 90  | 98            | 0.92 |
|           |     |     |               | 94  | 105           | 0.90 |
|           |     |     | (0.93 ± 0.01) |     | (0.91 ± 0.01) |      |
| <b>15</b> | 89  | 96  | 0.93          | 73  | 94            | 0.77 |
|           | 90  | 104 | 0.87          | 80  | 103           | 0.78 |
|           | 84  | 98  | 0.86          | 79  | 105           | 0.76 |
|           | 84  | 99  | 0.84          |     |               |      |
|           | 86  | 95  | 0.91          |     |               |      |
|           |     |     | (0.88 ± 0.04) |     | (0.77 ± 0.01) |      |
| <b>16</b> | 93  | 96  | 0.97          | 99  | 103           | 0.97 |
|           | 102 | 107 | 0.95          | 108 | 110           | 0.99 |
|           | 106 | 109 | 0.97          | 99  | 100           | 0.98 |
|           | 99  | 103 | 0.96          | 107 | 113           | 0.95 |
|           |     |     |               | 102 | 109           | 0.94 |
|           |     |     | (0.96 ± 0.01) |     | (0.97 ± 0.02) |      |
| <b>17</b> | 84  | 88  | 0.96          | 123 | 88            | 1.40 |
|           | 86  | 87  | 0.99          | 129 | 88            | 1.46 |
|           | 85  | 88  | 0.96          | 121 | 82            | 1.48 |
|           | 86  | 86  | 1.01          | 130 | 90            | 1.44 |
|           | 85  | 89  | 0.96          | 124 | 84            | 1.47 |
|           |     |     | (0.97 ± 0.02) |     | (1.45 ± 0.03) |      |
| <b>18</b> | 108 | 118 | 0.92          | 104 | 99            | 1.05 |
|           | 104 | 110 | 0.94          | 105 | 103           | 1.02 |
|           | 99  | 107 | 0.93          | 114 | 108           | 1.06 |
|           | 105 | 112 | 0.95          | 103 | 100           | 1.03 |
|           | 105 | 110 | 0.95          |     |               |      |
|           |     |     | (0.94 ± 0.01) |     | (1.04 ± 0.02) |      |
| <b>19</b> | 91  | 112 | 0.81          | 112 | 111           | 1.01 |
|           | 88  | 110 | 0.80          | 110 | 102           | 1.07 |
|           | 86  | 108 | 0.80          | 112 | 102           | 1.10 |
|           | 86  | 105 | 0.82          | 112 | 109           | 1.03 |
|           |     |     | (0.81 ± 0.01) |     | (1.05 ± 0.04) |      |
| <b>20</b> | 103 | 123 | 0.84          | 102 | 103           | 0.99 |
|           | 111 | 134 | 0.82          | 98  | 102           | 0.96 |
|           | 99  | 114 | 0.87          | 102 | 100           | 1.02 |
|           | 90  | 107 | 0.85          | 108 | 108           | 1.00 |
|           | 102 | 119 | 0.86          |     |               |      |
|           |     |     | (0.85 ± 0.02) |     | (0.99 ± 0.03) |      |

**Table S2** continued

|           |     |     |               |     |               |      |
|-----------|-----|-----|---------------|-----|---------------|------|
| <b>21</b> | 98  | 108 | 0.91          | 115 | 99            | 1.16 |
|           | 92  | 104 | 0.89          | 120 | 105           | 1.14 |
|           | 97  | 108 | 0.90          | 118 | 105           | 1.13 |
|           | 91  | 100 | 0.91          | 120 | 101           | 1.19 |
|           | 89  | 102 | 0.88          | 112 | 101           | 1.11 |
|           |     |     | (0.90 ± 0.02) |     | (1.15 ± 0.03) |      |
| <b>22</b> | 80  | 89  | 0.89          | 96  | 83            | 1.16 |
|           | 81  | 91  | 0.89          | 90  | 86            | 1.06 |
|           | 76  | 86  | 0.88          | 100 | 89            | 1.13 |
|           | 77  | 84  | 0.91          | 100 | 90            | 1.11 |
|           |     |     | (0.89 ± 0.01) |     | (1.11 ± 0.04) |      |
| <b>23</b> | 88  | 100 | 0.87          | 112 | 111           | 1.01 |
|           | 96  | 105 | 0.91          | 98  | 96            | 1.02 |
|           | 97  | 109 | 0.89          | 107 | 105           | 1.02 |
|           | 104 | 119 | 0.88          | 106 | 103           | 1.03 |
|           | 98  | 109 | 0.90          |     |               |      |
|           |     |     | (0.89 ± 0.02) |     | (1.02 ± 0.01) |      |
| <b>54</b> | 90  | 97  | 0.94          | 96  | 96            | 1.00 |
|           | 90  | 96  | 0.94          | 100 | 99            | 1.01 |
|           | 94  | 97  | 0.98          | 106 | 99            | 1.07 |
|           | 89  | 93  | 0.95          | 107 | 109           | 0.98 |
|           | 91  | 99  | 0.92          | 103 | 95            | 1.09 |
|           |     |     | (0.94 ± 0.02) |     | (1.03 ± 0.05) |      |
| <b>55</b> | 91  | 96  | 0.95          | 97  | 96            | 1.01 |
|           | 102 | 105 | 0.97          | 99  | 101           | 0.99 |
|           | 88  | 91  | 0.96          | 102 | 106           | 0.96 |
|           | 89  | 94  | 0.95          | 94  | 94            | 0.99 |
|           |     |     |               | 103 | 100           | 1.02 |
|           |     |     | (0.96 ± 0.01) |     | (0.99 ± 0.02) |      |
| <b>56</b> | 94  | 103 | 0.92          | 99  | 100           | 0.99 |
|           | 84  | 94  | 0.89          | 100 | 93            | 1.07 |
|           | 91  | 101 | 0.91          | 101 | 97            | 1.04 |
|           | 87  | 96  | 0.91          | 109 | 107           | 1.01 |
|           | 90  | 99  | 0.91          | 105 | 107           | 0.98 |
|           |     |     | (0.91 ± 0.01) |     | (1.02 ± 0.04) |      |
| <b>57</b> | 85  | 97  | 0.88          | 104 | 105           | 0.99 |
|           | 83  | 91  | 0.91          | 96  | 95            | 1.01 |
|           | 90  | 98  | 0.92          | 100 | 102           | 0.98 |
|           | 88  | 92  | 0.96          | 94  | 95            | 0.99 |
|           | 100 | 106 | 0.94          | 91  | 90            | 1.01 |
|           |     |     | (0.92 ± 0.03) |     | (1.00 ± 0.02) |      |

<sup>a</sup>Recoveries of the peptides and of IS from human plasma/PBS (1:2 v/v) using a peptide concentration of 80 µM or 4 µM and an IS concentration of 10 µM (three, four or five independent experiments). <sup>b</sup>Ratios of peptide recovery over recovery of the IS calculated for individual experiments, as well as mean recovery ratios ± SD (given in parenthesis). Note: When the remaining intact peptide concentration in plasma was > 20 µM, recovery ratios based on the 80 µM peptide concentrations were used to calculate peptide recoveries of the plasma stability samples. When the remaining intact peptide concentration was < 20 µM, recovery ratios based on the 4 µM peptide concentrations were used to calculate peptide recoveries of the plasma stability samples.

**Table S3.** NTS<sub>1</sub>R affinities of **8-12, 14-18, 25, 26, 32, 34, 35, 38-50, 52, 54** and **55**, NTS<sub>2</sub>R affinities of **8-11, 14-17** and **48-53**, NTS<sub>1</sub>R selectivities of **8-11, 14-17, 48-50** and **52**, and in vitro plasma stabilities of **8-12, 14-18, 38-49, 54** and **55**, determined at 37 °C.

| cpd. | pK <sub>i</sub> ± SD / | pK <sub>i</sub> ± SD / | NTS <sub>1</sub> R selectivity | % intact peptide in plasma after the |
|------|------------------------|------------------------|--------------------------------|--------------------------------------|
|------|------------------------|------------------------|--------------------------------|--------------------------------------|

|    | $K_i$ [nM]<br>NTS <sub>1</sub> R <sup>a</sup> | $K_i$ [nM]<br>NTS <sub>2</sub> R <sup>b</sup> | (ratio $K_i$ (NTS <sub>2</sub> R) /<br>$K_i$ (NTS <sub>1</sub> R)) | given incubation time <sup>c</sup> |                   |                   |                   |
|----|-----------------------------------------------|-----------------------------------------------|--------------------------------------------------------------------|------------------------------------|-------------------|-------------------|-------------------|
|    |                                               |                                               |                                                                    | 1 h                                | 6 h               | 24 h              | 48 h              |
| 8  | 8.28 ± 0.05 / 5.3                             | 7.68 ± 0.11 / 22                              | 4.2                                                                | > 99                               | > 99              | > 99              | > 99              |
| 9  | 9.16 ± 0.02 / 0.69                            | 8.10 ± 0.19 / 8.3                             | 12                                                                 | 99 ± 2                             | 57 ± 2            | 3.0 ± 0.1         | 1.4 ± 0.3         |
| 10 | 8.55 / 2.8 <sup>d</sup>                       | 7.72 ± 0.09 / 19                              | 6.8                                                                | > 99 <sup>d</sup>                  | > 99 <sup>d</sup> | > 99 <sup>d</sup> | > 99 <sup>d</sup> |
| 11 | 7.88 ± 0.04 / 13                              | 7.57 ± 0.10 / 27                              | 2.1                                                                | > 99                               | > 99              | > 99              | > 99              |
| 12 | 8.61 ± 0.23 / 2.7                             | n.d.                                          | -                                                                  | 97 ± 3                             | 97 ± 3            | 94 ± 3            | 91 ± 3            |
| 14 | 7.66 ± 0.39 / 28                              | 7.11 ± 0.07 / 79                              | 2.8                                                                | > 99                               | > 99              | > 99              | > 99              |
| 15 | 8.62 ± 0.005 / 2.4                            | 7.27 ± 0.10 / 55                              | 23                                                                 | 78 ± 1                             | 8.3 ± 0.4         | < 1               | < 1               |
| 16 | 7.48 ± 0.02 / 33                              | 6.86 ± 0.25 / 150                             | 4.5                                                                | > 99                               | > 99              | 93 ± 3            | 84 ± 2            |
| 17 | 7.45 ± 0.09 / 36                              | 6.65 ± 0.10 / 230                             | 6.4                                                                | 97 ± 1                             | 99 ± 1            | 98 ± 1            | 97 ± 1            |
| 18 | 7.45 ± 0.07 / 36                              | n.d.                                          | -                                                                  | > 99                               | 99 ± 1            | 94 ± 1            | 86 ± 1            |
| 25 | 8.37 ± 0.08 / 4.3                             | n.d.                                          | -                                                                  | n.d.                               | n.d.              | n.d.              | n.d.              |
| 26 | 8.52 ± 0.11 / 3.1                             | n.d.                                          | -                                                                  | n.d.                               | n.d.              | n.d.              | n.d.              |
| 32 | 7.97 ± 0.19 / 12                              | n.d.                                          | -                                                                  | n.d.                               | n.d.              | n.d.              | n.d.              |
| 34 | 7.99 ± 0.06 / 10                              | n.d.                                          | -                                                                  | n.d.                               | n.d.              | n.d.              | n.d.              |
| 35 | 7.87 ± 0.12 / 14                              | n.d.                                          | -                                                                  | n.d.                               | n.d.              | n.d.              | n.d.              |
| 38 | 8.33 ± 0.06 / 4.8                             | n.d.                                          | -                                                                  | 92 ± 1                             | 87 ± 1            | 70 ± 1            | 52 ± 1            |
| 39 | < 6 / > 1000                                  | n.d.                                          | -                                                                  | 93 ± 1                             | 94 ± 1            | 93 ± 1            | 93 ± 1            |
| 40 | 8.05 ± 0.21 / 9.6                             | n.d.                                          | -                                                                  | 88 ± 1                             | 58 ± 1            | < 1               | < 1               |
| 41 | 8.31 ± 0.12 / 5.0                             | n.d.                                          | -                                                                  | 92 ± 1                             | 74 ± 1            | 15 ± 1            | < 1               |
| 42 | 8.98 ± 0.05 / 1.1                             | n.d.                                          | -                                                                  | 91 ± 1                             | 79 ± 1            | 32 ± 1            | < 1               |
| 43 | 8.92 ± 0.09 / 1.2                             | n.d.                                          | -                                                                  | 99 ± 1                             | 95 ± 1            | 78 ± 1            | 58 ± 1            |
| 44 | < 6 / > 1000                                  | n.d.                                          | -                                                                  | 94 ± 1                             | 91 ± 4            | 91 ± 1            | 87 ± 1            |
| 45 | < 6 / > 1000                                  | n.d.                                          | -                                                                  | 93 ± 1                             | 92 ± 1            | 86 ± 1            | 77 ± 1            |
| 46 | 8.63 ± 0.22 / 2.6                             | n.d.                                          | -                                                                  | 25 ± 2                             | < 1               | < 1               | < 1               |
| 47 | < 6 / > 1000                                  | n.d.                                          | -                                                                  | 89 ± 1                             | 88 ± 1            | 81 ± 1            | 73 ± 1            |
| 48 | 9.86 ± 0.17 / 0.14                            | 8.82 ± 0.07 / 1.5                             | 11                                                                 | 90 ± 4                             | 97 ± 6            | 92 ± 1            | 92 ± 1            |
| 49 | 7.25 ± 0.06 / 56                              | 6.95 ± 0.12 / 110                             | 2.0                                                                | 96 ± 2                             | 96 ± 1            | 94 ± 5            | 95 ± 2            |
| 50 | 9.60 ± 0.12 / 0.26                            | 8.23 ± 0.28 / 6.8                             | 26                                                                 | n.d.                               | n.d.              | n.d.              | n.d.              |
| 51 | n.d.                                          | 6.76 ± 0.07 / 170                             | -                                                                  | n.d.                               | n.d.              | n.d.              | n.d.              |
| 52 | 8.30 ± 0.21 / 5.4                             | 8.22 ± 0.22 / 6.5                             | 1.2                                                                | n.d.                               | n.d.              | n.d.              | n.d.              |
| 53 | n.d.                                          | 6.40 ± 0.24 / 450                             | -                                                                  | n.d.                               | n.d.              | n.d.              | n.d.              |
| 54 | 8.23 ± 0.08 / 5.9                             | n.d.                                          | -                                                                  | > 99                               | > 99              | > 99              | > 99              |
| 55 | 7.10 ± 0.20 / 85                              | n.d.                                          | -                                                                  | > 99                               | > 99              | > 99              | > 99              |

<sup>a</sup>Determined by radioligand competition binding with [<sup>3</sup>H]UR-MK300 at HT-29 cells ( $K_d$  = 0.55 nM [2] or 0.41 nM,  $c$  = 1 nM); given are mean values ± SD ( $pK_i$ ) and mean values ( $K_i$ ) from two (8, 15, 42), three (9, 11, 16, 17, 25, 32, 34, 38, 40, 41, 43, 46, 48-50, 52, 54, 55), four (12, 18, 26, 35) or five (14) independent experiments, each performed in triplicate. <sup>b</sup>Determined by radioligand competition binding with [<sup>3</sup>H]UR-MK300 at HEK293T-hNTS<sub>2</sub>R cells ( $K_d$  = 6.9 nM or 4.0 nM,  $c$  = 10 nM); given are mean values ± SD ( $pK_i$ ) and mean values ( $K_i$ ) from two (9, 14), three (8, 10, 11, 16, 17, 48, 49, 51, 52) or four (15, 50, 53) independent experiments, each performed in triplicate. <sup>c</sup>The initial concentration of the peptide in human plasma/PBS (1:2 v/v) was 100 μM. Data represent means ± SD from two or three independent experiments (SD not given when no decomposition was observed). <sup>d</sup>Schindler et al. [3]

**Table S4.** *Ex vivo* biodistribution data and tumor-to-muscle ratios of [<sup>68</sup>Ga]21, [<sup>68</sup>Ga]33 and [<sup>68</sup>Ga]37.<sup>a</sup>

| tissue | uptake (%ID/g) 45 min p.i. |                       |                       |
|--------|----------------------------|-----------------------|-----------------------|
|        | [ <sup>68</sup> Ga]21      | [ <sup>68</sup> Ga]33 | [ <sup>68</sup> Ga]37 |
| kidney | 6.0 ± 1.9                  | 10 ± 0.96             | 7.6 ± 0.39            |

|                     |                  |                 |                 |
|---------------------|------------------|-----------------|-----------------|
| liver               | $0.59 \pm 0.17$  | $16 \pm 2.2$    | $4.1 \pm 0.79$  |
| gall bladder (bile) | $0.55 \pm 0.29$  | $2.0 \pm 0.14$  | $1.9 \pm 0.34$  |
| muscle              | $0.21 \pm 0.062$ | $0.41 \pm 0.17$ | $0.50 \pm 0.18$ |
| blood               | $0.63 \pm 0.20$  | $1.3 \pm 0.29$  | n.d.            |
| tumor               | $1.9 \pm 0.70$   | $1.5 \pm 0.22$  | $1.6 \pm 0.19$  |
| tumor-to-muscle     | $9.5 \pm 3.7$    | $4.1 \pm 1.7$   | $3.4 \pm 0.71$  |

<sup>a</sup>Given are mean values  $\pm$  SD (n = 3 ([<sup>68</sup>Ga]**33**, [<sup>68</sup>Ga]**37**) or n = 4 ([<sup>68</sup>Ga]**21**)). Organ uptake values were obtained at 45 min p.i. from HT-29 tumor bearing mice.

## 2. Synthesis protocols and analytical data of compounds **8**, **9**, **11**, **12**, **14-23**, **25**, **26**, **28**, **29** and **31-57**.

**General procedure for manual solid-phase peptide synthesis (SPPS).** The synthesis was performed according to a reported procedure [1] with minor modifications. The resin was allowed to swell in the solvent for 45 min before the beginning of the synthesis. For coupling conditions see Table S1.

**General procedure for the conjugation of the DOTA chelator to peptides.** The reaction was performed in a 2-mL reaction vessel with screw cap, equipped with a magnetic micro stirrer. DIPEA (27 equiv. (**14-17**), 15 equiv. (**34, 35**), 13 equiv. (**18, 32**) or 12 equiv. (**54, 55**)) was added to a solution of the peptide (2.2 equiv. (**14-17**), 1.25 equiv. (**34, 35**), 1.1 equiv. (**18, 32**) or 1 equiv. (**54, 55**)) in DMF/NMP (75:25 v/v) or DMF/NMP (80:20 v/v) (26-230  $\mu$ L), followed by the addition of DOTA tris(*tert*-butyl) succinimidyl ester (**13**, 1 equiv.) dissolved in anhydrous DMF or DMF/NMP (80:20 v/v) (6-30  $\mu$ L). After stirring at rt for 30 min, 10% aq TFA (corresponding to 18 equiv. TFA (**14-17**), 10 equiv. TFA (**34, 35**), 9 equiv. TFA (**18, 35**) or 8 equiv. TFA (**54, 55**)) was added. The protected intermediate was isolated by preparative HPLC. After lyophilization of the eluate, TFA/H<sub>2</sub>O (80:20 v/v) (0.5-3 mL) was added, and the mixture was stirred at 50 °C overnight. The crude product was taken up in H<sub>2</sub>O (25-100 mL), and the solution was subjected to lyophilization. The DOTA-conjugated peptide was purified by preparative HPLC.

**General procedure for the incorporation of Ga<sup>3+</sup> into DOTA-conjugated peptides.** The incorporation reaction was performed in a 2-mL reaction vessel with screw cap. A solution of the peptide (4 mM) in HEPES buffer (0.2 M, pH 4.2) was heated to 60 °C for 5 min, followed by the addition of a solution of Ga(NO<sub>3</sub>)<sub>3</sub> × H<sub>2</sub>O (3 equiv., 0.4 M) in aqueous HCl (10 mM). The mixture was shaken at 100 °C for 10 min (**19-23**) or 30 min (**33, 36, 37, 56, 57**) using a Thermocell mixing block from Bioer (Hangzhou, China), and the product was purified by preparative HPLC.

***N*<sup>α</sup>-(*N*<sup>α</sup>-Methylarginyl)-*N*<sup>ω</sup>-[(4-aminobutyl)aminocarbonyl]Arg-Pro-Tyr-*α*-*tert*-butyl-Gly-Leu tetrakis(hydrotrifluoroacetate) (**8**).**

Peptide **8** was synthesized according to the general procedure for SPPS using a H-Leu-2-CITrt resin (loading 0.79 mmol/g) (109 mg, 0.086 mmol). Purification by preparative RP-HPLC (column: Kinetex-XB C18, gradient: 0-35 min: A1/B1 92:8-57:43, *t<sub>R</sub>* = 18 min) afforded **8** as white fluffy solid (68.7 mg, 57%). <sup>1</sup>H-NMR (600 MHz, DMSO-*d*<sub>6</sub>):  $\delta$  0.80-0.95 (m, 15H), 1.39-1.63 (m, 12H), 1.63-1.90 (m, 6H), 1.92-2.06 (m, 1H), 2.46-2.48 (m, 3H), 2.64-2.72 (m, 1H), 2.76-2.81 (m, 2H), 2.85-2.92 (m, 1H), 3.05-3.12 (m, 4H), 3.22-3.27 (m, 2H), 3.55-3.59 (m, 2H), 3.75-3.80 (m, 1H), 4.17-4.24 (m, 1H), 4.27-4.31 (m, 1H), 4.31-4.39 (m, 1H), 4.44-4.59 (m, 2H), 6.55-6.64 (m, 2H), 6.64-7.15 (br s, 2H, interfering with the next listed signal), 6.97-7.01 (m, 2H), 7.15-7.53 (br s, 2H), 7.53-7.66 (m, 2H), 7.66-7.90 (m, 4H), 7.97 (d, 1H, *J* 7.4 Hz), 8.17-8.27 (m, 1H), 8.31-8.67 (m, 2H), 8.68-9.12 (m, 4H), 9.12-9.25 (m, 1H), 10.27-10.56 (m, 1H), 12.49 (br s, 1H). HRMS: *m/z* [*M*+2H]<sup>2+</sup> calcd. for [C<sub>44</sub>H<sub>78</sub>N<sub>14</sub>O<sub>9</sub>]<sup>2+</sup> 473.3033, found 473.3039. RP-HPLC (220 nm): > 99% (*t<sub>R</sub>* = 5.8 min, *k* = 6.6). C<sub>44</sub>H<sub>76</sub>N<sub>14</sub>O<sub>9</sub> • C<sub>8</sub>H<sub>4</sub>F<sub>12</sub>O<sub>8</sub> (945.18 + 456.09).



***N<sup>α</sup>-(N<sup>α</sup>-Methylarginyl)-N<sup>ω</sup>-[(4-aminobutyl)aminocarbonyl]Arg-Pro-Tyr-Ile-Leu tetrakis(hydrotrifluoroacetate) (9).***

Peptide **9** was synthesized according to the general procedure for SPPS using a H-Leu-2-ClTrt resin (loading 0.79 mmol/g) (120 mg, 0.095 mmol). Purification by preparative RP-HPLC (column: Kinetex-XB C18, gradient: 0-35 min: A1/B1 92:8-57:43,  $t_R$  = 18 min) afforded **9** as white fluffy solid (58.8 mg, 44%). <sup>1</sup>H-NMR (600 MHz, DMSO-*d*<sub>6</sub>): δ 0.76-0.87 (m, 9H), 0.87-0.92 (m, 3H), 0.99-1.10 (m, 1H), 1.40-1.64 (m, 13H), 1.64-1.89 (m, 7H), 1.94-2.05 (m, 1H), 2.45-2.48 (m, 3H), 2.64-2.72 (m, 1H), 2.76-2.82 (m, 2H), 2.83-2.89 (m, 1H), 3.07-3.13 (m, 4H), 3.22-3.28 (m, 2H), 3.58-3.62 (m, 2H), 3.76-3.80 (m, 1H), 4.17-4.26 (m, 2H), 4.28-4.39 (m, 1H), 4.39-4.50 (m, 1H), 4.50-4.61 (m, 1H), 6.53-6.65 (m, 2H), 6.65-7.13 (br s, 2H, interfering with the next listed signal), 6.98-7.00 (m, 2H), 7.13-7.48 (br s, 2H), 7.48-7.61 (m, 1H), 7.61-7.82 (m, 5H), 7.82-8.00 (m, 1H), 8.19 (d, 1H, *J* 7.7 Hz), 8.26-8.70 (m, 2H), 8.70-9.10 (m, 4H), 9.10-9.25 (m, 1H), 10.42 (s, 1H), 12.50 (br s, 1H). HRMS: *m/z* [*M*+2H]<sup>2+</sup> calcd. for [C<sub>44</sub>H<sub>78</sub>N<sub>14</sub>O<sub>9</sub>]<sup>2+</sup> 473.3033, found 473.3047. RP-HPLC (220 nm): > 99% ( $t_R$  = 6.0 min, *k* = 6.9). C<sub>44</sub>H<sub>76</sub>N<sub>14</sub>O<sub>9</sub> • C<sub>8</sub>H<sub>4</sub>F<sub>12</sub>O<sub>8</sub> (945.18 + 456.09).

***N<sup>α</sup>-Arginyl-N<sup>α</sup>-methyl-N<sup>ω</sup>-[(4-aminobutyl)aminocarbonyl]Arg-Pro-Tyr- $\alpha$ -tert-butyl-Gly-Leu tetrakis(hydrotrifluoroacetate) (11).***

Peptide **11** was synthesized according to the general procedure for SPPS using a H-Leu-2-ClTrt resin (loading 0.79 mmol/g) (60 mg, 0.047 mmol), with the following modification: Fmoc amino acids (Fmoc-Arg(Pbf)-OH, Fmoc-Pro-OH, Fmoc-Ile-OH, Fmoc-Tyr(*t*Bu)-OH (used in 5-fold excess) and **6** (used in 3-fold excess)) were preactivated with Oxyma/DIC (5/5 equiv. and 3/3 equiv., respectively) instead of HBTU/HOBt. After coupling of arginine building block **6** and Fmoc-deprotection, the resin was washed with CH<sub>2</sub>Cl<sub>2</sub> (5 ×), a solution of 2-nitrobenzenesulfonylchloride (31.5 mg, 0.142 mmol) and collidine (31.4 μL, 0.237 mmol) in CH<sub>2</sub>Cl<sub>2</sub> (1.25 mL) was added and the mixture was shaken at rt for 2 h. The resin was washed with DMF (5 ×), and a solution of MTBD (27.2 μL, 0.190 mmol) and methyl-4-nitrobenzenesulfonate (51.5 mg, 0.237 mmol) in DMF (1.5 mL) was added. After shaking at rt for 30 min, the resin was washed with DMF (3 ×) followed by the addition of a solution of DBU (35.4 μL, 0.237 mmol) and 2-mercaptoethanol (33.1 μL, 0.474 mmol) in DMF (1.25 mL) and shaking at rt for 30 min. The resin was washed with DMF (5 ×) followed by coupling of Fmoc-Arg(Pbf)-OH as described above. Fmoc-deprotection and cleavage from the resin was performed as described in the general procedure for SPPS. Purification by preparative RP-HPLC (column: Gemini NX-C18, gradient: 0-35 min: A1/B1 92:8-57:43,  $t_R$  = 16 min) afforded **11** as white fluffy solid (39.0 mg, 59%). <sup>1</sup>H-NMR (600 MHz, DMSO-*d*<sub>6</sub>): δ 0.79-0.95 (m, 15H), 1.42-1.80 (m, 18H), 1.92-2.03 (m, 1H), 2.66-2.72 (m, 1H), 2.76-2.81 (m, 2H), 2.84-2.95 (m, 4H), 3.06-3.14 (m, 4H), 3.22-3.28 (m, 3H), 3.50-3.51 (m, 1H), 4.17-4.23 (m, 1H), 4.25-4.32 (m, 2H), 4.32-4.40 (m, 1H), 4.41-4.47 (m, 1H), 5.12-5.18 (m, 1H), 6.59-6.64 (m, 2H), 6.64-7.19 (br s, 2H, interfering with the next listed signal), 6.98-7.01 (m, 2H), 7.19-7.52 (br s, 2H), 7.52-7.64

(m, 2H), 7.64-7.82 (m, 4H), 7.99 (d, 1H,  $J$  7.9 Hz), 8.05-8.30 (m, 4H), 8.35-8.61 (m, 2H), 8.88-9.10 (m, 1H), 9.10-9.25 (m, 1H), 10.21-10.55 (m, 1H), 12.47 (br s, 1H). HRMS:  $m/z$   $[M+3H]^{3+}$  calcd. for  $[C_{44}H_{79}N_{14}O_9]^{3+}$  315.8713, found 315.8722. RP-HPLC (220 nm): 99% ( $t_R$  = 5.7 min,  $k$  = 6.5).  $C_{44}H_{76}N_{14}O_9 \cdot C_8H_4F_{12}O_8$  (945.18 + 456.09).

***N*<sup>α</sup>-Methyl-*N*<sup>ω</sup>-[(8-amino-3,6-dioxaoctyl)aminocarbonyl]Arg-Arg-Pro-Tyr-*α*-*tert*-butyl-Gly-Leu tetrakis(hydrotrifluoroacetate) (12).**

Peptide **12** was synthesized according to the general procedure for SPPS using a H-Leu-2-ClTrt resin (loading 0.79 mmol/g) (100 mg, 0.079 mmol), with the following modification: after coupling of arginine building block **7** and Fmoc-deprotection, the resin was washed with  $CH_2Cl_2$  (5 ×), a solution of 2-nitrobenzenesulfonylchloride (52.5 mg, 0.237 mmol) and collidine (52.4 μL, 0.395 mmol) in  $CH_2Cl_2$  (1.5 mL) was added and the mixture was shaken at rt for 2 h. The resin was washed with DMF (5 ×), and a solution of MTBD (45.4 μL, 0.316 mmol) and methyl-4-nitrobenzenesulfonate (85.8 mg, 0.395 mmol) in DMF (1.8 mL) was added. After shaking at rt for 30 min, the resin was washed with DMF (3 ×) followed by the addition of a solution of DBU (59.0 μL, 0.395 mmol) and 2-mercaptoethanol (55.1 μL, 0.790 mmol) in DMF (1.5 mL) and shaking at rt for 30 min. The resin was washed with DMF (5 ×) followed by cleavage from the resin as described in the general procedure for SPPS. Purification by preparative RP-HPLC (column: Gemini-NX C18, gradient: 0-30 min: A1/B1 92:8-60:40,  $t_R$  = 13 min) afforded **12** as white fluffy solid (63.1 mg, 55%). <sup>1</sup>H-NMR (600 MHz, DMSO-*d*<sub>6</sub>): δ 0.79-0.95 (m, 15H), 1.43-1.88 (m, 14H), 1.94-2.04 (m, 1H), 2.44-2.48 (m, 3H), 2.64-2.71 (m, 1H), 2.85-2.93 (m, 1H), 2.93-3.02 (m, 2H), 3.05-3.15 (m, 2H), 3.24-3.28 (m, 4H), 3.45-3.48 (m, 2H), 3.50-3.64 (m, 8H), 3.72-3.88 (m, 1H), 4.17-4.26 (m, 1H), 4.26-4.31 (m, 1H), 4.31-4.39 (m, 1H), 4.42-4.61 (m, 2H), 6.55-6.62 (m, 2H), 6.62-7.12 (br s, 2H, interfering with the next listed signal), 6.97-7.01 (m, 2H), 7.12-7.44 (br s, 2H), 7.44-7.56 (m, 1H), 7.56-7.67 (m, 2H), 7.67-7.92 (m, 3H), 7.97 (d, 1H,  $J$  7.7 Hz), 8.22 (d, 1H,  $J$  7.5 Hz), 8.27-8.66 (m, 2H), 8.66-9.32 (m, 5H), 10.20-10.54 (m, 1H), 12.48 (br s, 1H). HRMS:  $m/z$   $[M+3H]^{3+}$  calcd. for  $[C_{46}H_{83}N_{14}O_{11}]^{3+}$  335.8783, found 335.8791. RP-HPLC (220 nm): 89% ( $t_R$  = 6.2 min,  $k$  = 7.2).  $C_{46}H_{80}N_{14}O_{11} \cdot C_8H_4F_{12}O_8$  (1005.23 + 456.09).

***N*<sup>α</sup>-(*N*<sup>α</sup>-Methylarginyl)-*N*<sup>ω</sup>-{[4-(*N*-{2-[4,7,10-tris(carboxymethyl)-1,4,7,10-tetraazacyclododecan-1-yl]acetyl})aminobutyl]aminocarbonyl}Arg-Pro-Tyr-*α*-*tert*-butyl-Gly-Leu tetrakis(hydrotrifluoroacetate) (14).**

Compound **14** was prepared from **8** (34.2 mg, 24.4 μmol) and **13** (9.0 mg, 11.0 μmol) according to the general procedure for DOTA-conjugation. Isolation of the protected intermediate: column: Kinetex-XB C18, gradient: 0-18 min: A1/B1 92:8-75:25, 18-40 min: 75:25-38:62,  $t_R$  = 28 min. Purification of the product by preparative RP-HPLC (column: Kinetex-XB C18, gradient: 0-35 min: A1/B1 92:8-57:43,  $t_R$  = 18 min) afforded **14** as

white fluffy solid (14.1 mg, 72%). <sup>1</sup>H-NMR (600 MHz, DMSO-*d*<sub>6</sub>): δ 0.81-0.85 (m, 3H), 0.87-0.95 (m, 12H), 1.40-1.64 (m, 12H), 1.64-1.89 (m, 6H), 1.95-2.06 (m, 1H), 2.46-2.48 (m, 3H), 2.65-2.71 (m, 1H), 2.85-2.90 (m, 1H), 3.00-3.27 (m, 25H), 3.53-3.84 (m, 10H), 4.18-4.24 (m, 1H), 4.27-4.31 (m, 1H), 4.31-4.39 (m, 1H), 4.45-4.61 (m, 2H), 6.56-6.64 (m, 2H), 6.64-7.09 (br s, 2H, interfering with the next listed signal), 6.97-7.00 (m, 2H), 7.09-7.56 (br s, 3H), 7.60-7.83 (m, 2H), 7.92-8.00 (m, 1H), 8.03-8.63 (m, 4H), 8.68-9.11 (m, 3H), 9.11-9.51 (m, 2H), 11.83-12.94 (m, 2H). 4 exchangeable protons (NH, OH) of the presumably 4-fold protonated molecule could not be identified. HRMS: *m/z* [*M*+2H]<sup>2+</sup> calcd. for [C<sub>60</sub>H<sub>104</sub>N<sub>18</sub>O<sub>16</sub>]<sup>2+</sup> 666.3933, found 666.3943. RP-HPLC (220 nm): > 99% (*t<sub>R</sub>* = 6.1 min, *k* = 7.0). C<sub>60</sub>H<sub>102</sub>N<sub>18</sub>O<sub>16</sub> · C<sub>8</sub>H<sub>4</sub>F<sub>12</sub>O<sub>8</sub> (1331.59 + 456.09).

***N*<sup>α</sup>-(*N*<sup>α</sup>-Methylarginyl)-*N*<sup>ω</sup>-{[4-(*N*-{2-[4,7,10-tris(carboxymethyl)-1,4,7,10-tetraazacyclododecan-1-yl]acetyl})aminobutyl]aminocarbonyl}Arg-Pro-Tyr-Ile-Leu tetrakis(hydrotrifluoroacetate) (15).**

Compound **15** was prepared from **9** (32.8 mg, 23.4 μmol) and **13** (8.6 mg, 10.5 μmol) according to the general procedure for DOTA-conjugation. Isolation of the protected intermediate: column: Kinetex-XB C18, gradient: 0-18 min: A1/B1 92:8-75:25, 18-40 min: 75:25-38:62, *t<sub>R</sub>* = 28 min. Purification of the product by preparative RP-HPLC (column: Kinetex-XB C18, gradient: 0-35 min: A1/B1 92:8-57:43, *t<sub>R</sub>* = 18 min) afforded **15** as white fluffy solid (11.7 mg, 62%). <sup>1</sup>H-NMR (600 MHz, DMSO-*d*<sub>6</sub>): δ 0.76-0.87 (m, 9H), 0.87-0.93 (m, 3H), 0.98-1.10 (m, 1H), 1.36-1.65 (m, 13H), 1.65-1.90 (m, 7H), 1.93-2.07 (m, 1H), 2.46-2.48 (m, 3H), 2.64-2.72 (m, 1H), 2.84-2.89 (m, 1H), 2.95-3.28 (m, 25H), 3.53-3.86 (m, 10H), 4.17-4.25 (m, 2H), 4.28-4.37 (m, 1H), 4.39-4.50 (m, 1H), 4.50-4.62 (m, 1H), 6.55-6.69 (m, 2H), 6.69-7.13 (br s, 2H, interfering with the next listed signal), 6.97-7.00 (m, 2H), 7.13-7.67 (br s, 3H), 7.67-8.06 (m, 3H), 8.06-8.49 (m, 3H), 8.49-9.63 (m, 6H), 11.80-12.93 (m, 2H). 4 exchangeable protons (NH, OH) of the presumably 4-fold protonated molecule could not be identified. HRMS: *m/z* [*M*+2H]<sup>2+</sup> calcd. for [C<sub>60</sub>H<sub>104</sub>N<sub>18</sub>O<sub>16</sub>]<sup>2+</sup> 666.3933, found 666.3946. RP-HPLC (220 nm): > 99% (*t<sub>R</sub>* = 6.3 min, *k* = 7.3). C<sub>60</sub>H<sub>102</sub>N<sub>18</sub>O<sub>16</sub> · C<sub>8</sub>H<sub>4</sub>F<sub>12</sub>O<sub>8</sub> (1331.59 + 456.09).

***N*<sup>α</sup>-Methyl-*N*<sup>ω</sup>-{[4-(*N*-{2-[4,7,10-tris(carboxymethyl)-1,4,7,10-tetraazacyclododecan-1-yl]acetyl})aminobutyl]aminocarbonyl}Arg-Arg-Pro-Tyr-*α*-*tert*-butyl-Gly-Leu tetrakis(hydrotrifluoroacetate) (16).**

Compound **16** was prepared from **10** (34.2 mg, 24.4 μmol) and **13** (9.0 mg, 11.0 μmol) according to the general procedure for DOTA-conjugation. Isolation of the protected intermediate: column: Kinetex-XB C18, gradient: 0-18 min: A1/B1 92:8-75:25, 18-40 min: 75:25-38:62, *t<sub>R</sub>* = 28 min. Purification of the product by preparative RP-HPLC (column: Kinetex-XB C18, gradient: 0-35 min: A1/B1 92:8-57:43, *t<sub>R</sub>* = 19 min) afforded **16** as white fluffy solid (14.7 mg, 75%). <sup>1</sup>H-NMR (600 MHz, DMSO-*d*<sub>6</sub>): δ 0.81-0.94 (m, 15H), 1.40-1.87 (m, 18H), 1.96-2.04 (m, 1H), 2.46-2.49 (m, 3H), 2.65-2.71 (m, 1H), 2.86-2.92 (m, 1H), 3.04-3.33 (m, 24H), 3.56-3.62 (m, 5H), 3.81-3.91 (m, 6H), 4.19-4.23 (m, 1H), 4.26-4.29 (m, 1H), 4.33-4.39 (m, 1H), 4.43-4.50 (m, 1H),

4.52-4.59 (m, 1H), 6.59-6.63 (m, 2H), 6.63-7.10 (br s, 2H, interfering with the next listed signal), 6.97-7.00 (m, 2H), 7.10-7.54 (br s, 3H), 7.54-7.72 (m, 2H), 7.97 (d, 1H,  $J$  7.7 Hz), 8.07-8.74 (m, 4H), 8.74-9.38 (m, 5H), 11.21-13.33 (m, 2H). 4 exchangeable protons (NH, OH) of the presumably 4-fold protonated molecule could not be identified. HRMS:  $m/z$   $[M+3H]^{3+}$  calcd. for  $[C_{60}H_{105}N_{18}O_{16}]^{3+}$  444.5980, found 444.5989. RP-HPLC (220 nm): 99% ( $t_R$  = 6.0 min,  $k$  = 6.9).  $C_{60}H_{102}N_{18}O_{16} \cdot C_8H_4F_{12}O_8$  (1331.59 + 456.09).

***N<sup>α</sup>*-Arginyl-*N<sup>α</sup>*-methyl-*N<sup>ω</sup>*-{[4-(*N*-{2-[4,7,10-tris(carboxymethyl)-1,4,7,10-tetraazacyclododecan-1-yl]acetyl})aminobutyl]aminocarbonyl}Arg-Pro-Tyr-*α*-*tert*-butyl-Gly-Leu tetrakis(hydrotrifluoroacetate) (17).**

Compound **17** was prepared from **11** (18.7 mg, 13.3  $\mu$ mol) and **13** (4.9 mg, 6.0  $\mu$ mol) according to the general procedure for DOTA-conjugation. Isolation of the protected intermediate: column: Kinetex-XB C18, gradient: 0-18 min: A1/B1 92:8-75:25, 18-40 min: 75:25-38:62,  $t_R$  = 28 min). Purification of the product by preparative RP-HPLC (column: Kinetex-XB C18, gradient: 0-35 min: A1/B1 92:8-57:43,  $t_R$  = 19 min) afforded **17** as white fluffy solid (3.0 mg, 28%).  $^1H$ -NMR (600 MHz, DMSO- $d_6$ ):  $\delta$  0.81-0.85 (m, 3H), 0.86-0.94 (m, 12H), 1.40-1.79 (m, 18H), 1.92-2.02 (m, 1H), 2.66-2.72 (m, 1H), 2.82-2.95 (m, 5H), 3.02-3.29 (m, 25H), 3.47-3.84 (m, 8H), 4.17-4.25 (m, 1H), 4.25-4.32 (m, 2H), 4.32-4.40 (m, 1H), 4.43-4.49 (m, 1H), 5.12-5.19 (m, 1H), 6.58-6.63 (m, 2H), 6.63-7.17 (br s, 2H, interfering with the next listed signal), 6.98-7.02 (m, 2H), 7.17-7.53 (br s, 2H), 7.53-7.59 (m, 1H), 7.64-7.79 (m, 1H), 7.79-8.53 (m, 7H), 9.02-9.50 (m, 2H), 12.37 (br s, 1H). 7 exchangeable protons (NH, OH) of the presumably 4-fold protonated molecule could not be identified. HRMS:  $m/z$   $[M+3H]^{3+}$  calcd. for  $[C_{60}H_{105}N_{18}O_{16}]^{3+}$  444.5980, found 444.5994. RP-HPLC (220 nm): > 99% ( $t_R$  = 6.2 min,  $k$  = 7.2).  $C_{60}H_{102}N_{18}O_{16} \cdot C_8H_4F_{12}O_8$  (1331.59 + 456.09).

***N<sup>α</sup>*-Methyl-*N<sup>ω</sup>*-{[8-(*N*-{2-[4,7,10-tris(carboxymethyl)-1,4,7,10-tetraazacyclododecan-1-yl]acetyl})amino-3,6-dioxaoctyl]aminocarbonyl}Arg-Arg-Pro-Tyr-*α*-*tert*-butyl-Gly-Leu tetrakis(hydrotrifluoroacetate) (18).**

Compound **18** was prepared from **12** (9.3 mg, 6.36  $\mu$ mol) and **13** (4.67 mg, 5.73  $\mu$ mol) according to the general procedure for DOTA-conjugation. Isolation of the protected intermediate: column: Gemini-NX C18, gradient: 0-6 min: A1/B1 85:15-79:21, 6-28 min: 79:21-40:60,  $t_R$  = 18 min. Purification of the product by preparative RP-HPLC (column: Gemini-NX C18, gradient: 0-35 min: A1/B1 97:3-60:40,  $t_R$  = 22 min) afforded **18** as white fluffy solid (9.8 mg, 93%).  $^1H$ -NMR (600 MHz, DMSO- $d_6$ ):  $\delta$  0.78-1.02 (m, 15H), 1.47-1.87 (m, 14H), 1.97-2.03 (m, 1H), 2.47-2.48 (m, 3H), 2.66-2.70 (m, 1H), 2.87-2.90 (m, 1H), 3.09-3.29 (m, 24H), 3.51-3.59 (m, 10H), 3.60-3.80 (m, 9H), 4.19-4.24 (m, 1H), 4.26-4.31 (m, 1H), 4.32-4.39 (m, 1H), 4.42-4.50 (m, 1H), 4.50-4.59 (m, 1H), 6.58-6.62 (m, 2H), 6.62-7.09 (br s, 2H, interfering with the next listed signal), 6.97-7.00 (m, 2H), 7.09-7.46 (br s, 2H), 7.46-7.65 (m, 3H), 7.98 (d, 1H,  $J$  8.0 Hz), 8.10-8.76 (m, 4H), 8.76-9.30 (m,

4H), 11.78-12.80 (m, 1H). 6 exchangeable protons (NH, OH) of the presumably 4-fold protonated molecule could not be identified. HRMS:  $m/z$   $[M+2H]^{2+}$  calcd. for  $[C_{62}H_{108}N_{18}O_{18}]^{2+}$  696.4039, found 696.4048. RP-HPLC (220 nm): 99% ( $t_R$  = 6.6 min,  $k$  = 7.7).  $C_{62}H_{106}N_{18}O_{18} \cdot C_8H_4F_{12}O_8$  (1391.64 + 456.09).

***N<sup>α</sup>-(N<sup>α</sup>-Methylarginyl)-N<sup>ω</sup>-{[4-(N-{2-[gallium(III)-4,7,10-tris(carboxymethyl)-1,4,7,10-tetraazacyclododecan-1-yl]acetyl})aminobutyl]aminocarbonyl}Arg-Pro-Tyr-*α*-tert-butyl-Gly-Leu tris(hydrotrifluoroacetate) (19).***

Compound **19** was prepared from **14** (4.8 mg, 2.7  $\mu$ mol) according to the general procedure for the insertion of Ga<sup>3+</sup>. Purification by preparative RP-HPLC (column: Kinetex-XB C18, gradient: 0-35 min: A2/B1 92:8-57:43,  $t_R$  = 17 min) yielded **19** as white fluffy solid (4.5 mg, 95%). <sup>1</sup>H-NMR (600 MHz, DMSO-*d*<sub>6</sub>):  $\delta$  0.80-0.94 (m, 15H), 1.36-1.89 (m, 18H), 1.96-2.05 (m, 1H), 2.47-2.48 (m, 3H), 2.64-2.71 (m, 1H), 2.85-2.92 (m, 1H), 3.08-3.12 (m, 4H), 3.25-3.30 (m, 9H), 3.48-3.50 (m, 6H), 3.57-3.81 (m, 16H), 4.18-4.24 (m, 1H), 4.25-4.31 (m, 1H), 4.32-4.38 (m, 1H), 4.44-4.51 (m, 1H), 4.53-4.60 (m, 1H), 6.59-6.62 (m, 2H), 6.62-7.15 (br s, 2H, interfering with the next listed signal), 6.98-7.01 (m, 2H), 7.15-7.47 (br s, 2H), 7.47-7.56 (m, 1H), 7.56-7.70 (m, 2H), 7.90-8.05 (m, 1H), 8.15-8.27 (m, 1H), 8.28-8.65 (m, 3H), 8.85-9.02 (m, 3H), 9.14-9.21 (m, 1H), 10.03-10.30 (m, 1H), 12.25-12.80 (m, 1H), 13.03-13.57 (m, 1H). HRMS:  $m/z$   $[M+2H]^{2+}$  calcd. for  $[C_{60}H_{101}GaN_{18}O_{16}]^{2+}$  699.3444, found 699.3455. RP-HPLC (220 nm): > 99% ( $t_R$  = 10.0 min,  $k$  = 12.2).  $C_{60}H_{99}GaN_{18}O_{16} \cdot C_6H_3F_9O_6$  (1398.29 + 342.07).

***N<sup>α</sup>-(N<sup>α</sup>-Methylarginyl)-N<sup>ω</sup>-{[4-(N-{2-[gallium(III)-4,7,10-tris(carboxymethyl)-1,4,7,10-tetraazacyclododecan-1-yl]acetyl})aminobutyl]aminocarbonyl}Arg-Pro-Tyr-Ile-Leu tris(hydrotrifluoroacetate) (20).***

Compound **20** was prepared from **15** (4.9 mg, 2.8  $\mu$ mol) according to the general procedure for the insertion of Ga<sup>3+</sup>. Purification by preparative RP-HPLC (column: Kinetex-XB C18, gradient: 0-35 min: A2/B1 92:8-57:43,  $t_R$  = 17 min) yielded **20** as white fluffy solid (4.9 mg, > 99%). <sup>1</sup>H-NMR (600 MHz, DMSO-*d*<sub>6</sub>):  $\delta$  0.77-0.93 (m, 12H), 0.99-1.09 (m, 1H), 1.37-1.87 (m, 20H), 1.92-2.06 (m, 1H), 2.46-2.48 (m, 3H), 2.64-2.71 (m, 1H), 2.82-2.89 (m, 1H), 3.03-3.22 (m, 10H), 3.26-3.30 (m, 8H), 3.60-3.82 (m, 17H), 4.17-4.26 (m, 2H), 4.32-4.37 (m, 1H), 4.40-4.48 (m, 1H), 4.52-4.60 (m, 1H), 6.56-6.63 (m, 2H), 6.63-7.13 (br s, 2H, interfering with the next listed signal), 6.97-7.01 (m, 2H), 7.13-7.47 (br s, 2H), 7.47-7.56 (m, 1H), 7.62-7.70 (m, 1H), 7.70-7.81 (m, 1H), 7.83-7.94 (m, 1H), 8.20 (d, 1H,  $J$  7.6 Hz), 8.25-8.64 (m, 3H), 8.86-9.20 (m, 4H), 9.99-10.35 (m, 1H), 12.51 (br s, 1H), 13.29 (br s, 1H). HRMS:  $m/z$   $[M+2H]^{2+}$  calcd. for  $[C_{60}H_{101}GaN_{18}O_{16}]^{2+}$  699.3444, found 699.3456. RP-HPLC (220 nm): > 99% ( $t_R$  = 10.7 min,  $k$  = 13.1).  $C_{60}H_{99}GaN_{18}O_{16} \cdot C_6H_3F_9O_6$  (1398.29 + 342.07).

***N*<sup>α</sup>-Methyl-*N*<sup>ω</sup>-{[4-(*N*-{2-[gallium(III)-4,7,10-tris(carboxymethyl)-1,4,7,10-tetraazacyclododecan-1-yl]acetyl})aminobutyl]aminocarbonyl}Arg-Arg-Pro-Tyr-*α*-*tert*-butyl-Gly-Leu tris(hydrotrifluoroacetate) (21).**

Compound **21** was prepared from **16** (4.8 mg, 2.7 μmol) according to the general procedure for the insertion of Ga<sup>3+</sup>. Purification by preparative RP-HPLC (column: Kinetex-XB C18, gradient: 0-35 min: A2/B1 92:8-57:43, *t*<sub>R</sub> = 17 min) yielded **21** as white fluffy solid (4.3 mg, 92%). <sup>1</sup>H-NMR (600 MHz, DMSO-*d*<sub>6</sub>): δ 0.78-0.97 (m, 15H), 1.37-1.86 (m, 18H), 1.95-2.04 (m, 1H), 2.44-2.48 (m, 3H), 2.64-2.71 (m, 1H), 2.85-2.92 (m, 1H), 3.01-3.18 (m, 9H), 3.22-3.34 (m, 13H), 3.64-3.83 (m, 13H), 4.19-4.25 (m, 1H), 4.26-4.30 (m, 1H), 4.33-4.38 (m, 1H), 4.42-4.50 (m, 1H), 4.50-4.59 (m, 1H), 6.58-6.63 (m, 2H), 6.63-7.12 (br s, 2H, interfering with the next listed signal), 6.97-7.00 (m, 2H), 7.12-7.48 (br s, 2H), 7.48-7.57 (m, 1H), 7.57-7.74 (m, 2H), 7.97 (d, 1H, *J* 7.7 Hz), 8.11-8.60 (m, 4H), 8.85-9.22 (m, 4H), 10.03-10.30 (m, 1H), 12.49 (br s, 1H), 13.30 (br s, 1H). HRMS: *m/z* [*M*+2H]<sup>2+</sup> calcd. for [C<sub>60</sub>H<sub>101</sub>GaN<sub>18</sub>O<sub>16</sub>]<sup>2+</sup> 699.3444, found 699.3448. RP-HPLC (220 nm): > 99% (*t*<sub>R</sub> = 9.5 min, *k* = 11.5). C<sub>60</sub>H<sub>99</sub>GaN<sub>18</sub>O<sub>16</sub> • C<sub>6</sub>H<sub>3</sub>F<sub>9</sub>O<sub>6</sub> (1398.29 + 342.07).

***N*<sup>α</sup>-Arginyl-*N*<sup>α</sup>-methyl-*N*<sup>ω</sup>-{[4-(*N*-{2-[gallium(III)-4,7,10-tris(carboxymethyl)-1,4,7,10-tetraazacyclododecan-1-yl]acetyl})aminobutyl]aminocarbonyl}Arg-Pro-Tyr-*α*-*tert*-butyl-Gly-Leu tris(hydrotrifluoroacetate) (22).**

Compound **22** was prepared from **17** (1.7 mg, 0.97 μmol) according to the general procedure for the insertion of Ga<sup>3+</sup>. Purification by preparative RP-HPLC (column: Kinetex-XB C18, gradient: 0-35 min: A2/B1 92:8-57:43, *t*<sub>R</sub> = 16 min) yielded **22** as white fluffy solid (1.7 mg, 99%). <sup>1</sup>H-NMR (600 MHz, DMSO-*d*<sub>6</sub>): δ 0.80-0.95 (m, 15H), 1.37-1.79 (m, 18H), 1.94-2.01 (m, 1H), 2.66-2.72 (m, 1H), 2.86-2.95 (m, 4H), 3.04-3.28 (m, 21H), 3.47-3.79 (m, 13H), 4.18-4.25 (m, 1H), 4.26-4.33 (m, 2H), 4.33-4.39 (m, 1H), 4.41-4.48 (m, 1H), 5.10-5.18 (m, 1H), 6.58-6.63 (m, 2H), 6.63-7.14 (br s, 2H, interfering with the next listed signal), 6.98-7.02 (m, 2H), 7.14-7.46 (br s, 2H), 7.46-7.60 (m, 2H), 7.60-7.76 (m, 1H), 7.97 (d, 1H, *J* 7.9 Hz), 8.04-8.61 (m, 6H), 8.78-9.04 (m, 1H), 9.17 (s, 1H), 9.85-10.07 (m, 1H), 12.15-12.86 (m, 1H), 12.91-13.48 (m, 1H). HRMS: *m/z* [*M*+2H]<sup>2+</sup> calcd. for [C<sub>60</sub>H<sub>101</sub>GaN<sub>18</sub>O<sub>16</sub>]<sup>2+</sup> 699.3444, found 699.3454. RP-HPLC (220 nm): 98% (*t*<sub>R</sub> = 9.6 min, *k* = 11.6). C<sub>60</sub>H<sub>99</sub>GaN<sub>18</sub>O<sub>16</sub> • C<sub>6</sub>H<sub>3</sub>F<sub>9</sub>O<sub>6</sub> (1398.29 + 342.07).

***N*<sup>α</sup>-Methyl-*N*<sup>ω</sup>-{[8-(*N*-{2-[gallium(III)-4,7,10-tris(carboxymethyl)-1,4,7,10-tetraazacyclododecan-1-yl]acetyl})amino-3,6-dioxaoctyl]aminocarbonyl}Arg-Arg-Pro-Tyr-*α*-*tert*-butyl-Gly-Leu tris(hydrotrifluoroacetate) (23).**

Compound **23** was prepared from **18** (3.0 mg, 1.62 μmol) according to the general procedure for the insertion of Ga<sup>3+</sup>. Purification by preparative RP-HPLC (column: Gemini-NX C18, gradient: 0-35 min: A2/B1 97:3-60:40, *t*<sub>R</sub> = 21 min) yielded **23** as white fluffy solid (2.7 mg, 92%). <sup>1</sup>H-NMR (600 MHz, DMSO-*d*<sub>6</sub>): δ 0.77-

0.97 (m, 15H), 1.42-1.90 (m, 14H), 1.94-2.04 (m, 1H), 2.45-2.49 (m, 3H), 2.64-2.73 (m, 1H), 2.85-2.92 (m, 1H), 3.07-3.31 (m, 20H), 3.40-3.83 (m, 23H), 4.16-4.25 (m, 1H), 4.25-4.31 (m, 1H), 4.33-4.40 (m, 1H), 4.42-4.59 (m, 2H), 6.56-6.63 (m, 2H), 6.63-7.12 (br s, 2H, interfering with the next listed signal), 6.97-7.00 (m, 2H), 7.12-7.49 (br s, 2H), 7.49-7.81 (m, 3H), 7.98 (d, 1H,  $J$  7.7 Hz), 8.22 (d, 1H,  $J$  7.6 Hz), 8.28-8.65 (m, 3H), 8.78-9.20 (m, 4H), 10.05-10.40 (m, 1H), 12.48 (br s, 1H), 13.28 (br s, 1H). HRMS:  $m/z$   $[M+3H]^{3+}$  calcd. for  $[C_{62}H_{106}GaN_{18}O_{18}]^{3+}$  486.5724, found 486.5733. RP-HPLC (220 nm): > 99% ( $t_R$  = 10.7 min,  $k$  = 13.1).  $C_{62}H_{103}GaN_{18}O_{18} \cdot C_6H_3F_9O_6$  (1458.34 + 342.07).

***N*<sup>α</sup>-Methyl-*N*<sup>ω</sup>-({4-N-[4-(4-fluorophenyl)phenylalanyl]aminobutyl}aminocarbonyl)Arg-Arg-Pro-Tyr-*α*-tert-butyl-Gly-Leu tetrakis(hydrotrifluoroacetate) (25).**

HBTU (4.0 mg, 10.4 μmol) and DIPEA (3.6 μL, 20.9 μmol) were added to a solution of HOBt (1.4 mg, 10.4 μmol) and **24** (5.4 mg, 14.9 μmol) in DMF/NMP (80:20 v/v) (15 μL) in a 2-mL reaction vessel. The mixture was vortexed, incubated for 5 min at rt and added to a solution of **10** (29.8 mg, 21.3 μmol) and DIPEA (14.8 μL, 85.2 μmol) in DMF/NMP (80:20 v/v) (18 μL) in a 2-mL reaction vessel with screw cap equipped with a magnetic micro stirrer. After stirring at rt for 60 min, 10% aq TFA (106.1 μL, 106 μmol) was added. The protected intermediate was isolated by preparative HPLC (column: Gemini-NX C18, gradient: 0-6 min: A1/B1 85:15-82:18, 6-15 min: 82:18-70:30, 15-25 min: 70:30-60:40, 25-30 min: 60:40-40:60,  $t_R$  = 26 min). After lyophilization of the eluate, TFA/H<sub>2</sub>O (95:5 v/v) (2 mL) was added, and the mixture was stirred at rt for 2.5 h. Additional TFA (1 mL) was added and stirring was continued for 1 h. The crude product was dissolved in H<sub>2</sub>O (40 mL) and the solution was subjected to lyophilization. Purification of the product by preparative RP-HPLC (column: Gemini-NX C18, gradient: 0-5 min: A1/B1 85:15-70:30, 5-15 min: 70:30-50:50,  $t_R$  = 9 min) afforded **25** as white fluffy solid (7.9 mg, 46%). <sup>1</sup>H-NMR (600 MHz, DMSO-*d*<sub>6</sub>): δ 0.79-0.95 (m, 15H), 1.27-1.38 (m, 4H), 1.43-1.88 (m, 14H), 1.93-2.03 (m, 1H), 2.38-2.49 (m, 3H), 2.64-2.72 (m, 1H), 2.85-2.93 (m, 1H), 2.95-3.17 (m, 8H), 3.18-3.25 (m, 2H), 3.43-3.88 (m, 3H), 3.88-3.98 (m, 1H), 4.16-4.31 (m, 2H), 4.31-4.40 (m, 1H), 4.40-4.58 (m, 2H), 6.57-6.62 (m, 2H), 6.62-7.10 (br s, 2H, interfering with the next listed signal), 6.97-7.00 (m, 2H), 7.10-7.57 (br s, 2H, interfering with the next two listed signals), 7.27-7.32 (m, 4H), 7.40-7.50 (m, 1H), 7.57-7.78 (m, 6H), 7.78-8.60 (m, 8H), 8.60-9.44 (m, 4H), 10.32 (br s, 1H), 12.49 (br s, 1H). 1 exchangeable proton (NH, OH) of the presumably 4-fold protonated molecule could not be identified. HRMS:  $m/z$   $[M+2H]^{2+}$  calcd. for  $[C_{59}H_{90}FN_{15}O_{10}]^{2+}$  593.8484, found 593.8491. RP-HPLC (220 nm): > 99% ( $t_R$  = 10.9 min,  $k$  = 13.3).  $C_{59}H_{88}FN_{15}O_{10} \cdot C_8H_4F_{12}O_8$  (1186.45 + 456.09).

***N*<sup>α</sup>-Methyl-*N*<sup>ω</sup>-({8-N-[4-(4-fluorophenyl)-phenylalanyl]amino-3,6-dioxaoctyl}aminocarbonyl)Arg-Arg-Pro-Tyr-*α*-tert-butyl-Gly-Leu tetrakis(hydrotrifluoroacetate) (26).**

Compound **26** was prepared from **12** (29.2 mg, 20.0  $\mu\text{mol}$ ) and **24** (5.0 mg, 14.0  $\mu\text{mol}$ ) according to the procedure for the synthesis of **25**. Isolation of the protected intermediate: column: Gemini-NX C18, gradient: 0-6 min: A1/B1 85:15-82:18, 6-15 min: 82:18-70:30, 15-25 min: 70:30-60:40, 25-30 min: 60:40-40:60,  $t_R$  = 26 min. Purification of the product by preparative RP-HPLC (column: Gemini-NX C18, gradient: 0-5 min: A1/B1 85:15-70:30, 5-15 min: 70:30-50:50,  $t_R$  = 10 min) afforded **26** as white fluffy solid (7.76 mg, 47%).  $^1\text{H-NMR}$  (600 MHz,  $\text{DMSO-}d_6$ ):  $\delta$  0.80-0.95 (m, 15H), 1.38-1.90 (m, 14H), 1.94-2.05 (m, 1H), 2.40-2.48 (m, 3H), 2.64-2.71 (m, 1H), 2.86-2.92 (m, 1H), 2.97-3.02 (m, 1H), 3.04-3.26 (m, 8H), 3.34-3.44 (m, 5H), 3.45-3.49 (m, 4H), 3.52-3.64 (m, 2H), 3.64-3.92 (m, 1H), 3.95-4.03 (m, 1H), 4.18-4.30 (m, 2H), 4.32-4.39 (m, 1H), 4.43-4.59 (m, 2H), 6.57-6.63 (m, 2H), 6.63-7.11 (br s, 2H, interfering with the next listed signal), 6.97-7.00 (m, 2H), 7.11-7.57 (br s, 2H, interfering with the next two listed signals), 7.27-7.33 (m, 4H), 7.39-7.49 (m, 1H), 7.57-7.72 (m, 6H), 7.97 (d, 1H,  $J$  7.7 Hz), 8.00-8.70 (m, 7H), 8.70-9.37 (m, 4H), 10.30 (br s, 1H), 12.49 (br s, 1H). 1 exchangeable proton (NH, OH) of the presumably 4-fold protonated molecule could not be identified. HRMS:  $m/z$   $[M+H]^+$  calcd. for  $[\text{C}_{61}\text{H}_{93}\text{FN}_{15}\text{O}_{12}]^+$  1246.7107, found 1246.7112. RP-HPLC (220 nm): 99% ( $t_R$  = 11.5 min,  $k$  = 14.1).  $\text{C}_{61}\text{H}_{92}\text{FN}_{15}\text{O}_{12} \cdot \text{C}_8\text{H}_4\text{F}_{12}\text{O}_8$  (1246.50 + 456.09).

***N* <sup>$\alpha$</sup> -Methyl-*N* <sup>$\omega$</sup> -{[4-N-(4-aminomethyl-3-fluorobenzoyl)aminobutyl]aminocarbonyl}Arg-Arg-Pro-Tyr- $\alpha$ -tert-butyl-Gly-Leu tetrakis(hydrotrifluoroacetate) (**28**).**

Compound **28** was prepared from **10** (16.6 mg, 11.9  $\mu\text{mol}$ ) and **27** (2.2 mg, 8.30  $\mu\text{mol}$ ) according to the procedure for the synthesis of **25** (modification: stirring of the mixture for 75 min instead of 60 min). Isolation of the protected intermediate: column: Gemini-NX C18, gradient: 0-6 min: A1/B1 85:15-82:18, 6-16 min: 82:18-70:30, 16-30 min: 70:30-60:40,  $t_R$  = 23 min. Purification of the product by preparative RP-HPLC (column: Gemini-NX C18, gradient: 0-5 min: A1/B1 85:15-80:20, 5-15 min: 80:20-60:40,  $t_R$  = 11 min) afforded **28** as white fluffy solid (2.2 mg, 24%).  $^1\text{H-NMR}$  (600 MHz,  $\text{DMSO-}d_6$ ):  $\delta$  0.77-0.97 (m, 15H), 1.39-1.90 (m, 18H), 1.94-2.05 (m, 1H), 2.45-2.49 (m, 3H), 2.64-2.71 (m, 1H), 2.84-2.94 (m, 1H), 3.05-3.17 (m, 4H), 3.23-3.28 (m, 4H), 3.50-3.64 (m, 2H), 3.73-3.88 (m, 1H), 4.08-4.17 (m, 2H), 4.17-4.24 (m, 1H), 4.26-4.31 (m, 1H), 4.32-4.40 (m, 1H), 4.41-4.60 (m, 2H), 6.57-6.62 (m, 2H), 6.62-7.09 (br s, 2H, interfering with the next listed signal), 6.97-7.00 (m, 2H), 7.09-7.44 (br s, 2H), 7.44-7.67 (m, 4H), 7.67-7.76 (m, 2H), 7.98 (d, 1H,  $J$  7.7 Hz), 8.05-8.59 (m, 6H), 8.59-8.66 (m, 1H), 8.73-9.25 (m, 4H), 9.86-10.16 (m, 1H), 12.44 (br s, 1H). 1 exchangeable proton (NH, OH) of the presumably 4-fold protonated molecule could not be identified. HRMS:  $m/z$   $[M+2H]^{2+}$  calcd. for  $[\text{C}_{52}\text{H}_{84}\text{FN}_{15}\text{O}_{10}]^{2+}$  548.8249, found 548.8262. RP-HPLC (220 nm): > 99% ( $t_R$  = 7.0 min,  $k$  = 8.2).  $\text{C}_{52}\text{H}_{82}\text{FN}_{15}\text{O}_{10} \cdot \text{C}_8\text{H}_4\text{F}_{12}\text{O}_8$  (1096.32 + 456.09).



***N*<sup>α</sup>-Methyl-*N*<sup>ω</sup>-{[8-*N*-(4-aminomethyl-3-fluorobenzoyl)amino-3,6-dioxaoctyl]aminocarbonyl}Arg-Arg-Pro-Tyr-*α*-*tert*-butyl-Gly-Leu tetrakis(hydrotrifluoroacetate) (29).**

Compound **29** was prepared from **12** (12.2 mg, 8.35 μmol) and **27** (1.6 mg, 5.84 μmol) according to the procedure for the synthesis of **25**. Isolation of the protected intermediate: column: Gemini-NX C18, gradient: 0-6 min: A1/B1 85:15-82:18, 6-15 min: 82:18-70:30, 15-25 min: 70:30-60:40, *t*<sub>R</sub> = 22 min. Purification of the product by preparative RP-HPLC (column: Gemini-NX C18, gradient: 0-5 min: A1/B1 85:15-80:20, 5-15 min: 80:20-60:40, *t*<sub>R</sub> = 11 min) afforded **29** as white fluffy solid (2.1 mg, 32%). <sup>1</sup>H-NMR (600 MHz, DMSO-*d*<sub>6</sub>): δ 0.78-0.96 (m, 15H), 1.44-1.88 (m, 14H), 1.95-2.04 (m, 1H), 2.44-2.48 (m, 3H), 2.65-2.72 (m, 1H), 2.85-2.91 (m, 1H), 3.07-3.15 (m, 2H), 3.23-3.29 (m, 4H), 3.42-3.47 (m, 4H), 3.53-3.61 (m, 8H), 3.78-3.80 (m, 1H), 4.12-4.15 (m, 2H), 4.20-4.23 (m, 1H), 4.27-4.29 (m, 1H), 4.34-4.38 (m, 1H), 4.44-4.57 (m, 2H), 6.57-6.62 (m, 2H), 6.62-7.11 (br s, 2H, interfering with the next listed signal), 6.97-7.00 (m, 2H), 7.11-7.46 (br s, 2H), 7.46-7.54 (m, 1H), 7.54-7.77 (m, 5H), 7.97 (d, 1H, *J* 7.9 Hz), 8.11-8.65 (m, 6H), 8.65-8.72 (m, 1H), 8.72-9.31 (m, 5H), 10.05-10.33 (m, 1H), 12.49 (br s, 1H). HRMS: *m/z* [*M*+2H]<sup>2+</sup> calcd. for [C<sub>54</sub>H<sub>88</sub>FN<sub>15</sub>O<sub>12</sub>]<sup>2+</sup> 578.8355, found 578.8369. RP-HPLC (220 nm): 99% (*t*<sub>R</sub> = 7.1 min, *k* = 8.3). C<sub>54</sub>H<sub>86</sub>FN<sub>15</sub>O<sub>12</sub> • C<sub>8</sub>H<sub>4</sub>F<sub>12</sub>O<sub>8</sub> (1156.37 + 456.09).

***N*<sup>α</sup>-Methyl-*N*<sup>ω</sup>-{[8-*N*-[*N*<sup>α</sup>-(6-aminohexanoyl)-4-(4-fluorophenyl)-phenylalanyl]amino-3,6-dioxaoctyl]aminocarbonyl}Arg-Arg-Pro-Tyr-*α*-*tert*-butyl-Gly-Leu tetrakis(hydrotrifluoroacetate) (31).**

The reaction was performed in a 2-mL reaction vessel with screw cap, equipped with a magnetic micro stirrer. DIPEA (2.5 μL, 14.3 μmol) and a solution of *N*-Boc-6-aminohexanoic acid succinimidyl ester (**30**) (1.06 mg, 3.22 μmol) in anhydrous DMF/NMP (75:25 v/v) (4 μL) were added to a solution of **26** (6.09 mg, 3.58 μmol) in anhydrous DMF/NMP (75:25 v/v) (41 μL). The mixture was stirred at rt for 45 min followed by the addition of 10% aq TFA (14.3 μL, 14.3 μmol). The protected intermediate was isolated by preparative HPLC (column: Gemini-NX C18, gradient: 0-5 min: A1/B1 85:15-70:30, 5-15 min: 70:30-50:50, 15-25 min: 50:50-30:70, *t*<sub>R</sub> = 14 min) and the eluate was subjected to lyophilization. TFA/H<sub>2</sub>O (95:5 v/v) (2 mL) was added, and the mixture was stirred at rt for 3 h. Additional TFA (1 mL) was added and stirring was continued for 30 min. The crude product was dissolved in H<sub>2</sub>O (40 mL) and the mixture was subjected to lyophilization. Purification of the product by preparative RP-HPLC (column: Gemini-NX C18, gradient: 0-5 min: A1/B1 85:15-70:30, 5-15 min: 70:30-50:50, *t*<sub>R</sub> = 10 min) gave **31** as white fluffy solid (3.84 mg, 66%). HRMS: *m/z* [*M*+2H]<sup>2+</sup> calcd. for [C<sub>67</sub>H<sub>105</sub>FN<sub>16</sub>O<sub>13</sub>]<sup>2+</sup> 680.4010, found 680.4019. RP-HPLC (220 nm): > 99% (*t*<sub>R</sub> = 12.2 min, *k* = 15.1). C<sub>67</sub>H<sub>103</sub>FN<sub>16</sub>O<sub>13</sub> • C<sub>8</sub>H<sub>4</sub>F<sub>12</sub>O<sub>8</sub> (1359.66 + 456.09).

***N*<sup>α</sup>-Methyl-*N*<sup>ω</sup>-({8-*N*-[*N*<sup>α</sup>-(6-*N*-{2-[4,7,10-tris(carboxymethyl)-1,4,7,10-tetraazacyclododecan-1-yl]acetyl}-amino)hexanoyl]-4-(4-fluorophenyl)-phenylalanyl]amino-3,6-dioxaoctyl}aminocarbonyl)Arg-Arg-Pro-Tyr-*α*-*tert*-butyl-Gly-Leu tetrakis(hydrotrifluoroacetate) (32).**

Compound **32** was prepared from **31** (3.84 mg, 2.11 μmol) and **13** (1.55 mg, 1.90 μmol) according to the general procedure for DOTA-conjugation (modification: stirring of the mixture for 45 min instead of 30 min). Isolation of the protected intermediate: column: Gemini-NX C18, gradient: 0-5 min: A1/B1 85:15-70:30, 5-15 min: 70:30-50:50, *t*<sub>R</sub> = 14 min. Purification of the product by preparative RP-HPLC (column: Gemini-NX C18, gradient: 0-5 min: A1/B1 85:15-70:30, 5-15 min: 70:30-50:50, *t*<sub>R</sub> = 10 min) afforded **32** as white fluffy solid (2.9 mg, 69%). <sup>1</sup>H-NMR (600 MHz, DMSO-*d*<sub>6</sub>): δ 0.80-0.94 (m, 15H), 1.07-1.18 (m, 2H), 1.28-1.43 (m, 4H), 1.45-1.89 (m, 14H), 1.95-2.10 (m, 3H), 2.44-2.47 (m, 3H), 2.64-2.71 (m, 1H), 2.72-3.26 (m, 29H), 3.40-3.73 (m, 18H), 3.76-3.83 (m, 1H), 4.17-4.25 (m, 1H), 4.25-4.30 (m, 1H), 4.32-4.39 (m, 1H), 4.42-4.60 (m, 3H), 6.58-6.62 (m, 2H), 6.62-7.12 (br s, 2H, interfering with the next listed signal), 6.97-7.00 (m, 2H), 7.12-7.45 (br s, 2H, interfering with the next listed signal), 7.25-7.32 (m, 4H), 7.45-7.52 (m, 1H), 7.52-7.56 (m, 2H), 7.56-7.72 (m, 4H), 7.81-8.30 (m, 5H), 8.30-9.44 (m, 6H), 10.22-10.69 (m, 1H), 11.12-12.83 (m, 2H). 4 exchangeable protons (NH, OH) of the presumably 4-fold protonated molecule could not be identified. HRMS: *m/z* [*M*+2H]<sup>2+</sup> calcd. for [C<sub>83</sub>H<sub>131</sub>FN<sub>20</sub>O<sub>20</sub>]<sup>2+</sup> 873.4911, found 873.4920. RP-HPLC (220 nm): 99% (*t*<sub>R</sub> = 12.5 min, *k* = 15.4). C<sub>83</sub>H<sub>129</sub>FN<sub>20</sub>O<sub>20</sub> • C<sub>8</sub>H<sub>4</sub>F<sub>12</sub>O<sub>8</sub> (1746.06 + 456.09).

***N*<sup>α</sup>-Methyl-*N*<sup>ω</sup>-({8-*N*-[*N*<sup>α</sup>-(6-*N*-{2-[gallium(III)-4,7,10-tris(carboxymethyl)-1,4,7,10-tetraazacyclododecan-1-yl]acetyl}-amino)hexanoyl]-4-(4-fluorophenyl)-phenylalanyl]amino-3,6-dioxaoctyl}aminocarbonyl)Arg-Arg-Pro-Tyr-*α*-*tert*-butyl-Gly-Leu tris(hydrotrifluoroacetate) (33).**

Compound **33** was prepared from **32** (1.81 mg, 0.82 μmol) according to the general procedure for the insertion of Ga<sup>3+</sup>. Purification by preparative RP-HPLC (column: Gemini-NX C18, gradient: 0-5 min: A1/B1 85:15-75:25, 5-10 min: 75:25-67:33, 10-20 min: 67:33-55:45, *t*<sub>R</sub> = 14 min) yielded **33** as white fluffy solid (1.76 mg, 99%). <sup>1</sup>H-NMR (600 MHz, DMSO-*d*<sub>6</sub>): δ 0.81-0.94 (m, 15H), 1.07-1.16 (m, 2H), 1.27-1.41 (m, 4H), 1.47-1.64 (m, 8H), 1.64-1.87 (m, 6H), 1.95-2.07 (m, 3H), 2.44-2.47 (m, 3H), 2.64-2.71 (m, 1H), 2.74-2.81 (m, 1H), 2.85-2.91 (m, 1H), 2.91-3.02 (m, 3H), 3.07-3.10 (m, 1H), 3.10-3.29 (m, 18H), 3.34-3.37 (m, 4H), 3.37-3.49 (m, 7H), 3.49-3.51 (m, 3H), 3.58-3.76 (m, 10H), 4.17-4.25 (m, 1H), 4.25-4.31 (m, 1H), 4.33-4.38 (m, 1H), 4.43-4.60 (m, 3H), 6.57-6.62 (m, 2H), 6.62-7.10 (br s, 2H, interfering with the next listed signal), 6.97-7.01 (m, 2H), 7.10-7.45 (br s, 2H, interfering with the next listed signal), 7.25-7.32 (m, 4H), 7.45-7.52 (m, 1H), 7.52-7.72 (m, 6H), 7.86-8.12 (m, 3H), 8.12-8.61 (m, 4H), 8.78-9.21 (m, 4H), 9.85-10.20 (m, 1H), 12.48 (br s, 1H), 13.27 (br s, 1H). HRMS: *m/z* [*M*+2H]<sup>2+</sup> calcd. for [C<sub>83</sub>H<sub>128</sub>FGaN<sub>20</sub>O<sub>20</sub>]<sup>2+</sup> 906.4421, found 906.4431. RP-HPLC (220 nm): 99% (*t*<sub>R</sub> = 12.5 min, *k* = 15.4). C<sub>83</sub>H<sub>126</sub>FGaN<sub>20</sub>O<sub>20</sub> • C<sub>6</sub>H<sub>3</sub>F<sub>9</sub>O<sub>6</sub> (1812.76 + 342.07).

***N<sup>α</sup>*-Methyl-*N<sup>ω</sup>*-{[4-N-(*N<sup>α</sup>*-{2-[4,7,10-tris(carboxymethyl)-1,4,7,10-tetraazacyclododecan-1-yl]acetyl}-4-{4-fluorophenyl}phenylalanyl)aminobutyl]aminocarbonyl}Arg-Arg-Pro-Tyr-*α*-*tert*-butyl-Gly-Leu tetrakis(hydrotrifluoroacetate) (34).**

Compound **34** was prepared from **25** (7.9 mg, 4.81  $\mu$ mol) and **13** (3.14 mg, 3.85  $\mu$ mol) according to the general procedure for DOTA-conjugation. Isolation of the protected intermediate: column: Gemini-NX C18, gradient: 0-5 min: A1/B1 85:15-70:30, 5-15 min: 70:30-50:50,  $t_R$  = 13 min. Purification of the product by preparative RP-HPLC (column: Gemini-NX C18, gradient: 0-5 min: A1/B1 85:15-70:30, 5-15 min: 70:30-50:50,  $t_R$  = 9 min) afforded **34** as white fluffy solid (6.1 mg, 78%). <sup>1</sup>H-NMR (600 MHz, DMSO-*d*<sub>6</sub>):  $\delta$  0.81-0.94 (m, 15H), 1.33-1.44 (m, 4H), 1.46-1.87 (m, 14H), 1.95-2.05 (m, 1H), 2.46-2.49 (m, 3H), 2.65-2.70 (m, 1H), 2.77-3.26 (m, 28H), 3.55-3.67 (m, 5H), 3.67-3.93 (m, 5H), 4.19-4.24 (m, 1H), 4.26-4.30 (m, 1H), 4.33-4.39 (m, 1H), 4.42-4.60 (m, 3H), 6.58-6.62 (m, 2H), 6.62-7.12 (br s, 2H, interfering with the next listed signal), 6.97-7.00 (m, 2H), 7.12-7.54 (br s, 2H, interfering with the next listed signal), 7.26-7.33 (m, 4H), 7.54-7.57 (m, 2H), 7.57-7.71 (m, 4H), 7.71-8.53 (m, 6H), 8.53-9.32 (m, 6H), 11.49 (br s, 1H), 12.47 (br s, 1H). 4 exchangeable protons (NH, OH) of the presumably 4-fold protonated molecule could not be identified. HRMS:  $m/z$  [ $M+2H$ ]<sup>2+</sup> calcd. for [C<sub>75</sub>H<sub>116</sub>FN<sub>19</sub>O<sub>17</sub>]<sup>2+</sup> 786.9385, found 786.9394. RP-HPLC (220 nm): > 99% ( $t_R$  = 11.2 min,  $k$  = 13.7). C<sub>75</sub>H<sub>114</sub>FN<sub>19</sub>O<sub>17</sub> • C<sub>8</sub>H<sub>4</sub>F<sub>12</sub>O<sub>8</sub> (1572.85 + 456.09).

***N<sup>α</sup>*-Methyl-*N<sup>ω</sup>*-{[8-N-(*N<sup>α</sup>*-{2-[4,7,10-tris(carboxymethyl)-1,4,7,10-tetraazacyclododecan-1-yl]acetyl}-4-{4-fluorophenyl}-phenylalanyl)amino-3,6-dioxaoctyl]aminocarbonyl}Arg-Arg-Pro-Tyr-*α*-*tert*-butyl-Gly-Leu tetrakis(hydrotrifluoroacetate) (35).**

Compound **35** was prepared from **26** (6.6 mg, 3.86  $\mu$ mol) and **13** (2.52 mg, 3.09  $\mu$ mol) according to the general procedure for DOTA-conjugation. Isolation of the protected intermediate: column: Gemini-NX C18, gradient: 0-5 min: A1/B1 85:15-70:30, 5-15 min: 70:30-50:50,  $t_R$  = 13 min. Purification of the product by preparative RP-HPLC (column: Gemini-NX C18, gradient: 0-5 min: A1/B1 85:15-70:30, 5-15 min: 70:30-50:50,  $t_R$  = 10 min) afforded **35** as white fluffy solid (5.2 mg, 81%). <sup>1</sup>H-NMR (600 MHz, DMSO-*d*<sub>6</sub>):  $\delta$  0.80-0.95 (m, 15H), 1.47-1.87 (m, 14H), 1.95-2.03 (m, 1H), 2.46-2.48 (m, 3H), 2.64-2.70 (m, 1H), 2.75-2.79 (m, 1H), 2.84-2.91 (m, 3H), 3.23-3.41 (m, 24H), 3.49-3.61 (m, 16H), 3.77-3.87 (m, 2H), 4.18-4.24 (m, 1H), 4.27-4.29 (m, 1H), 4.32-4.40 (m, 1H), 4.43-4.50 (m, 1H), 4.50-4.58 (m, 1H), 4.60-4.71 (m, 1H), 6.56-6.62 (m, 2H), 6.62-7.09 (br s, 2H, interfering with the next listed signal), 6.97-7.00 (m, 2H), 7.09-7.43 (br s, 2H, interfering with the next listed signal), 7.26-7.34 (m, 4H), 7.43-7.52 (m, 1H), 7.52-7.64 (m, 4H), 7.64-7.69 (m, 2H), 7.87-8.02 (m, 1H), 8.07-8.83 (m, 5H), 8.83-9.29 (m, 4H), 10.19-11.03 (m, 1H), 11.99-12.87 (m, 1H). 5 exchangeable protons (NH, OH) of the presumably 4-fold protonated molecule could not be identified. HRMS:  $m/z$  [ $M+2H$ ]<sup>2+</sup> calcd. for [C<sub>77</sub>H<sub>120</sub>FN<sub>19</sub>O<sub>19</sub>]<sup>2+</sup> 816.9490, found 816.9497. RP-HPLC (220 nm): 97% ( $t_R$  = 12.1 min,  $k$  = 14.9). C<sub>77</sub>H<sub>118</sub>FN<sub>19</sub>O<sub>19</sub> • C<sub>8</sub>H<sub>4</sub>F<sub>12</sub>O<sub>8</sub> (1632.90 + 456.09).

***N<sup>α</sup>*-Methyl-*N<sup>ω</sup>*-{[4-*N*-(*N<sup>α</sup>*-{2-[gallium(III)-4,7,10-tris(carboxymethyl)-1,4,7,10-tetraazacyclododecan-1-yl]acetyl}-4-(4-fluorophenyl)phenylalanyl)aminobutyl]aminocarbonyl}Arg-Arg-Pro-Tyr-*α*-*tert*-butyl-Gly-Leu tris(hydrotrifluoroacetate) (36).**

Compound **36** was prepared from **34** (3.49 mg, 1.72  $\mu$ mol) according to the general procedure for the insertion of Ga<sup>3+</sup>. Purification by preparative RP-HPLC (column: Gemini-NX C18, gradient: 0-5 min: A1/B1 85:15-75:25, 5-10 min: 75:25-67:33, 10-20 min: 67:33-55:45,  $t_R$  = 12 min) yielded **36** as white fluffy solid (3.26 mg, 96%). <sup>1</sup>H-NMR (600 MHz, DMSO-*d*<sub>6</sub>):  $\delta$  0.79-0.95 (m, 15H), 1.31-1.43 (m, 4H), 1.44-1.89 (m, 14H), 1.95-2.04 (m, 1H), 2.43-2.48 (m, 3H), 2.64-2.85 (m, 3H), 2.85-3.29 (m, 22H), 3.35-3.90 (m, 14H), 4.17-4.25 (m, 1H), 4.25-4.31 (m, 1H), 4.31-4.41 (m, 1H), 4.41-4.59 (m, 3H), 6.57-6.63 (m, 2H), 6.63-7.12 (br s, 2H, interfering with the next listed signal), 6.97-7.00 (m, 2H), 7.12-7.45 (br s, 2H, interfering with the next listed signal), 7.26-7.33 (m, 4H), 7.45-7.53 (m, 1H), 7.53-7.76 (m, 6H), 7.97 (d, 1H, *J* 7.8 Hz), 8.03-8.16 (m, 1H), 8.22 (d, 1H, *J* 7.3 Hz), 8.28-8.65 (m, 2H), 8.68-9.26 (m, 5H), 9.75-10.27 (m, 1H), 12.47 (br s, 1H), 13.27 (br s, 1H). HRMS:  $m/z$  [ $M+3H$ ]<sup>3+</sup> calcd. for [C<sub>75</sub>H<sub>114</sub>FGaN<sub>19</sub>O<sub>17</sub>]<sup>3+</sup> 546.9288, found 546.9299. RP-HPLC (220 nm): > 99% ( $t_R$  = 14.4 min, *k* = 17.9). C<sub>75</sub>H<sub>111</sub>FGaN<sub>19</sub>O<sub>17</sub> • C<sub>6</sub>H<sub>3</sub>F<sub>9</sub>O<sub>6</sub> (1639.55 + 342.07).

***N<sup>α</sup>*-Methyl-*N<sup>ω</sup>*-{[8-*N*-(*N<sup>α</sup>*-{2-[gallium(III)-4,7,10-tris(carboxymethyl)-1,4,7,10-tetraazacyclododecan-1-yl]acetyl}-4-{4-fluorophenyl}-phenylalanyl)amino-3,6-dioxaoctyl]aminocarbonyl}Arg-Arg-Pro-Tyr-*α*-*tert*-butyl-Gly-Leu tris(hydrotrifluoroacetate) (37).**

Compound **37** was prepared from **35** (3.33 mg, 1.59  $\mu$ mol) according to the general procedure for the insertion of Ga<sup>3+</sup>. Purification by preparative RP-HPLC (column: Gemini-NX C18, gradient: 0-5 min: A1/B1 85:15-75:25, 5-10 min: 75:25-67:33, 10-20 min: 67:33-55:45,  $t_R$  = 12 min) yielded **37** as white fluffy solid (3.09 mg, 95%). <sup>1</sup>H-NMR (600 MHz, DMSO-*d*<sub>6</sub>):  $\delta$  0.80-0.94 (m, 15H), 1.47-1.87 (m, 14H), 1.95-2.05 (m, 1H), 2.44-2.47 (m, 3H), 2.64-2.71 (m, 1H), 2.71-2.96 (m, 4H), 3.01-3.28 (m, 19H), 3.33-3.46 (m, 9H), 3.46-3.68 (m, 12H), 3.68-3.83 (m, 2H), 4.17-4.25 (m, 1H), 4.26-4.30 (m, 1H), 4.32-4.40 (m, 1H), 4.42-4.61 (m, 3H), 6.54-6.62 (m, 2H), 6.62-7.11 (br s, 2H, interfering with the next listed signal), 6.97-7.00 (m, 2H), 7.11-7.42 (br s, 2H, interfering with the next listed signal), 7.26-7.33 (m, 4H), 7.42-7.52 (m, 1H), 7.52-7.85 (m, 6H), 7.88-8.68 (m, 5H), 8.68-9.29 (m, 5H), 10.00-10.36 (m, 1H), 12.49 (br s, 1H), 13.28 (br s, 1H). HRMS:  $m/z$  [ $M+2H$ ]<sup>2+</sup> calcd. for [C<sub>77</sub>H<sub>117</sub>FGaN<sub>19</sub>O<sub>19</sub>]<sup>2+</sup> 849.9001, found 849.9012. RP-HPLC (220 nm): > 99% ( $t_R$  = 14.5 min, *k* = 18.1). C<sub>77</sub>H<sub>115</sub>FGaN<sub>19</sub>O<sub>19</sub> • C<sub>6</sub>H<sub>3</sub>F<sub>9</sub>O<sub>6</sub> (1699.60 + 342.07).

***N<sup>α</sup>*-Methyl-Arg-Arg-Pro-Tyr-2-((1*R*)-1-methylpropyl)-Gly-Leu tris(hydrotrifluoroacetate) (38).**

Peptide **38** was synthesized according to the general procedure for SPPS using a H-Leu-2-ClTrt resin (loading 0.79 mmol/g) (40 mg, 0.0316 mmol). Purification by preparative RP-HPLC (column: Gemini-NX C18, gradient: 0-5 min: A1/B1 95:5-90:10, 5-10 min: 90:10-80:20, 10-30 min: 80:20-60:40,  $t_R$  = 18 min) afforded **38**

as white fluffy solid (13.8 mg, 37%). <sup>1</sup>H-NMR (600 MHz, DMSO-*d*<sub>6</sub>): δ 0.74-0.80 (m, 3H), 0.82-0.87 (m, 6H), 0.88-0.92 (m, 3H), 1.00-1.09 (m, 1H), 1.32-1.40 (m, 1H), 1.40-1.59 (m, 7H), 1.59-1.89 (m, 8H), 1.95-2.04 (m, 1H), 2.42-2.48 (m, 3H), 2.65-2.75 (m, 1H), 2.85-2.92 (m, 1H), 3.04-3.16 (m, 4H), 3.53-3.64 (m, 2H), 3.74-3.83 (m, 1H), 4.18-4.26 (m, 1H), 4.32-4.39 (m, 2H), 4.41-4.60 (m, 2H), 6.59-6.63 (m, 2H), 6.63-7.18 (br s, 4H, interfering with the next listed signal), 6.99-7.01 (m, 2H), 7.19-7.60 (br s, 4H), 7.60-7.76 (m, 3H), 7.93 (d, 1H, *J* 7.9 Hz), 8.13 (d, 1H, *J* 7.7 Hz), 8.73-9.06 (m, 3H), 9.11-9.23 (m, 1H), 12.47 (br s, 1H). HRMS: *m/z* [*M*+2H]<sup>2+</sup> calcd. for [C<sub>39</sub>H<sub>68</sub>N<sub>12</sub>O<sub>8</sub>]<sup>2+</sup> 416.2636, found 416.2645. RP-HPLC (220 nm): 99% (*t*<sub>R</sub> = 6.7 min, *k* = 7.8). C<sub>39</sub>H<sub>66</sub>N<sub>12</sub>O<sub>8</sub> • C<sub>6</sub>H<sub>3</sub>F<sub>9</sub>O<sub>6</sub> (831.03 + 342.07).

***N*<sup>α</sup>-Methyl-Arg-Arg-Pro-Tyr-*α,α*-diethyl-Gly-Leu tris(hydrotrifluoroacetate) (39).**

Peptide **39** was synthesized according to the general procedure for SPPS using a H-Leu-2-ClTrt resin (loading 0.79 mmol/g) (40 mg, 0.0316 mmol). Purification by preparative RP-HPLC (column: Gemini-NX C18, gradient: 0-5 min: A1/B1 95:5-90:10, 5-10 min: 90:10-80:20, 10-30 min: 80:20-55:45, *t*<sub>R</sub> = 18 min) afforded **39** as white fluffy solid (9.1 mg, 25%). <sup>1</sup>H-NMR (600 MHz, DMSO-*d*<sub>6</sub>): δ 0.31-0.49 (m, 3H), 0.57-0.70 (m, 3H), 0.79-0.82 (m, 3H), 0.87-0.90 (m, 3H), 1.40-1.87 (m, 15H), 1.87-2.01 (m, 1H), 2.01-2.14 (m, 1H), 2.25-2.38 (m, 2H), 2.43-2.48 (m, 3H), 2.65-2.75 (m, 1H), 2.88-2.94 (m, 1H), 3.04-3.18 (m, 4H), 3.51-3.64 (m, 2H), 3.72-3.88 (m, 1H), 4.12-4.22 (m, 1H), 4.23-4.41 (m, 2H), 4.46-4.62 (m, 1H), 6.61-6.70 (m, 2H), 6.70-7.14 (br s, 4H, interfering with the next listed signal), 7.03-7.06 (m, 2H), 7.14-7.54 (br s, 4H, interfering with the next listed signal), 7.37-7.40 (m, 1H), 7.54-7.76 (m, 2H), 8.16 (d, 1H, *J* 7.9 Hz), 8.46 (d, 1H, *J* 7.4 Hz), 8.68-9.12 (m, 3H), 9.15-9.25 (m, 1H), 12.57 (br s, 1H). HRMS: *m/z* [*M*+2H]<sup>2+</sup> calcd. for [C<sub>39</sub>H<sub>68</sub>N<sub>12</sub>O<sub>8</sub>]<sup>2+</sup> 416.2636, found 416.2644. RP-HPLC (220 nm): 99% (*t*<sub>R</sub> = 7.4 min, *k* = 8.7). C<sub>39</sub>H<sub>66</sub>N<sub>12</sub>O<sub>8</sub> • C<sub>6</sub>H<sub>3</sub>F<sub>9</sub>O<sub>6</sub> (831.03 + 342.07).

***N*<sup>α</sup>-Methyl-Arg-Arg-Pro-Tyr-*α*-cyclopropyl-Gly-Leu tris(hydrotrifluoroacetate) (40).**

Peptide **40** was synthesized according to the general procedure for SPPS using a H-Leu-2-ClTrt resin (loading 0.79 mmol/g) (40 mg, 0.0316 mmol). Purification by preparative RP-HPLC (column: Gemini-NX C18, gradient: 0-5 min: A1/B1 95:5-90:10, 5-10 min: 90:10-80:20, 10-30 min: 80:20-55:45, *t*<sub>R</sub> = 15 min) afforded **40** as white fluffy solid (25.3 mg, 69%). <sup>1</sup>H-NMR (600 MHz, DMSO-*d*<sub>6</sub>): δ 0.29-0.35 (m, 1H), 0.35-0.42 (m, 2H), 0.42-0.48 (m, 1H), 0.83-0.87 (m, 3H), 0.87-0.92 (m, 3H), 0.99-1.05 (m, 1H), 1.42-1.87 (m, 14H), 1.96-2.06 (m, 1H), 2.42-2.48 (m, 3H), 2.65-2.73 (m, 1H), 2.84-2.91 (m, 1H), 3.06-3.15 (m, 4H), 3.54-3.63 (m, 2H), 3.76-3.86 (m, 1H), 3.91-3.98 (m, 1H), 4.21-4.30 (m, 1H), 4.30-4.37 (m, 1H), 4.37-4.44 (m, 1H), 4.46-4.58 (m, 1H), 6.55-6.65 (m, 2H), 6.65-7.13 (br s, 4H, interfering with the next listed signal), 6.99-7.02 (m, 2H), 7.13-7.56 (br s, 4H), 7.56-7.72 (m, 2H), 7.79-8.01 (m, 2H), 8.08-8.19 (m, 1H), 8.73-9.04 (m, 3H), 9.18 (s,

1H), 12.54 (br s, 1H). HRMS:  $m/z$   $[M+2H]^{2+}$  calcd. for  $[C_{38}H_{64}N_{12}O_8]^{2+}$  408.2480, found 408.2487. RP-HPLC (220 nm): 97% ( $t_R$  = 5.2 min,  $k$  = 5.8).  $C_{38}H_{62}N_{12}O_8 \cdot C_6H_3F_9O_6$  (814.99 + 342.07).

***N*<sup>α</sup>-Methyl-Arg-Arg-Pro-Tyr-β-cyclopropyl-Ala-Leu tris(hydrotrifluoroacetate) (41).**

Peptide **41** was synthesized according to the general procedure for SPPS using a H-Leu-2-ClTrt resin (loading 0.79 mmol/g) (40 mg, 0.0316 mmol). Purification by preparative RP-HPLC (column: Gemini-NX C18, gradient: 0-5 min: A1/B1 95:5-90:10, 5-10 min: 90:10-78:22, 10-30 min: 78:22-50:50,  $t_R$  = 16 min) afforded **41** as white fluffy solid (17.5 mg, 47%). <sup>1</sup>H-NMR (600 MHz, DMSO-*d*<sub>6</sub>): δ 0.02-0.15 (m, 2H), 0.27-0.44 (m, 2H), 0.62-0.77 (m, 1H), 0.82-0.93 (m, 6H), 1.36-1.89 (m, 16H), 1.95-2.05 (m, 1H), 2.40-2.48 (m, 3H), 2.66-2.75 (m, 1H), 2.86-2.92 (m, 1H), 3.05-3.14 (m, 4H), 3.54-3.55 (m, 1H), 3.60-3.62 (m, 1H), 3.75-3.80 (m, 1H), 4.21-4.29 (m, 1H), 4.29-4.44 (m, 3H), 4.49-4.60 (m, 1H), 6.57-6.62 (m, 2H), 6.62-7.12 (br s, 4H, interfering with the next listed signal), 7.00-7.02 (m, 2H), 7.12-7.57 (br s, 4H), 7.57-7.73 (m, 2H), 7.77-7.96 (m, 2H), 8.11-8.21 (m, 1H), 8.74-9.03 (m, 3H), 9.09-9.27 (m, 1H), 12.55 (br s, 1H). HRMS:  $m/z$   $[M+3H]^{3+}$  calcd. for  $[C_{39}H_{67}N_{12}O_8]^{3+}$  277.1729, found 277.1739. RP-HPLC (220 nm): 98% ( $t_R$  = 5.9 min,  $k$  = 6.8).  $C_{39}H_{64}N_{12}O_8 \cdot C_6H_3F_9O_6$  (829.02 + 342.07).

***N*<sup>α</sup>-Methyl-Arg-Arg-Pro-Tyr-α-cyclobutyl-Gly-Leu tris(hydrotrifluoroacetate) (42).**

Peptide **42** was synthesized according to the general procedure for SPPS using a H-Leu-2-ClTrt resin (loading 0.79 mmol/g) (40 mg, 0.0316 mmol). Purification by preparative RP-HPLC (column: Gemini-NX C18, gradient: 0-5 min: A1/B1 95:5-90:10, 5-10 min: 90:10-78:22, 10-30 min: 78:22-50:50,  $t_R$  = 15 min) afforded **42** as white fluffy solid (27.6 mg, 74%). <sup>1</sup>H-NMR (600 MHz, DMSO-*d*<sub>6</sub>): δ 0.81-0.93 (m, 6H), 1.37-1.95 (m, 20H), 1.95-2.06 (m, 1H), 2.44-2.48 (m, 3H), 2.52-2.54 (m, 1H), 2.66-2.74 (m, 1H), 2.84-2.91 (m, 1H), 3.05-3.14 (m, 4H), 3.54-3.62 (m, 2H), 3.76-3.86 (m, 1H), 4.17-4.26 (m, 1H), 4.27-4.38 (m, 2H), 4.38-4.45 (m, 1H), 4.48-4.59 (m, 1H), 6.57-6.63 (m, 2H), 6.63-7.15 (br s, 4H, interfering with the next listed signal), 6.99-7.01 (m, 2H), 7.15-7.58 (br s, 4H), 7.58-7.71 (m, 2H), 7.76-7.83 (m, 1H), 7.86-7.95 (m, 1H), 8.11-8.22 (m, 1H), 8.71-9.07 (m, 3H), 9.09-9.24 (m, 1H), 12.51 (br s, 1H). HRMS:  $m/z$   $[M+3H]^{3+}$  calcd. for  $[C_{39}H_{67}N_{12}O_8]^{3+}$  277.1729, found 277.1738. RP-HPLC (220 nm): 99% ( $t_R$  = 6.0 min,  $k$  = 6.9).  $C_{39}H_{64}N_{12}O_8 \cdot C_6H_3F_9O_6$  (829.02 + 342.07).

***N*<sup>α</sup>-Methyl-Arg-Arg-Pro-Tyr-α-cyclopentyl-Gly-Leu tris(hydrotrifluoroacetate) (43).**

Peptide **43** was synthesized according to the general procedure for SPPS using a H-Leu-2-ClTrt resin (loading 0.79 mmol/g) (40 mg, 0.0316 mmol). Purification by preparative RP-HPLC (column: Gemini-NX C18, gradient: 0-5 min: A1/B1 95:5-90:10, 5-10 min: 90:10-80:20, 10-30 min: 80:20-55:45,  $t_R$  = 17 min) afforded **43** as white fluffy solid (26.8 mg, 71%). <sup>1</sup>H-NMR (600 MHz, DMSO-*d*<sub>6</sub>): δ 0.81-0.93 (m, 6H), 1.20-1.27 (m,

1H), 1.31-1.39 (m, 1H), 1.39-1.89 (m, 20H), 1.95-2.06 (m, 1H), 2.08-2.15 (m, 1H), 2.44-2.48 (m, 3H), 2.64-2.71 (m, 1H), 2.83-2.91 (m, 1H), 3.05-3.14 (m, 4H), 3.54-3.63 (m, 2H), 3.75-3.86 (m, 1H), 4.16-4.29 (m, 2H), 4.29-4.60 (m, 3H), 6.57-6.62 (m, 2H), 6.62-7.13 (br s, 4H, interfering with the next listed signal), 6.98-7.01 (m, 2H), 7.13-7.56 (br s, 4H), 7.56-7.71 (m, 2H), 7.79-7.93 (m, 2H), 8.16-8.26 (m, 1H), 8.72-9.03 (m, 3H), 9.09-9.26 (m, 1H), 12.49 (br s, 1H). HRMS:  $m/z$   $[M+3H]^{3+}$  calcd. for  $[C_{40}H_{69}N_{12}O_8]^{3+}$  281.8448, found 281.8457. RP-HPLC (220 nm): 99% ( $t_R$  = 6.8 min,  $k$  = 7.9).  $C_{40}H_{66}N_{12}O_8 \cdot C_6H_3F_9O_6$  (843.04 + 342.07).

***N*<sup>α</sup>-Methyl-Arg-Arg-Pro-Tyr- $\alpha$ -methyl-Leu-Leu tris(hydrotrifluoroacetate) (44).**

Peptide **44** was synthesized according to the general procedure for SPPS using a H-Leu-2-ClTrt resin (loading 0.79 mmol/g) (40 mg, 0.0316 mmol). Purification by preparative RP-HPLC (column: Gemini-NX C18, gradient: 0-5 min: A1/B1 95:5-90:10, 5-10 min: 90:10-75:25, 10-30 min: 75:25-45:55,  $t_R$  = 16 min) afforded **44** as white fluffy solid (26.3 mg, 70%). <sup>1</sup>H-NMR (600 MHz, DMSO-*d*<sub>6</sub>):  $\delta$  0.70-0.89 (m, 12H), 1.27-1.38 (m, 3H), 1.38-1.91 (m, 16H), 1.98-2.08 (m, 1H), 2.18-2.28 (m, 1H), 2.45-2.48 (m, 3H), 2.62-2.70 (m, 1H), 2.86-2.95 (m, 1H), 3.05-3.15 (m, 4H), 3.53-3.63 (m, 2H), 3.74-3.85 (m, 1H), 4.13-4.24 (m, 1H), 4.27-4.39 (m, 2H), 4.44-4.59 (m, 1H), 6.61-6.66 (m, 2H), 6.66-7.13 (br s, 4H, interfering with the next listed signal), 7.01-7.05 (m, 2H), 7.13-7.53 (br s, 4H), 7.53-7.72 (m, 3H), 8.04-8.12 (m, 1H), 8.31-8.37 (m, 1H), 8.74-9.03 (m, 3H), 9.14-9.23 (m, 1H), 12.55 (br s, 1H). HRMS:  $m/z$   $[M+3H]^{3+}$  calcd. for  $[C_{40}H_{71}N_{12}O_8]^{3+}$  282.5167, found 282.5175. RP-HPLC (220 nm): 99% ( $t_R$  = 8.3 min,  $k$  = 9.9).  $C_{40}H_{68}N_{12}O_8 \cdot C_6H_3F_9O_6$  (845.06 + 342.07).

***N*<sup>α</sup>-Methyl-Arg-Arg-Pro-Tyr- $\alpha$ -ethyl-D-Ala-Leu tris(hydrotrifluoroacetate) (45).**

Peptide **45** was synthesized according to the general procedure for SPPS using a H-Leu-2-ClTrt resin (loading 0.79 mmol/g) (40 mg, 0.0316 mmol). Purification by preparative RP-HPLC (column: Gemini-NX C18, gradient: 0-5 min: A1/B1 95:5-90:10, 5-10 min: 90:10-80:20, 10-30 min: 80:20-60:40,  $t_R$  = 17 min) afforded **45** as white fluffy solid (26.3 mg, 72%). <sup>1</sup>H-NMR (600 MHz, DMSO-*d*<sub>6</sub>):  $\delta$  0.58-0.72 (m, 3H), 0.80-0.91 (m, 6H), 1.35 (s, 3H), 1.40-1.89 (m, 15H), 1.98-2.07 (m, 1H), 2.12-2.21 (m, 1H), 2.45-2.48 (m, 3H), 2.65-2.75 (m, 1H), 2.88-2.95 (m, 1H), 3.05-3.18 (m, 4H), 3.49-3.68 (m, 2H), 3.70-3.87 (m, 1H), 4.19-4.39 (m, 3H), 4.48-4.59 (m, 1H), 6.61-6.67 (m, 2H), 6.67-7.13 (br s, 4H, interfering with the next listed signal), 7.01-7.05 (m, 2H), 7.13-7.51 (br s, 4H), 7.51-7.74 (m, 3H), 7.82-7.97 (m, 1H), 8.12-8.22 (m, 1H), 8.73-9.05 (m, 3H), 9.14-9.25 (m, 1H), 12.51 (br s, 1H). HRMS:  $m/z$   $[M+3H]^{3+}$  calcd. for  $[C_{38}H_{67}N_{12}O_8]^{3+}$  273.1729, found 273.1738. RP-HPLC (220 nm): 98% ( $t_R$  = 6.4 min,  $k$  = 7.4).  $C_{38}H_{64}N_{12}O_8 \cdot C_6H_3F_9O_6$  (817.01 + 342.07).

***N*<sup>α</sup>-Methyl-Arg-Arg-Pro-Tyr-Ile- $\beta$ -cyclopropyl-Ala tris(hydrotrifluoroacetate) (46).**

Peptide **46** was synthesized on a 2-ClTrt-Cl resin (loading 1.6 mmol/g) (40 mg, 0.064 mmol, 1 equiv.). The resin was treated with a solution of Fmoc- $\beta$ -cyclopropyl-Ala-OH (45.0 mg, 0.128 mmol, 2 equiv.) and DIPEA

(111.5  $\mu$ L, 0.64 mmol, 10 equiv.) in  $\text{CH}_2\text{Cl}_2$  (0.5 mL) at 35  $^\circ\text{C}$  for 15 h. MeOH (65  $\mu$ L) and  $\text{CH}_2\text{Cl}_2$  (100  $\mu$ L) were added and shaking was continued at rt for 15 min. The liquid was removed by filtration and the resin was washed with  $\text{CH}_2\text{Cl}_2$  (3  $\times$ ), MeOH (3  $\times$ ) and DMF/NMP (80:20 v/v) (4  $\times$ ). Fmoc-deprotection of  $\beta$ -cyclopropyl-Ala and further SPPS was performed according to the general procedure for SPPS (note: the amounts of Fmoc-amino acids and coupling reagents were calculated based on the assumption that the loading of the resin with  $\beta$ -cyclopropyl-Ala was 50% compared to the original loading, i.e. 0.8 mmol/g). Purification by preparative RP-HPLC (column: Gemini-NX C18, gradient: 0-5 min: A1/B1 95:5-90:10, 5-10 min: 90:10-80:20, 10-30 min: 80:20-55:45,  $t_R$  = 15 min) afforded **46** as white fluffy solid (27.4 mg, 37%).  $^1\text{H}$ -NMR (600 MHz,  $\text{DMSO}-d_6$ ):  $\delta$  0.01-0.17 (m, 2H), 0.32-0.44 (m, 2H), 0.71-0.89 (m, 7H), 1.00-1.10 (m, 1H), 1.37-1.90 (m, 15H), 1.94-2.06 (m, 1H), 2.43-2.48 (m, 3H), 2.63-2.73 (m, 1H), 2.83-2.91 (m, 1H), 3.04-3.14 (m, 4H), 3.54-3.63 (m, 2H), 3.75-4.86 (m, 1H), 4.18-4.27 (m, 2H), 4.27-4.39 (m, 1H), 4.39-4.59 (m, 2H), 6.57-6.64 (m, 2H), 6.64-7.13 (br s, 4H, interfering with the next listed signal), 6.99-7.01 (m, 2H), 7.13-7.56 (br s, 4H), 7.56-7.79 (m, 3H), 7.93 (d, 1H,  $J$  8.0 Hz), 8.18-8.34 (m, 1H), 8.70-9.23 (m, 4H), 12.52 (br s, 1H). HRMS:  $m/z$   $[M+3\text{H}]^{3+}$  calcd. for  $[\text{C}_{39}\text{H}_{67}\text{N}_{12}\text{O}_8]^{3+}$  277.1729, found 277.1741. RP-HPLC (220 nm): 99% ( $t_R$  = 5.3 min,  $k$  = 6.0).  $\text{C}_{39}\text{H}_{64}\text{N}_{12}\text{O}_8 \cdot \text{C}_6\text{H}_3\text{F}_9\text{O}_6$  (829.02 + 342.07).

#### ***N* $^\alpha$ -Methyl-Arg-Arg-Pro-Tyr-Ile- $\alpha$ -methyl-Leu tris(hydrotrifluoroacetate) (**47**).**

Peptide **47** was synthesized on a 2-ClTrt-Cl resin (loading 1.6 mmol/g) (40 mg, 0.064 mmol, 1 equiv.). The resin was treated with a solution of Fmoc- $\alpha$ -methyl-Leu-OH (47.0 mg, 0.128 mmol, 2 equiv.) and DIPEA (111.5  $\mu$ L, 0.64 mmol, 10 equiv.) in  $\text{CH}_2\text{Cl}_2$  (0.5 mL) at 35  $^\circ\text{C}$  for 15 h. MeOH (65  $\mu$ L) was added and shaking was continued at rt for 15 min. The liquid was removed by filtration and the resin was washed with  $\text{CH}_2\text{Cl}_2$  (3  $\times$ ), MeOH (3  $\times$ ) and DMF/NMP (80:20 v/v) (4  $\times$ ). Fmoc-deprotection of  $\alpha$ -methyl-Leu and further SPPS was performed according to the general procedure for SPPS (note: the amounts of Fmoc-amino acids and coupling reagents were calculated based on the assumption that the loading of the resin with  $\alpha$ -methyl-Leu was 50% compared to the original loading, i.e. 0.8 mmol/g). Purification by preparative RP-HPLC (column: Gemini-NX C18, gradient: 0-5 min: A1/B1 95:5-90:10, 5-10 min: 90:10-75:25, 10-30 min: 75:25-45:55,  $t_R$  = 16 min) afforded **47** as white fluffy solid (11.7 mg, 15%).  $^1\text{H}$ -NMR (600 MHz,  $\text{DMSO}-d_6$ ):  $\delta$  0.77-0.87 (m, 12H), 1.00-1.09 (m, 1H), 1.35-1.87 (m, 19H), 1.96-2.05 (m, 1H), 2.45-2.48 (m, 3H), 2.63-2.74 (m, 1H), 2.83-2.92 (m, 1H), 3.06-3.16 (m, 4H), 3.52-3.64 (m, 2H), 3.74-3.88 (m, 1H), 4.16-4.22 (m, 1H), 4.28-4.38 (m, 1H), 4.39-4.59 (m, 2H), 6.59-6.64 (m, 2H), 6.64-7.14 (br s, 4H, interfering with the next listed signal), 7.00-7.03 (m, 2H), 7.14-7.57 (br s, 4H), 7.57-7.71 (m, 2H), 7.74-7.86 (m, 2H), 7.91 (d, 1H,  $J$  8.0 Hz), 8.73-9.06 (m, 3H), 9.08-9.24 (m, 1H), 12.51 (br s, 1H). HRMS:  $m/z$   $[M+3\text{H}]^{3+}$  calcd. for  $[\text{C}_{40}\text{H}_{71}\text{N}_{12}\text{O}_8]^{3+}$  282.5167, found 282.5175. RP-HPLC (220 nm): > 99% ( $t_R$  = 8.1 min,  $k$  = 9.7).  $\text{C}_{40}\text{H}_{68}\text{N}_{12}\text{O}_8 \cdot \text{C}_6\text{H}_3\text{F}_9\text{O}_6$  (845.06 + 342.07).



***N*<sup>α</sup>-Methyl-Arg-Arg-Pro-β,β-dimethyl-Tyr-Ile-Leu tris(hydrotrifluoroacetate) (48) and *N*<sup>α</sup>-Methyl-Arg-Arg-Pro-β,β-dimethyl-D-Tyr-Ile-Leu tris(hydrotrifluoroacetate) (49).**

Peptides **48** and **49** were synthesized according to the general procedure for SPPS using a H-Leu-2-ClTrt resin (loading 0.79 mmol/g) (40 mg, 0.0316 mmol). Purification by preparative RP-HPLC (column: Gemini-NX C18, gradient: 0-5 min: A1/B1 95:5-90:10, 5-10 min: 90:10-73:27, 10-30 min: 73:27-63:37, **48**: *t<sub>R</sub>* = 14 min, **49**: *t<sub>R</sub>* = 15 min) afforded the epimers **48** and **49** as white fluffy solids (**48**: 16.7 mg, 44%, **49**: 11.8 mg, 31%). **48**: <sup>1</sup>H-NMR (600 MHz, DMSO-*d*<sub>6</sub>): δ 0.74-0.86 (m, 9H), 0.88-0.92 (m, 3H), 0.96-1.05 (m, 1H), 1.20-1.31 (m, 6H), 1.37-1.60 (m, 8H), 1.60-1.93 (m, 9H), 2.46-2.49 (m, 3H), 3.06-3.15 (m, 4H), 3.49-3.52 (m, 1H), 3.56-3.61 (m, 1H), 3.76-3.90 (m, 1H), 4.03-4.17 (m, 1H), 4.17-4.27 (m, 1H), 4.37-4.44 (m, 1H), 4.52-4.60 (m, 1H), 4.61-4.68 (m, 1H), 6.59-6.65 (m, 2H), 6.65-7.17 (br s, 4H, interfering with the next listed signal), 7.11-7.14 (m, 2H), 7.17-7.60 (br s, 4H, interfering with the next listed signal), 7.32-7.34 (m, 1H), 7.60-7.72 (m, 3H), 8.08-8.16 (m, 1H), 8.79-9.06 (m, 3H), 9.08-9.21 (m, 1H), 12.48 (br s, 1H). HRMS: *m/z* [*M*+3H]<sup>3+</sup> calcd. for [C<sub>41</sub>H<sub>73</sub>N<sub>12</sub>O<sub>8</sub>]<sup>3+</sup> 287.1886, found 287.1896. RP-HPLC (220 nm): 97% (*t<sub>R</sub>* = 7.3 min, *k* = 8.6). C<sub>41</sub>H<sub>70</sub>N<sub>12</sub>O<sub>8</sub> • C<sub>6</sub>H<sub>3</sub>F<sub>9</sub>O<sub>6</sub> (859.09 + 342.07). **49**: <sup>1</sup>H-NMR (600 MHz, DMSO-*d*<sub>6</sub>): δ 0.72-0.81 (m, 6H), 0.82-0.86 (m, 3H), 0.87-0.97 (m, 4H), 1.20-1.25 (m, 3H), 1.25-1.35 (m, 5H), 1.40-1.60 (m, 8H), 1.60-1.83 (m, 7H), 2.46-2.48 (m, 3H), 3.04-3.14 (m, 4H), 3.45-3.48 (m, 1H), 3.53-3.57 (m, 1H), 3.73-3.81 (m, 1H), 4.08-4.19 (m, 2H), 4.36-4.43 (m, 1H), 4.46-4.55 (m, 1H), 4.86-4.92 (m, 1H), 6.58-6.65 (m, 2H), 6.65-7.11 (br s, 4H), 7.11-7.57 (br s, 4H, interfering with the next listed signal), 7.15-7.17 (m, 2H), 7.57-7.77 (m, 4H), 8.21 (d, 1H, *J* 7.1 Hz), 8.75-9.06 (m, 3H), 9.09-9.17 (m, 1H), 12.45 (br s, 1H). HRMS: *m/z* [*M*+3H]<sup>3+</sup> calcd. for [C<sub>41</sub>H<sub>73</sub>N<sub>12</sub>O<sub>8</sub>]<sup>3+</sup> 287.1886, found 287.1894. RP-HPLC (220 nm): 99% (*t<sub>R</sub>* = 9.3 min, *k* = 11.2). C<sub>41</sub>H<sub>70</sub>N<sub>12</sub>O<sub>8</sub> • C<sub>6</sub>H<sub>3</sub>F<sub>9</sub>O<sub>6</sub> (859.09 + 342.07).

***N*<sup>α</sup>-Methyl-*N*<sup>ω</sup>-[(4-aminobutyl)aminocarbonyl]Arg-Arg-Pro-β,β-dimethyl-Tyr-Ile-Leu tetrakis(hydrotrifluoroacetate) (50) and *N*<sup>α</sup>-Methyl-*N*<sup>ω</sup>-[(4-aminobutyl)aminocarbonyl]Arg-Arg-Pro-β,β-dimethyl-D-Tyr-Ile-Leu tetrakis(hydrotrifluoroacetate) (51).**

Peptides **50** and **51** were synthesized according to the general procedure for SPPS using a H-Leu-2-ClTrt resin (loading 0.79 mmol/g) (40 mg, 0.0316 mmol), with the following modification: after coupling of arginine building block **6** and Fmoc-deprotection, the resin was washed with CH<sub>2</sub>Cl<sub>2</sub> (5 ×), a solution of 2-nitrobenzenesulfonylchloride (21.0 mg, 0.095 mmol) and collidine (20.9 μL, 0.158 mmol) in CH<sub>2</sub>Cl<sub>2</sub> (0.75 mL) was added and the mixture was shaken at rt for 2 h. The resin was washed with DMF (5 ×), and a solution of MTBD (18.2 μL, 0.126 mmol) and methyl-4-nitrobenzenesulfonate (34.3 mg, 0.158 mmol) in DMF (0.9 mL) was added. After shaking at rt for 30 min, the resin was washed with DMF (3 ×) followed by the addition of a solution of DBU (23.6 μL, 0.158 mmol) and 2-mercaptoethanol (22.0 μL, 0.316 mmol) in DMF (0.75 mL) and shaking at rt for 30 min. The resin was washed with DMF (5 ×) followed by cleavage from the resin as

described in the general procedure for SPPS. Purification by preparative RP-HPLC (column: Gemini-NX C18, gradient: 0-5 min: A1/B1 85:15-80:20, 5-8 min: 80:20-73:27, 8-35 min: 73:27-70:30, **50**:  $t_R$  = 11 min, **51**:  $t_R$  = 12 min) afforded the epimers **50** and **51** as white fluffy solids (**50**: 11.5 mg, 25%, **51**: 7.9 mg, 17%). **50**:  $^1\text{H}$ -NMR (600 MHz, DMSO- $d_6$ ):  $\delta$  0.73-0.96 (m, 12H), 0.96-1.06 (m, 1H), 1.15-1.33 (m, 6H), 1.33-1.96 (m, 21H), 2.46-2.49 (m, 3H), 2.75-2.82 (m, 2H), 3.04-3.20 (m, 4H), 3.20-3.32 (m, 2H), 3.44-3.63 (m, 2H), 3.80-3.93 (m, 1H), 4.08-4.18 (m, 1H), 4.20-4.27 (m, 1H), 4.38-4.44 (m, 1H), 4.51-4.69 (m, 2H), 6.58-6.65 (m, 2H), 6.79-7.27 (br s, 2H, interfering with the next listed signal), 7.11-7.14 (m, 2H), 7.27-7.30 (m, 1H), 7.30-7.72 (br s, 2H, interfering with the next listed signal), 7.55-7.68 (m, 2H), 7.72-7.91 (m, 4H), 8.06-8.16 (m, 1H), 8.31-8.73 (m, 2H), 8.80-9.39 (m, 5H), 10.61-10.87 (m, 1H), 12.50 (br s, 1H).  $^{13}\text{C}$ -NMR (151 MHz, DMSO- $d_6$ ):  $\delta$  10.9, 15.1, 21.1, 23.0, 23.4, 24.2, 24.2, 24.2, 24.4, 24.5, 24.5, 26.0, 26.9, 27.0, 28.1, 28.6, 31.1, 36.7, 38.5, 38.6, 39.8, 40.1, 40.2, 40.4, 46.9, 50.0, 50.5, 56.6, 59.3, 59.8, 59.8, 114.3 (2 carbon atoms), 116.0 (TFA), 117.9 (TFA), 119.9, 127.4 (2 carbon atoms), 136.2, 153.9, 155.3, 156.9, 158.8 (q,  $J$  32 Hz) (TFA), 167.0, 169.4, 169.4, 170.6, 170.7, 173.9. HRMS:  $m/z$   $[M+H]^+$  calcd. for  $[\text{C}_{46}\text{H}_{81}\text{N}_{14}\text{O}_9]^+$  973.6305, found 973.6309. RP-HPLC (220 nm): 97% ( $t_R$  = 7.1 min,  $k$  = 8.3).  $\text{C}_{46}\text{H}_{80}\text{N}_{14}\text{O}_9 \cdot \text{C}_8\text{H}_4\text{F}_{12}\text{O}_8$  (973.24 + 456.09). **51**:  $^1\text{H}$ -NMR (600 MHz, DMSO- $d_6$ ):  $\delta$  0.71-0.96 (m, 13H), 1.18-1.37 (m, 8H), 1.42-1.86 (m, 19H), 2.44-2.49 (m, 3H), 2.75-2.84 (m, 2H), 3.02-3.18 (m, 4H), 3.20-3.29 (m, 2H), 3.43-3.50 (m, 1H), 3.50-3.59 (m, 1H), 3.76-3.84 (m, 1H), 4.08-4.19 (m, 2H), 4.35-4.43 (m, 1H), 4.47-4.56 (m, 1H), 4.84-4.90 (m, 1H), 6.60-6.64 (m, 2H), 6.64-7.24 (br s, 2H, interfering with the next listed signal), 7.14-7.17 (m, 2H), 7.24-7.55 (br s, 2H), 7.55-7.73 (m, 3H), 7.73-7.90 (m, 4H), 8.12-8.24 (m, 1H), 8.31-8.71 (m, 2H), 8.79-9.01 (m, 2H), 9.01-9.34 (m, 3H), 10.66-10.88 (m, 1H), 12.48 (br s, 1H).  $^{13}\text{C}$ -NMR (151 MHz, DMSO- $d_6$ ):  $\delta$  11.1, 15.3, 21.5, 22.7, 23.4, 23.9, 24.0, 24.2, 24.3, 24.4, 24.5, 26.0, 26.3, 26.9, 28.1, 29.3, 31.1, 37.0, 38.5, 38.6, 39.7, 40.1, 40.4, 41.0, 46.7, 50.6, 50.6, 56.5, 59.2, 59.5, 59.8, 114.4 (2 carbon atoms), 116.0 (TFA), 117.9 (TFA), 119.9, 127.3 (2 carbon atoms), 136.8, 153.9, 155.4, 156.9, 158.8 (q,  $J$  32 Hz) (TFA), 166.9, 168.9, 169.4, 170.2, 171.2, 173.9. HRMS:  $m/z$   $[M+H]^+$  calcd. for  $[\text{C}_{46}\text{H}_{81}\text{N}_{14}\text{O}_9]^+$  973.6305, found 973.6307. RP-HPLC (220 nm): 95% ( $t_R$  = 8.5 min,  $k$  = 10.2).  $\text{C}_{46}\text{H}_{80}\text{N}_{14}\text{O}_9 \cdot \text{C}_8\text{H}_4\text{F}_{12}\text{O}_8$  (973.24 + 456.09).

***N*<sup>α</sup>-Methyl-*N*<sup>ω</sup>-[(4-aminobutyl)aminocarbonyl]Arg-Arg-Pro-β,β-dimethyl-Tyr-α-*tert*-butyl-Gly-Leu tetrakis(hydrotrifluoroacetate) (**52**) and *N*<sup>α</sup>-Methyl-*N*<sup>ω</sup>-[(4-aminobutyl)aminocarbonyl]Arg-Arg-Pro-β,β-dimethyl-D-Tyr-α-*tert*-butyl-Gly-Leu tetrakis(hydrotrifluoroacetate) (**53**).**

Peptides **52** and **53** were synthesized according to the general procedure for SPPS using a H-Leu-2-ClTrt resin (loading 0.79 mmol/g) (25 mg, 0.01975 mmol), with the following modification: after coupling of arginine building block **6** and Fmoc-deprotection, the resin was washed with  $\text{CH}_2\text{Cl}_2$  (5 ×), a solution of 2-nitrobenzenesulfonylchloride (13.1 mg, 0.059 mmol) and collidine (13.1  $\mu\text{L}$ , 0.099 mmol) in  $\text{CH}_2\text{Cl}_2$  (0.5 mL) was added and the mixture was shaken at rt for 2 h. The resin was washed with DMF (5 ×), and a solution of

MTBD (11.3  $\mu$ L, 0.079 mmol) and methyl-4-nitrobenzenesulfonate (21.4 mg, 0.099 mmol) in DMF (0.6 mL) was added. After shaking at rt for 30 min, the resin was washed with DMF (3  $\times$ ) followed by the addition of a solution of DBU (14.7  $\mu$ L, 0.099 mmol) and 2-mercaptoethanol (13.8  $\mu$ L, 0.198 mmol) in DMF (0.5 mL) and shaking at rt for 30 min. The resin was washed with DMF (5  $\times$ ) followed by cleavage from the resin as described in the general procedure for SPPS. Purification by preparative RP-HPLC (column: Gemini-NX C18, gradient: 0-5 min: A1/B1 85:15-80:20, 5-8 min: 80:20-73:27, 8-35 min: 73:27-70:30, **52**:  $t_R$  = 11 min, **53**:  $t_R$  = 12 min) afforded the epimers **52** and **53** as white fluffy solids (**52**: 5.2 mg, 19%, **53**: 5.0 mg, 18%). **52**:  $^1\text{H}$ -NMR (600 MHz, DMSO- $d_6$ ):  $\delta$  0.79-0.94 (m, 15H), 1.19-1.32 (m, 6H), 1.44-1.84 (m, 18H), 1.86-1.95 (m, 1H), 2.47-2.49 (m, 3H), 2.76-2.81 (m, 2H), 3.07-3.14 (m, 4H), 3.24-3.28 (m, 2H), 3.50-3.52 (m, 1H), 3.56-3.60 (m, 1H), 3.78-3.85 (m, 1H), 4.18-4.29 (m, 2H), 4.40-4.45 (m, 1H), 4.53-4.61 (m, 1H), 4.68-4.74 (m, 1H), 6.57-6.65 (m, 2H), 6.70-7.09 (br s, 2H), 7.09-7.15 (m, 2H), 7.15-7.51 (br s, 2H, interfering with the next listed signal), 7.37-7.45 (m, 2H), 7.53-7.78 (m, 5H), 8.12-8.18 (m, 1H), 8.31-8.64 (m, 2H), 8.78-9.22 (m, 5H), 10.16-10.53 (m, 1H), 12.46 (br s, 1H). HRMS:  $m/z$   $[M+H]^+$  calcd. for  $[\text{C}_{46}\text{H}_{81}\text{N}_{14}\text{O}_9]^+$  973.6305, found 973.6303. RP-HPLC (220 nm): 98% ( $t_R$  = 7.1 min,  $k$  = 8.3).  $\text{C}_{46}\text{H}_{80}\text{N}_{14}\text{O}_9 \cdot \text{C}_8\text{H}_4\text{F}_{12}\text{O}_8$  (973.24 + 456.09). **53**:  $^1\text{H}$ -NMR (600 MHz, DMSO- $d_6$ ):  $\delta$  0.78-0.91 (m, 15H), 1.19-1.32 (m, 7H), 1.42-1.80 (m, 18H), 2.42-2.48 (m, 3H), 2.77-2.83 (m, 2H), 3.06-3.15 (m, 4H), 3.22-3.26 (m, 2H), 3.48-3.54 (m, 2H), 3.75-3.83 (m, 1H), 4.09-4.23 (m, 2H), 4.37-4.42 (m, 1H), 4.47-4.56 (m, 1H), 4.87-4.94 (m, 1H), 6.60-6.65 (m, 2H), 6.65-7.13 (br s, 2H), 7.13-7.19 (m, 2H), 7.19-7.53 (br s, 2H, interfering with the next listed signal), 7.44-7.49 (m, 1H), 7.53-7.87 (m, 6H), 8.16-8.26 (m, 1H), 8.33-8.65 (m, 2H), 8.70-9.21 (m, 5H), 10.29-10.63 (m, 1H), 12.44 (br s, 1H). HRMS:  $m/z$   $[M+H]^+$  calcd. for  $[\text{C}_{46}\text{H}_{81}\text{N}_{14}\text{O}_9]^+$  973.6305, found 973.6307. RP-HPLC (220 nm): 93% ( $t_R$  = 8.5 min,  $k$  = 10.2).  $\text{C}_{46}\text{H}_{80}\text{N}_{14}\text{O}_9 \cdot \text{C}_8\text{H}_4\text{F}_{12}\text{O}_8$  (973.24 + 456.09).

***N* <sup>$\alpha$</sup> -Methyl-*N* <sup>$\omega$</sup> -{[4-(*N*-{2-[4,7,10-tris(carboxymethyl)-1,4,7,10-tetraazacyclododecan-1-yl]acetyl})aminobutyl]aminocarbonyl}Arg-Arg-Pro- $\beta,\beta$ -dimethyl-Tyr-Ile-Leu tetrakis(hydrotrifluoroacetate) (**54**).**

Compound **54** was prepared from **50** (9.7 mg, 6.79  $\mu$ mol) and **13** (5.54 mg, 6.79  $\mu$ mol) according to the general procedure for DOTA-conjugation (modification: stirring of the mixture for 45 min instead for 30 min). Isolation of the protected intermediate: column: Gemini-NX C18, gradient: 0-5 min: A1/B1 90:10-80:20, 5-10 min: 80:20-72:28, 10-20 min: 72:28-60:40,  $t_R$  = 19 min. Purification of the product by preparative RP-HPLC (column: Gemini-NX C18, gradient: 0-5 min: A1/B1 90:10-80:20, 5-10 min: 80:20-72:28, 10-20 min: 72:28-60:40,  $t_R$  = 11 min) afforded **54** as white fluffy solid (9.4 mg, 76%).  $^1\text{H}$ -NMR (600 MHz, DMSO- $d_6$ ):  $\delta$  0.73-0.95 (m, 12H), 0.96-1.04 (m, 1H), 1.19-1.30 (m, 6H), 1.36-1.94 (m, 21H), 2.47-2.49 (m, 3H), 3.06-3.25 (m, 17H), 3.56-3.96 (m, 18H), 4.10-4.13 (m, 1H), 4.21-4.25 (m, 1H), 4.39-4.44 (m, 1H), 4.53-4.59 (m, 1H), 4.61-4.67 (m, 1H), 6.59-6.64 (m, 2H), 6.64-7.17 (br s, 2H, interfering with the next listed signal), 7.10-7.14 (m, 2H), 7.17-7.57 (br s, 2H, interfering with the next listed signal), 7.30-7.34 (m, 1H), 7.57-7.71 (m, 2H), 8.07-

8.16 (m, 1H), 8.22-8.56 (m, 2H), 8.77-9.46 (m, 5H), 11.28-13.36 (m, 2H). 6 exchangeable protons (NH, OH) of the presumably 4-fold protonated molecule could not be identified. HRMS:  $m/z$   $[M+3H]^{3+}$  calcd. for  $[C_{62}H_{109}N_{18}O_{16}]^{3+}$  453.9417, found 453.9425. RP-HPLC (220 nm): 98% ( $t_R$  = 7.0 min,  $k$  = 8.2).  $C_{62}H_{106}N_{18}O_{16} \cdot C_8H_4F_{12}O_8$  (1359.64 + 456.09).

***N<sup>α</sup>*-Methyl-*N<sup>ω</sup>*-{[4-(N-{2-[4,7,10-tris(carboxymethyl)-1,4,7,10-tetraazacyclododecan-1-yl]acetyl})aminobutyl]aminocarbonyl}Arg-Arg-Pro-β,β-dimethyl-Tyr-α-*tert*-butyl-Gly-Leu tetrakis(hydrotrifluoroacetate) (55).**

Compound **55** was prepared from **52** (7.5 mg, 5.25 μmol) and **13** (4.28 mg, 5.25 μmol) according to the general procedure for DOTA-conjugation (modification: stirring of the mixture for 45 min instead for 30 min). Isolation of the protected intermediate: column: Gemini-NX C18, gradient: 0-5 min: A1/B1 90:10-80:20, 5-10 min: 80:20-72:28, 10-20 min: 72:28-60:40,  $t_R$  = 19 min. Purification of the product by preparative RP-HPLC (column: Gemini-NX C18, gradient: 0-5 min: A1/B1 90:10-80:20, 5-10 min: 80:20-72:28, 10-20 min: 72:28-60:40,  $t_R$  = 11 min) afforded **55** as white fluffy solid (7.5 mg, 79%). <sup>1</sup>H-NMR (600 MHz, DMSO-*d*<sub>6</sub>): δ 0.80-0.93 (m, 15H), 1.21-1.29 (m, 6H), 1.39-1.85 (m, 18H), 1.86-1.96 (m, 1H), 2.47-2.49 (m, 3H), 2.94-3.22 (m, 17H), 3.47-3.59 (m, 5H), 3.59-3.92 (m, 13H), 4.20-4.26 (m, 2H), 4.40-4.46 (m, 1H), 4.53-4.59 (m, 1H), 4.68-4.74 (m, 1H), 6.56-6.65 (m, 2H), 6.65-7.12 (br s, 2H), 7.12-7.15 (m, 2H), 7.15-7.60 (br s, 2H, interfering with the next listed signal), 7.37-7.45 (m, 2H), 7.60-7.70 (m, 1H), 8.12-8.19 (m, 1H), 8.25-8.58 (m, 2H), 8.78-9.49 (m, 5H), 11.65-13.27 (m, 2H). 6 exchangeable protons (NH, OH) of the presumably 4-fold protonated molecule could not be identified. HRMS:  $m/z$   $[M+3H]^{3+}$  calcd. for  $[C_{62}H_{109}N_{18}O_{16}]^{3+}$  453.9417, found 453.9428. RP-HPLC (220 nm): 98% ( $t_R$  = 7.0 min,  $k$  = 8.2).  $C_{62}H_{106}N_{18}O_{16} \cdot C_8H_4F_{12}O_8$  (1359.64 + 456.09).

***N<sup>α</sup>*-Methyl-*N<sup>ω</sup>*-{[4-(N-{2-[gallium(III)-4,7,10-tris(carboxymethyl)-1,4,7,10-tetraazacyclododecan-1-yl]acetyl})aminobutyl]aminocarbonyl}Arg-Arg-Pro-β,β-dimethyl-Tyr-Ile-Leu tris(hydrotrifluoroacetate) (56).**

Compound **56** was prepared from **54** (3.5 mg, 1.93 μmol) according to the general procedure for the insertion of Ga<sup>3+</sup>. Purification by preparative RP-HPLC (column: Gemini-NX C18, gradient: 0-5 min: A1/B1 90:10-80:20, 5-10 min: 80:20-72:28, 10-20 min: 72:28-60:40,  $t_R$  = 12 min) yielded **56** as white fluffy solid (3.3 mg, 97%). <sup>1</sup>H-NMR (600 MHz, DMSO-*d*<sub>6</sub>): δ 0.73-0.86 (m, 9H), 0.88-0.93 (m, 3H), 0.96-1.03 (m, 1H), 1.21-1.30 (m, 6H), 1.36-1.85 (m, 20H), 1.85-1.95 (m, 1H), 2.47-2.48 (m, 3H), 3.05-3.30 (m, 20H), 3.47-3.48 (m, 3H), 3.63-3.82 (m, 12H), 4.10-4.14 (m, 1H), 4.21-4.26 (m, 1H), 4.38-4.45 (m, 1H), 4.54-4.66 (m, 2H), 6.58-6.66 (m, 2H), 6.66-7.10 (br s, 2H), 7.10-7.15 (m, 2H), 7.15-7.48 (br s, 2H, interfering with the next listed signal), 7.31-7.35 (m, 1H), 7.48-7.56 (m, 1H), 7.56-7.67 (m, 2H), 8.07-8.16 (m, 1H), 8.30-8.63 (m, 3H), 8.89-9.15 (m, 4H), 9.97-10.25 (m, 1H), 12.48 (br s, 1H), 13.29 (br s, 1H). HRMS:  $m/z$   $[M+2H]^{2+}$  calcd. for

$[\text{C}_{62}\text{H}_{105}\text{GaN}_{18}\text{O}_{16}]^{2+}$  713.3600, found 713.3605. RP-HPLC (220 nm): 98% ( $t_R$  = 7.4 min,  $k$  = 8.7).  $\text{C}_{62}\text{H}_{103}\text{GaN}_{18}\text{O}_{16} \cdot \text{C}_6\text{H}_3\text{F}_9\text{O}_6$  (1426.34 + 342.07).

***N*<sup>α</sup>-Methyl-*N*<sup>ω</sup>-{[4-(*N*-{2-[gallium(III)-4,7,10-tris(carboxymethyl)-1,4,7,10-tetraazacyclododecan-1-yl]acetyl})aminobutyl]aminocarbonyl}Arg-Arg-Pro-β,β-dimethyl-Tyr-α-*tert*-butyl-Gly-Leu tris(hydrotrifluoroacetate) (57).**

Compound **57** was prepared from **55** (1.8 mg, 0.991 μmol) according to the general procedure for the insertion of  $\text{Ga}^{3+}$ . Purification by preparative RP-HPLC (column: Gemini-NX C18, gradient: 0-5 min: A1/B1 90:10-80:20, 5-10 min: 80:20-72:28, 10-20 min: 72:28-60:40,  $t_R$  = 12 min) yielded **57** as white fluffy solid (1.6 mg, 91%).  $^1\text{H}$ -NMR (600 MHz,  $\text{DMSO}-d_6$ ):  $\delta$  0.77-0.98 (m, 15H), 1.19-1.29 (m, 6H), 1.37-1.83 (m, 18H), 1.87-1.95 (m, 1H), 2.46-2.48 (m, 3H), 3.02-3.17 (m, 9H), 3.25-3.32 (m, 11H), 3.63-3.70 (m, 7H), 3.70-3.85 (m, 8H), 4.20-4.27 (m, 2H), 4.40-4.46 (m, 1H), 4.53-4.60 (m, 1H), 4.67-4.74 (m, 1H), 6.58-6.63 (m, 2H), 6.63-7.10 (br s, 2H), 7.10-7.60 (br s, 2H, interfering with the next three listed signals), 7.12-7.15 (m, 2H), 7.37-7.45 (m, 2H), 7.49-7.54 (m, 1H), 7.60-7.65 (m, 1H), 8.15 (d, 1H,  $J$  7.8 Hz), 8.25-8.61 (m, 3H), 8.86-9.17 (m, 4H), 10.03-10.28 (m, 1H), 12.46 (br s, 1H), 13.30 (br s, 1H). HRMS:  $m/z$   $[M+2H]^{2+}$  calcd. for  $[\text{C}_{62}\text{H}_{105}\text{GaN}_{18}\text{O}_{16}]^{2+}$  713.3600, found 713.3606. RP-HPLC (220 nm): 98% ( $t_R$  = 7.5 min,  $k$  = 8.9).  $\text{C}_{62}\text{H}_{103}\text{GaN}_{18}\text{O}_{16} \cdot \text{C}_6\text{H}_3\text{F}_9\text{O}_6$  (1426.34 + 342.07).

### 3. RP-HPLC chromatograms of compounds 8, 9, 11, 12, 14-23, 25, 26, 28, 29 and 31-57.

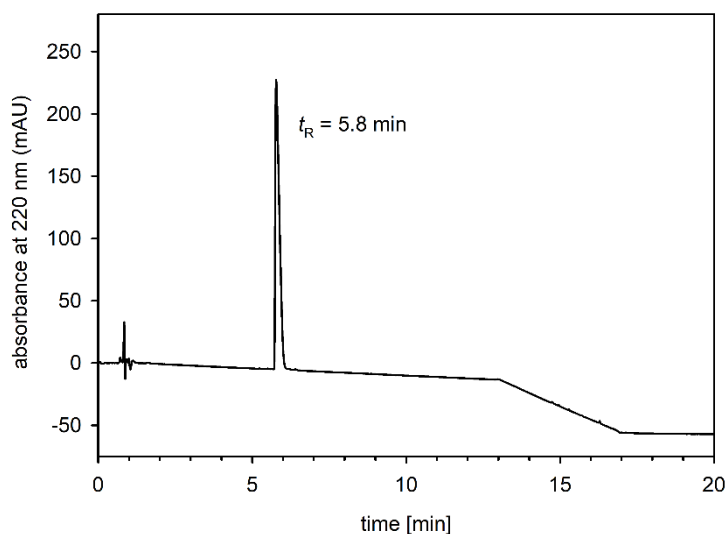

RP-HPLC analysis (purity control) of compound **8**

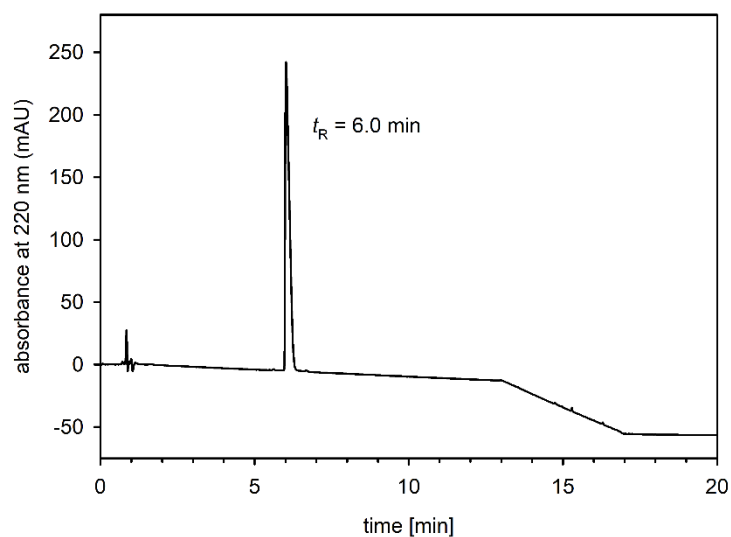

RP-HPLC analysis (purity control) of compound **9**

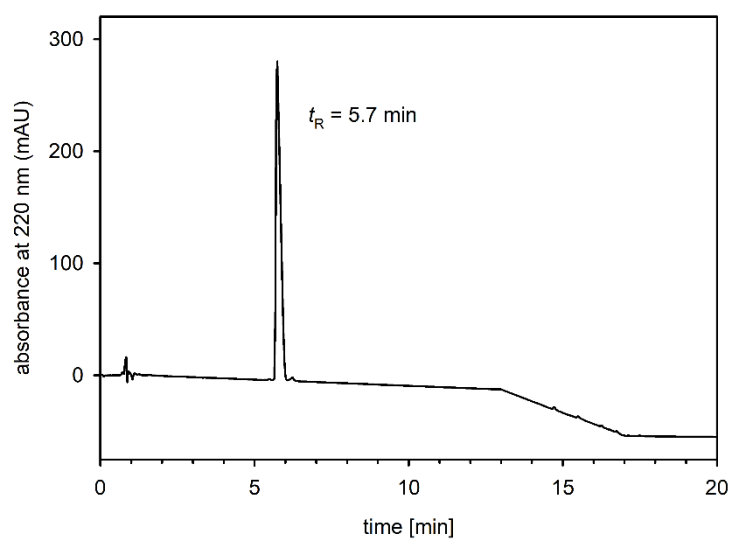

RP-HPLC analysis (purity control) of compound **11**

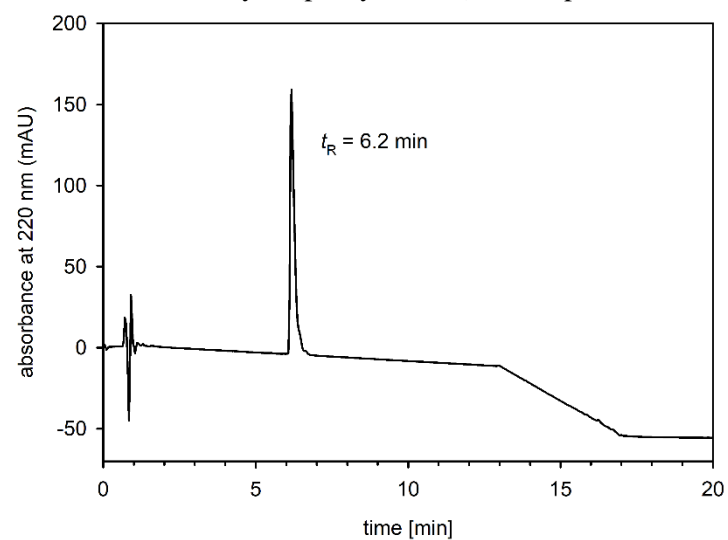

RP-HPLC analysis (purity control) of compound **12**

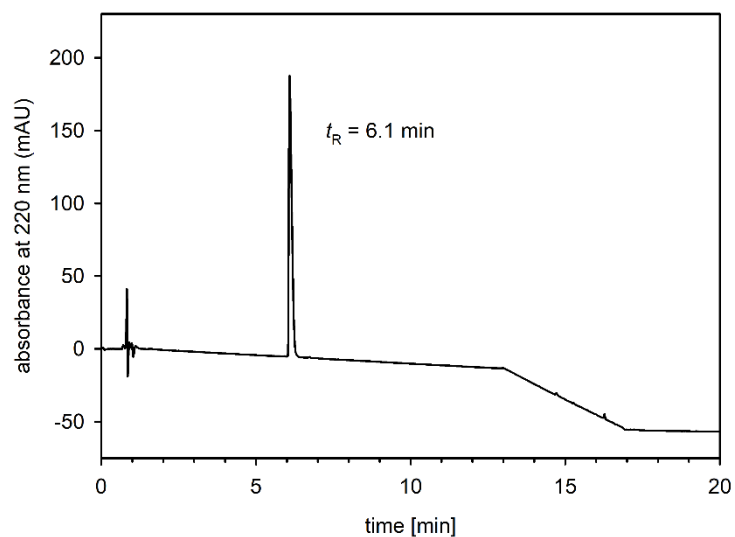

RP-HPLC analysis (purity control) of compound **14**

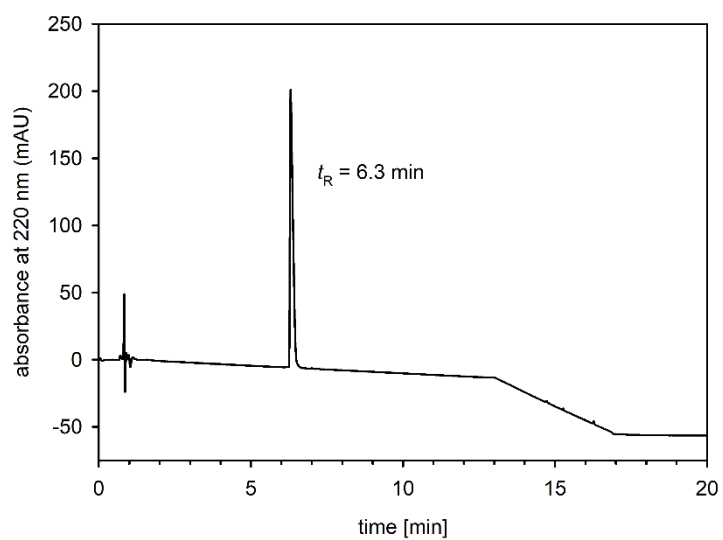

RP-HPLC analysis (purity control) of compound **15**

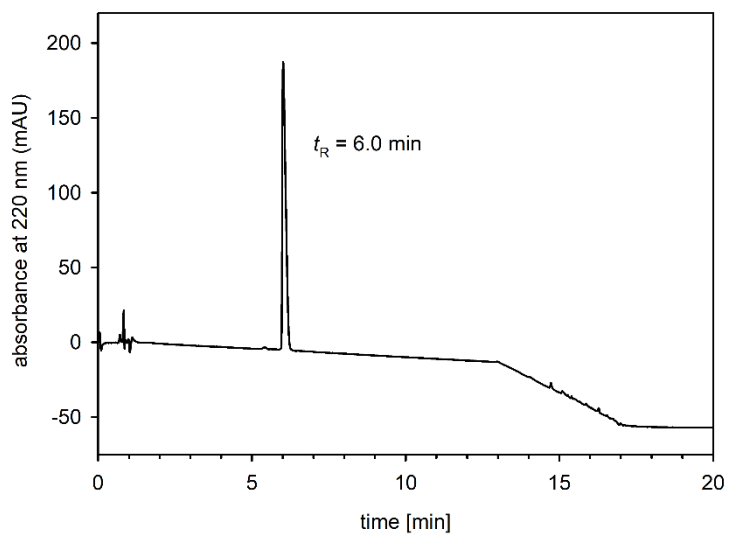

RP-HPLC analysis (purity control) of compound **16**

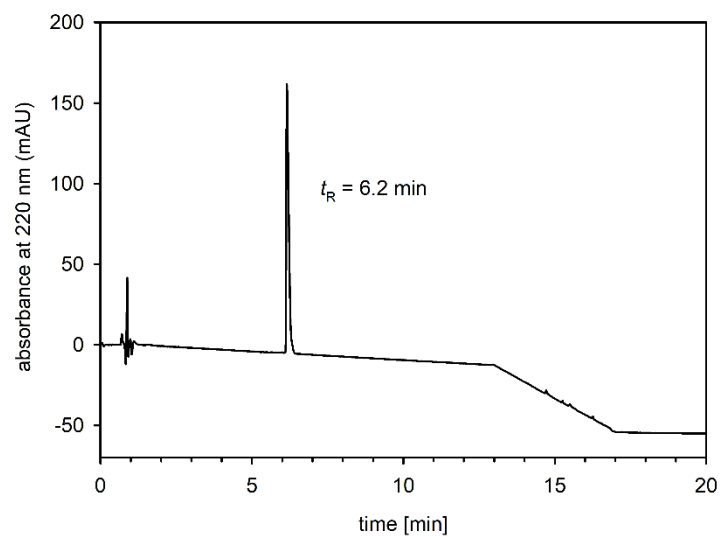

RP-HPLC analysis (purity control) of compound **17**

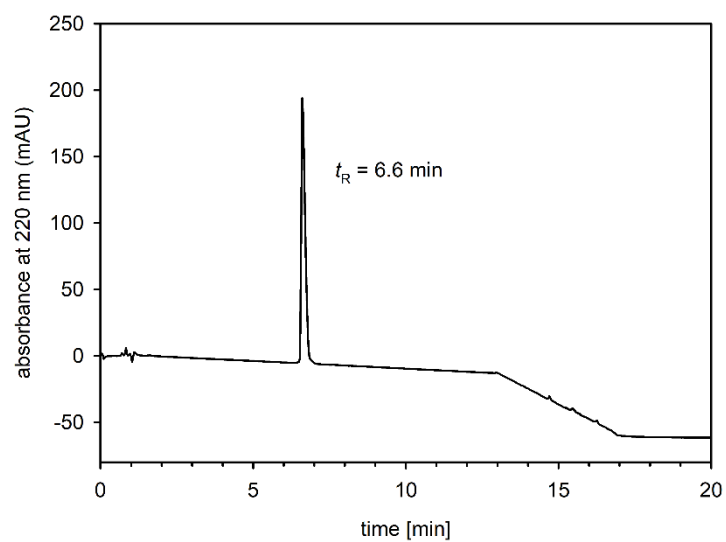

RP-HPLC analysis (purity control) of compound **18**

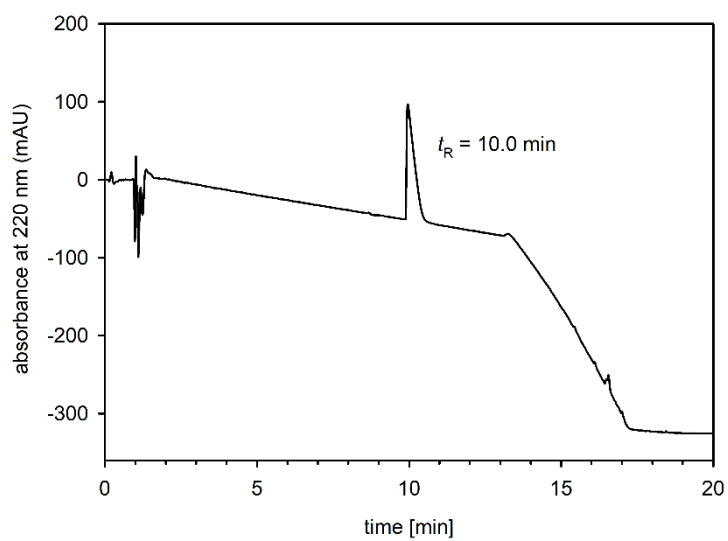

RP-HPLC analysis (purity control) of compound **19**



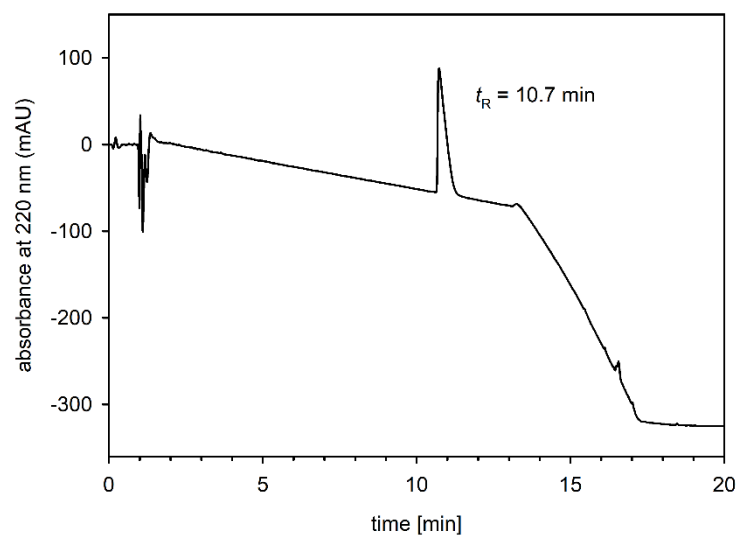

RP-HPLC analysis (purity control) of compound **20**

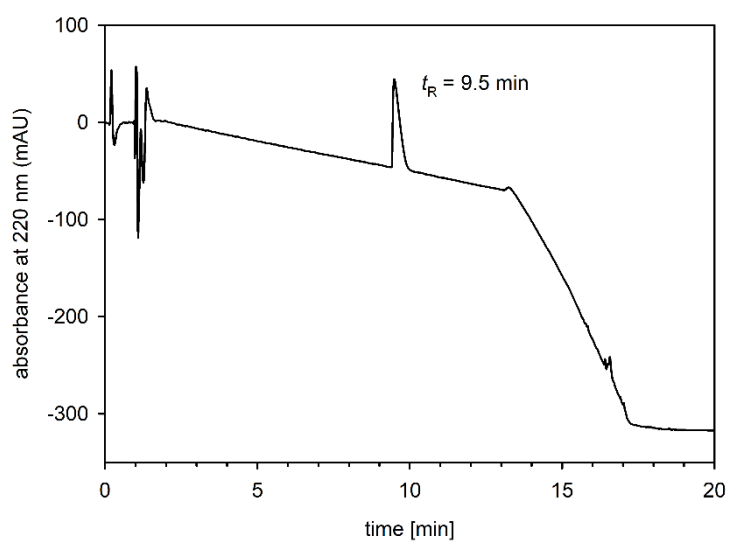

RP-HPLC analysis (purity control) of compound **21**

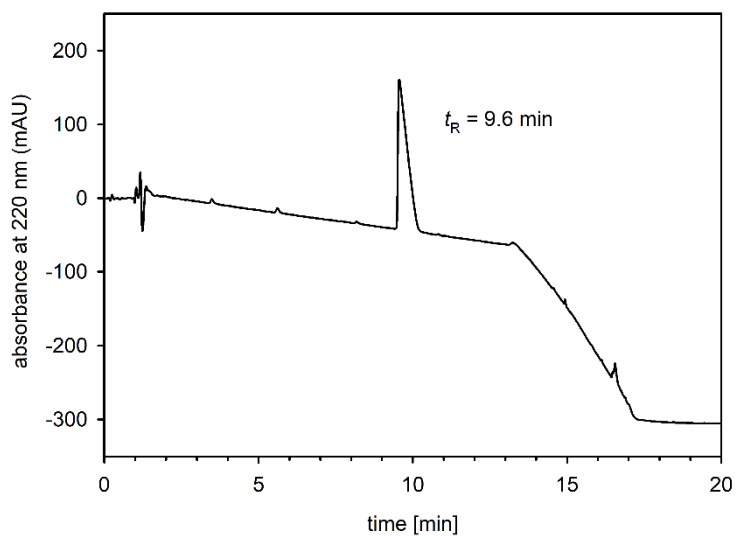

RP-HPLC analysis (purity control) of compound **22**

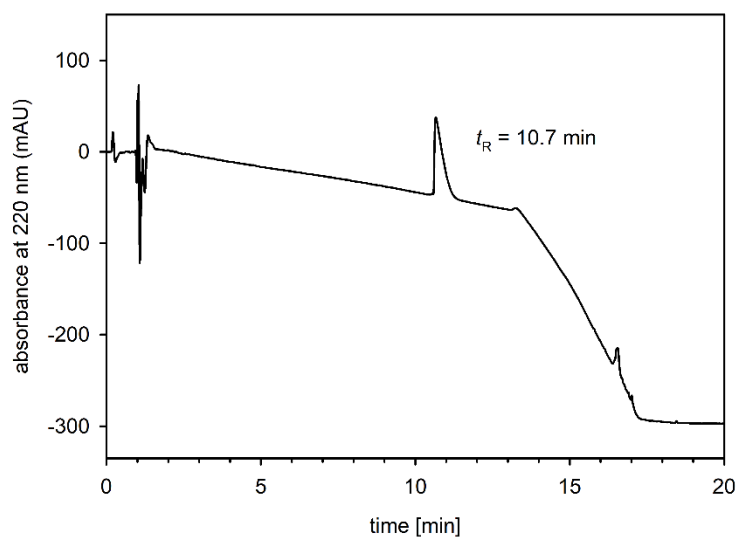

RP-HPLC analysis (purity control) of compound **23**

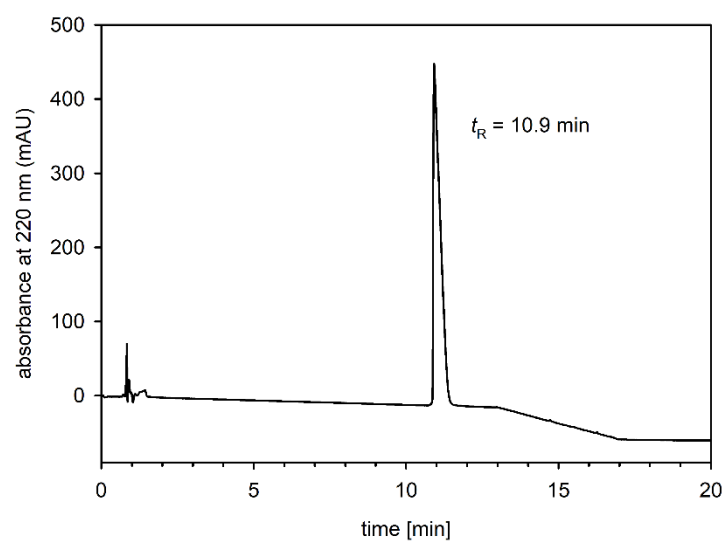

RP-HPLC analysis (purity control) of compound **25**

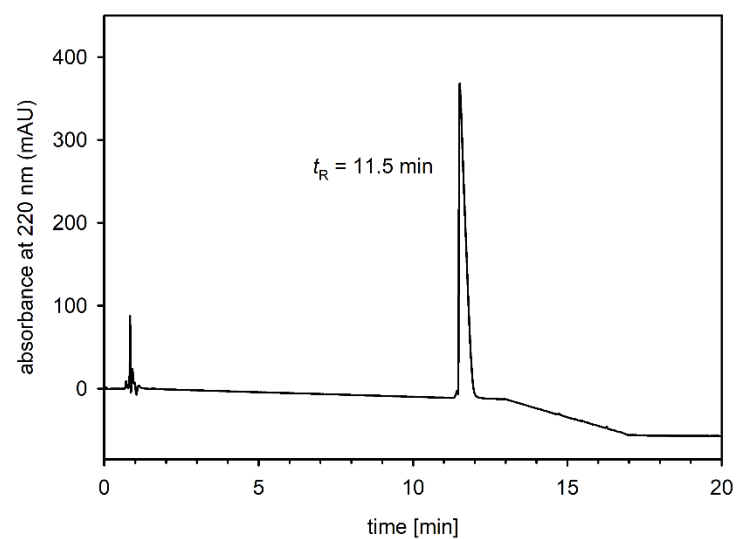

RP-HPLC analysis (purity control) of compound **26**

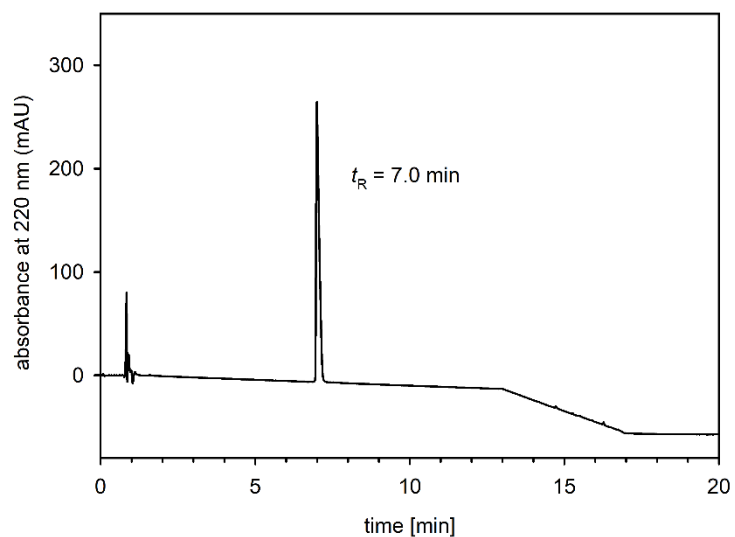

RP-HPLC analysis (purity control) of compound **28**

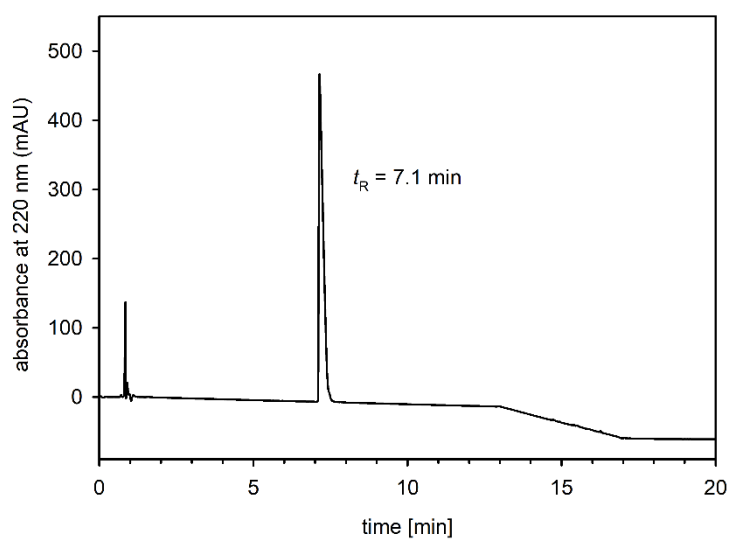

RP-HPLC analysis (purity control) of compound **29**

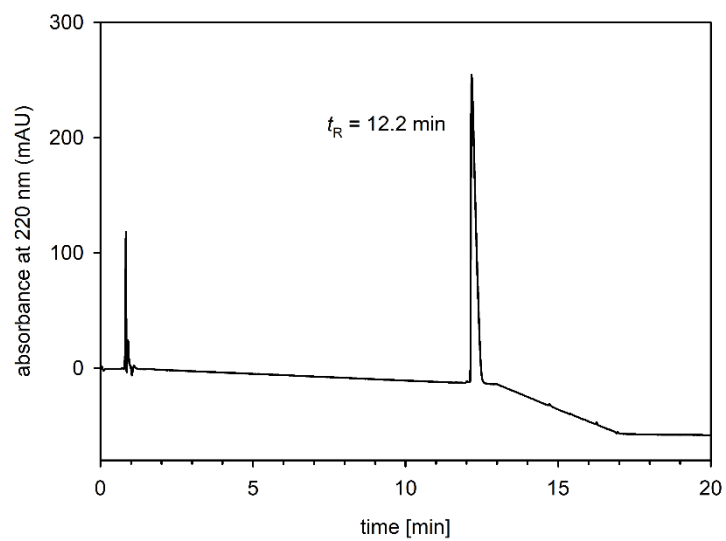

RP-HPLC analysis (purity control) of compound **31**

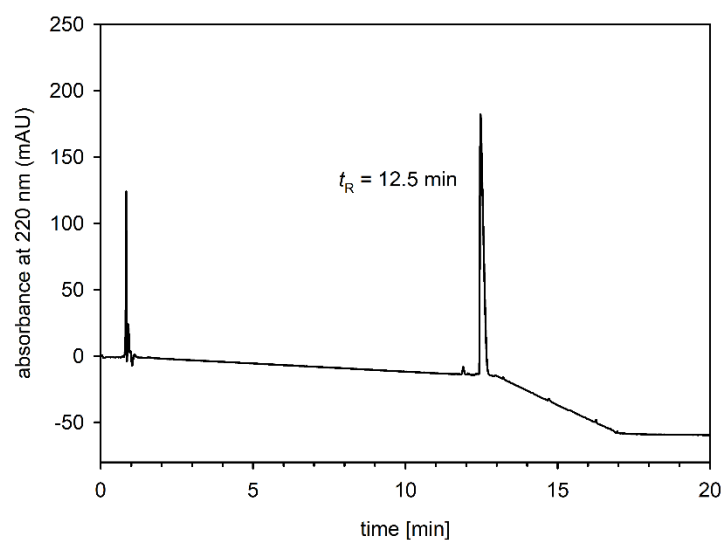

RP-HPLC analysis (purity control) of compound **32**

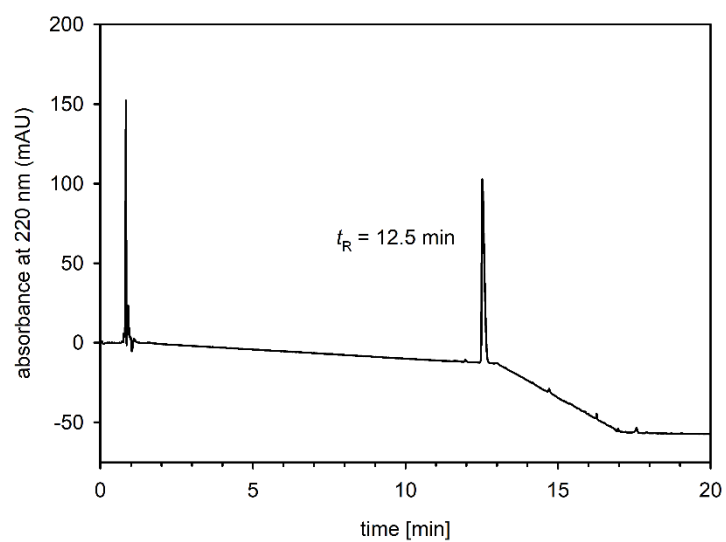

RP-HPLC analysis (purity control) of compound **33**

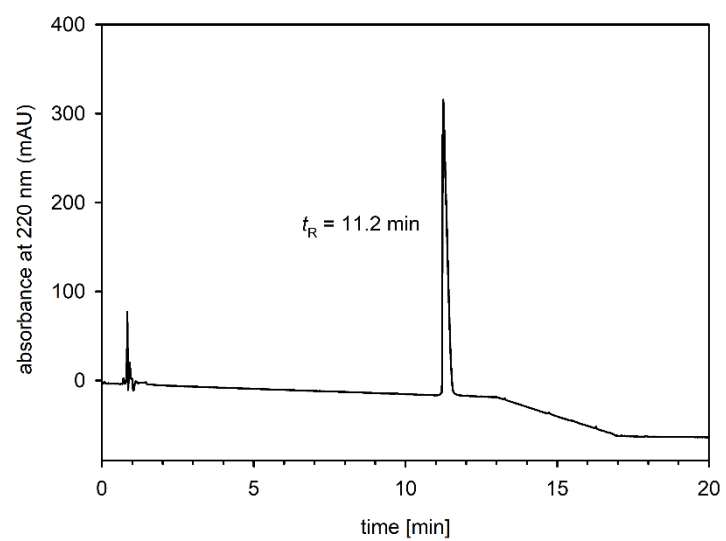

RP-HPLC analysis (purity control) of compound **34**

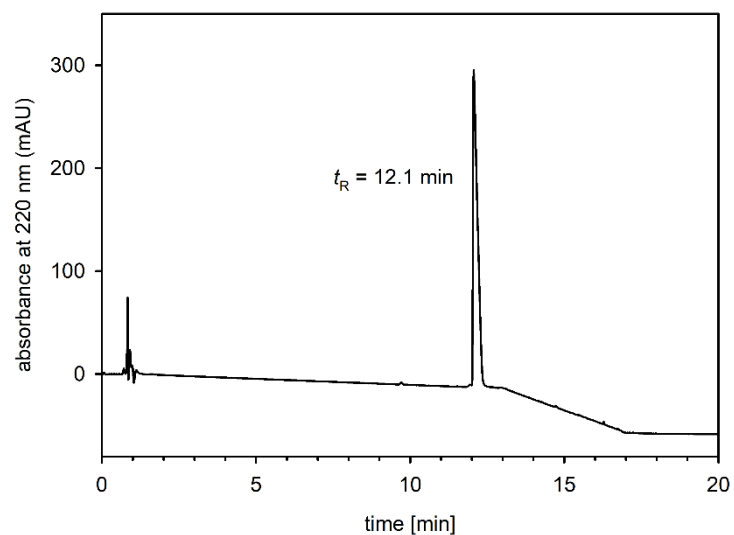

RP-HPLC analysis (purity control) of compound **35**

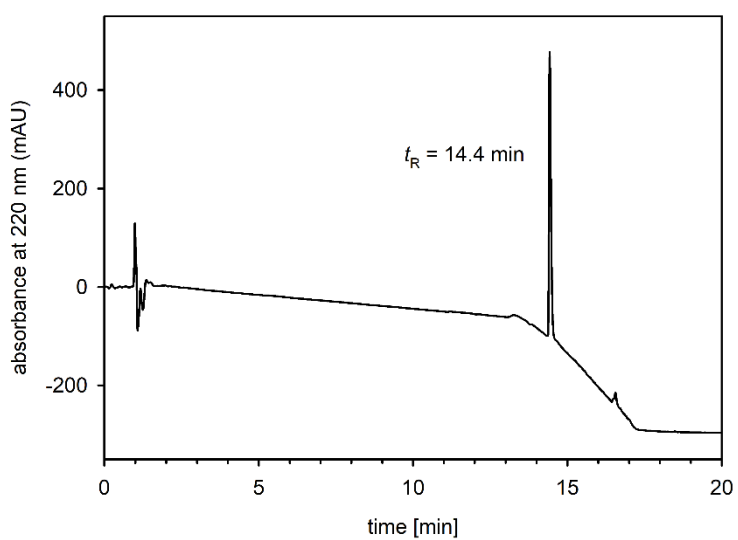

RP-HPLC analysis (purity control) of compound **36**

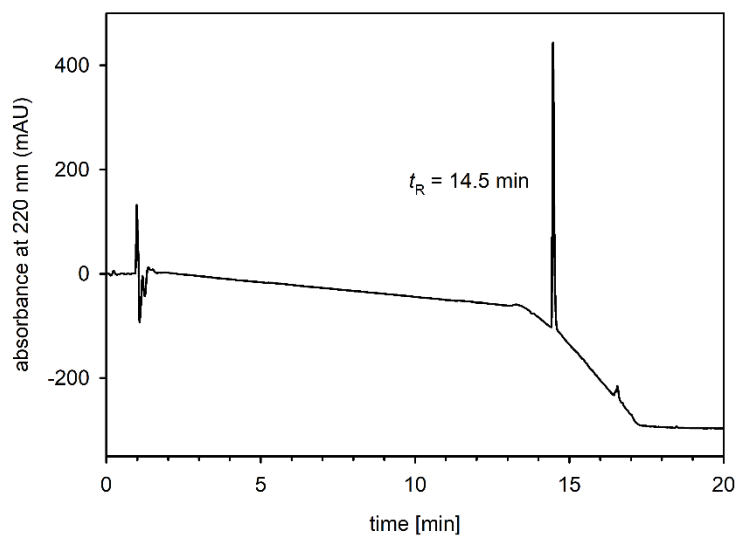

RP-HPLC analysis (purity control) of compound **37**

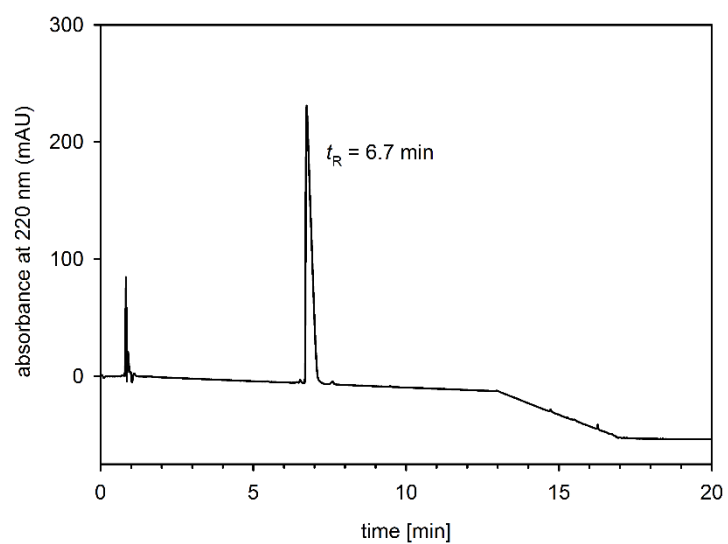

RP-HPLC analysis (purity control) of compound **38**

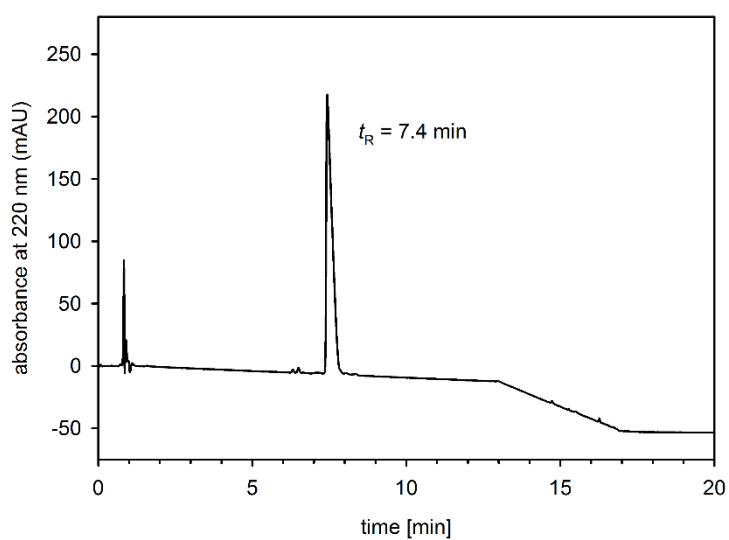

RP-HPLC analysis (purity control) of compound **39**

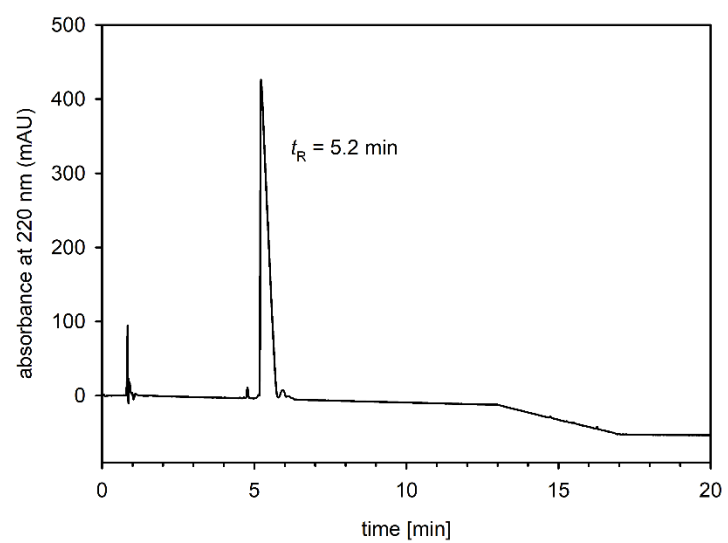

RP-HPLC analysis (purity control) of compound **40**

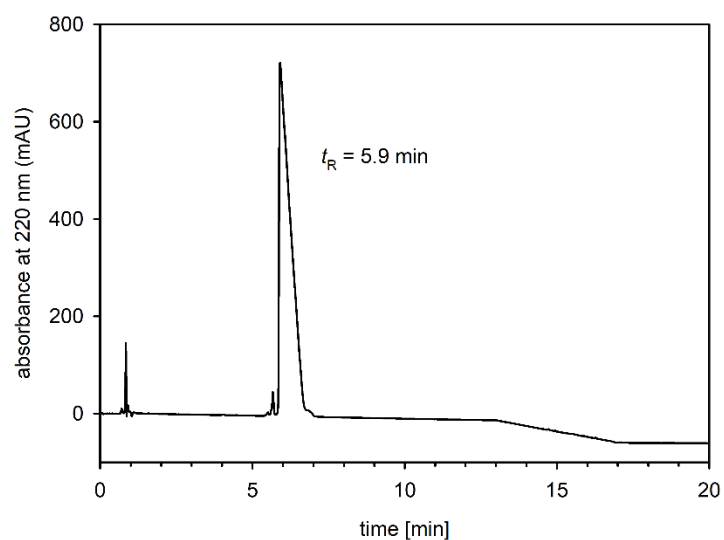

RP-HPLC analysis (purity control) of compound **41**

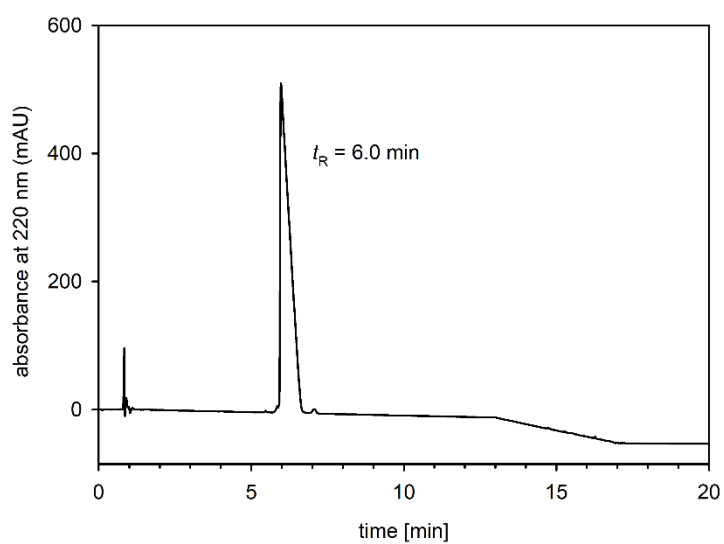

RP-HPLC analysis (purity control) of compound **42**

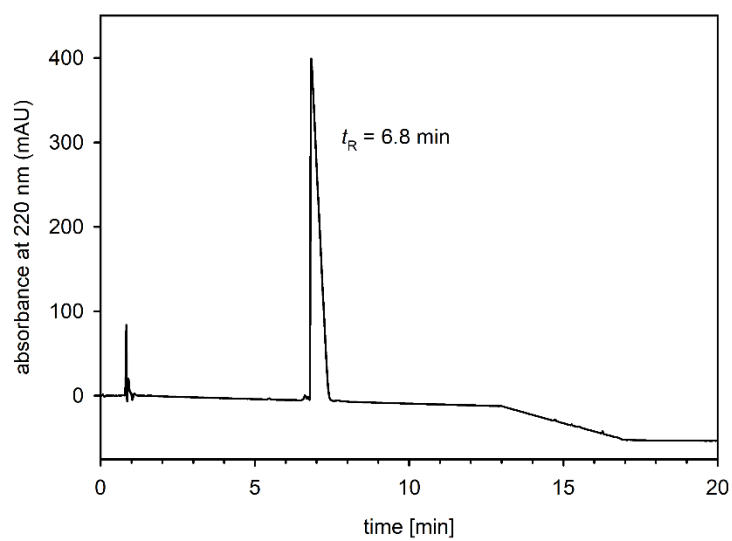

RP-HPLC analysis (purity control) of compound **43**

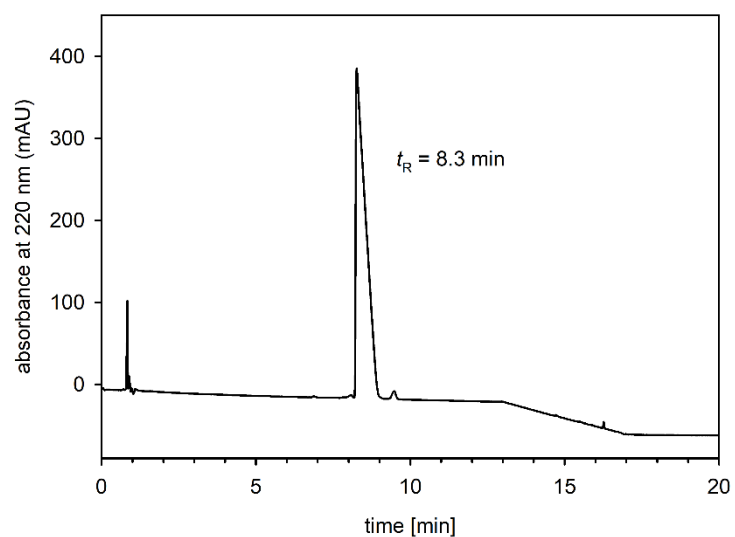

RP-HPLC analysis (purity control) of compound **44**

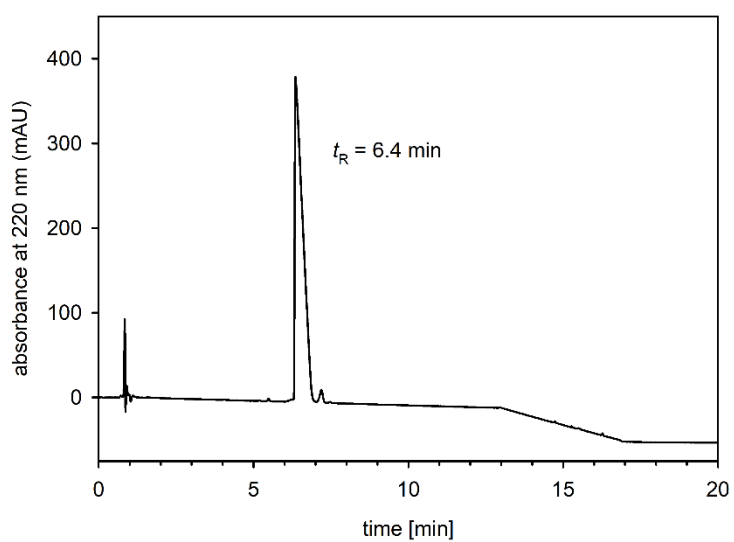

RP-HPLC analysis (purity control) of compound **45**

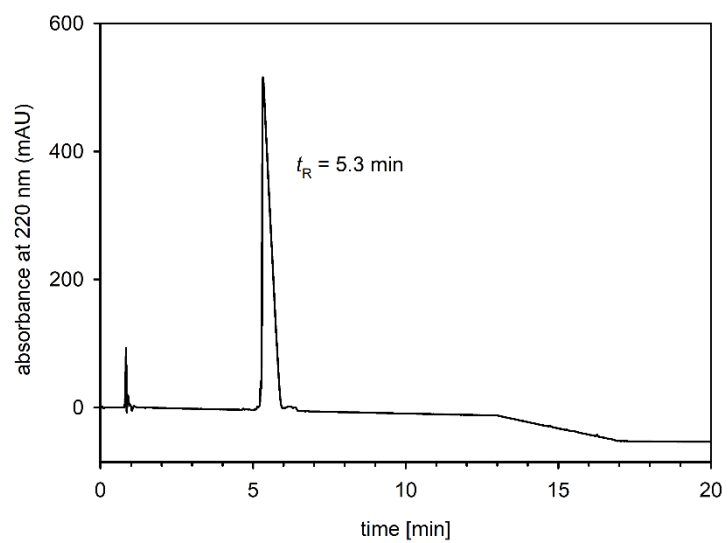

RP-HPLC analysis (purity control) of compound **46**



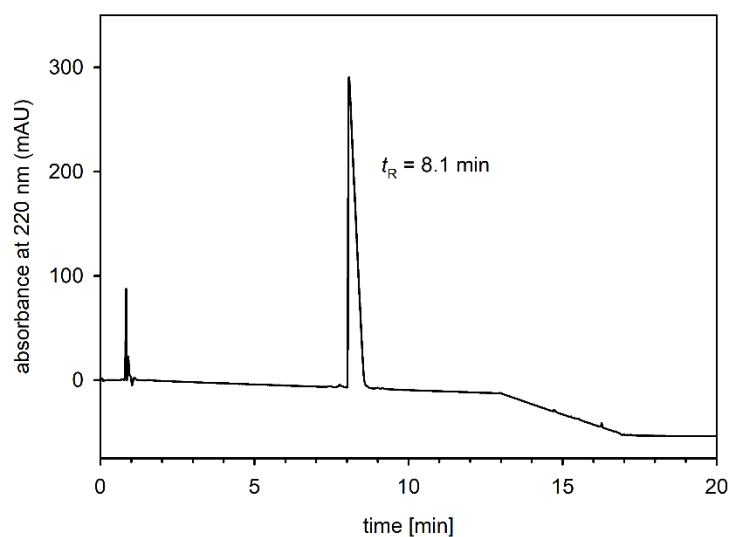

RP-HPLC analysis (purity control) of compound **47**

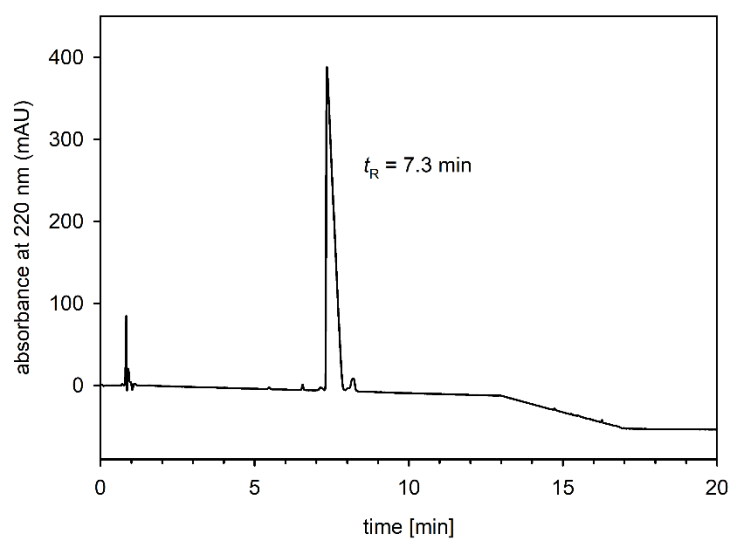

RP-HPLC analysis (purity control) of compound **48**

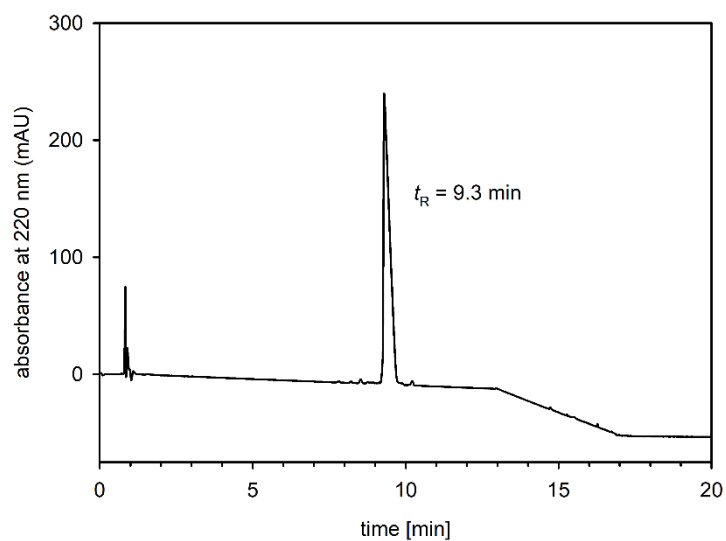

RP-HPLC analysis (purity control) of compound **49**

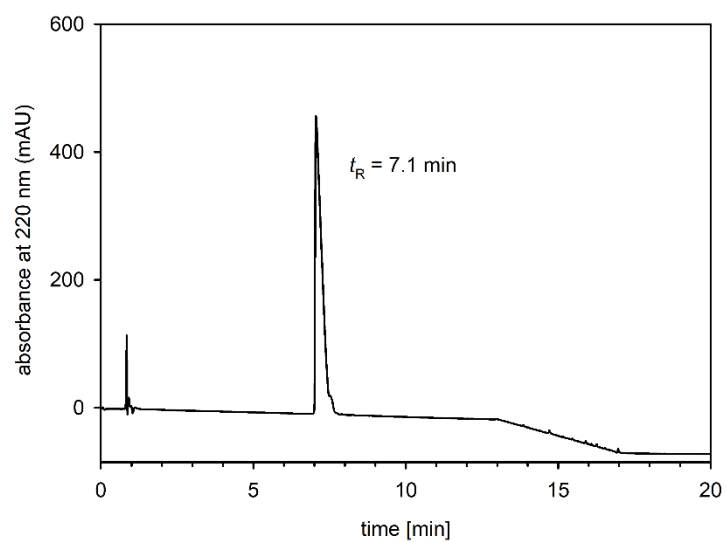

RP-HPLC analysis (purity control) of compound **50**

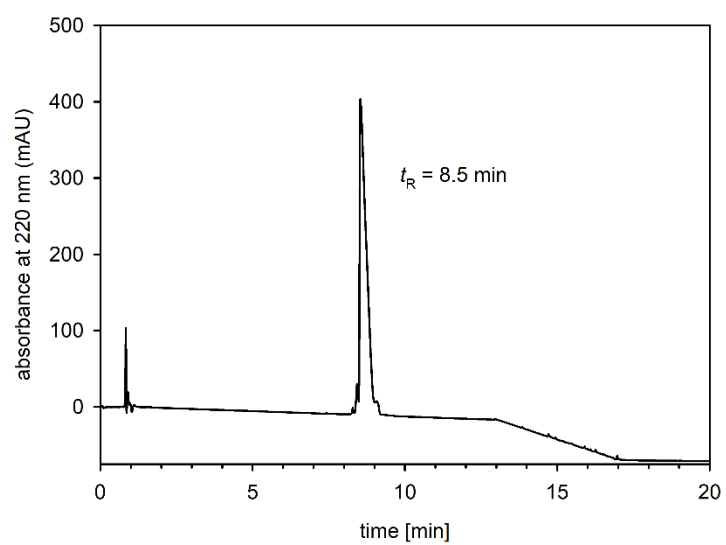

RP-HPLC analysis (purity control) of compound **51**

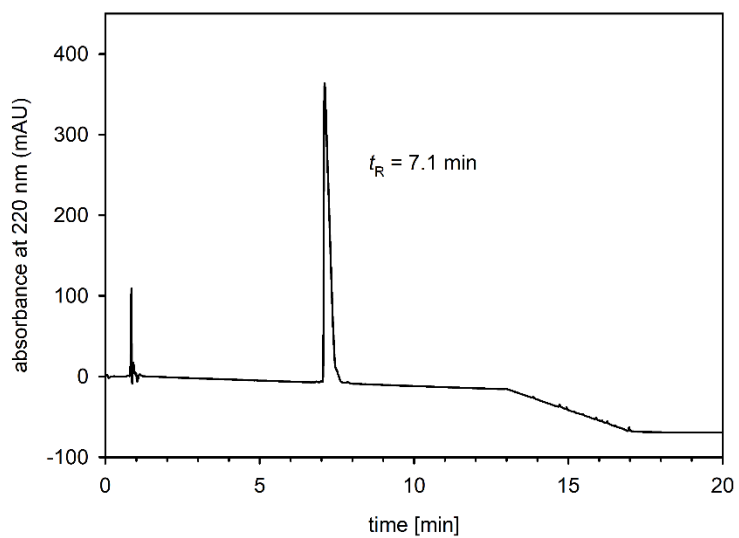

RP-HPLC analysis (purity control) of compound **52**

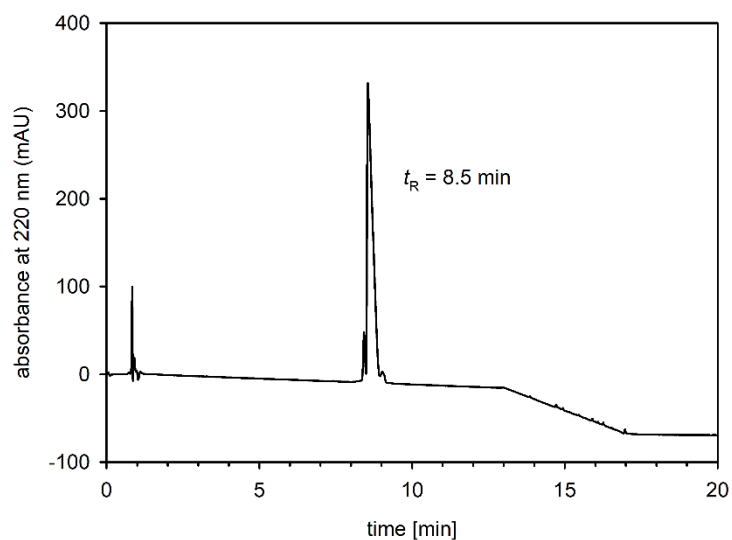

RP-HPLC analysis (purity control) of compound **53**

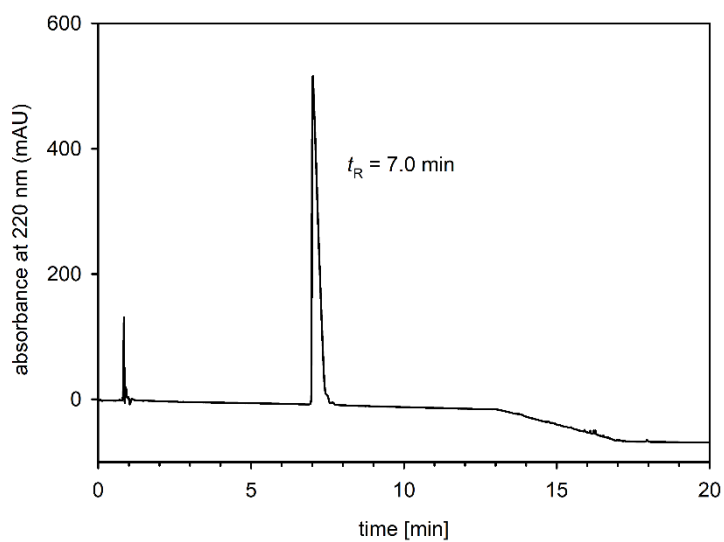

RP-HPLC analysis (purity control) of compound **54**

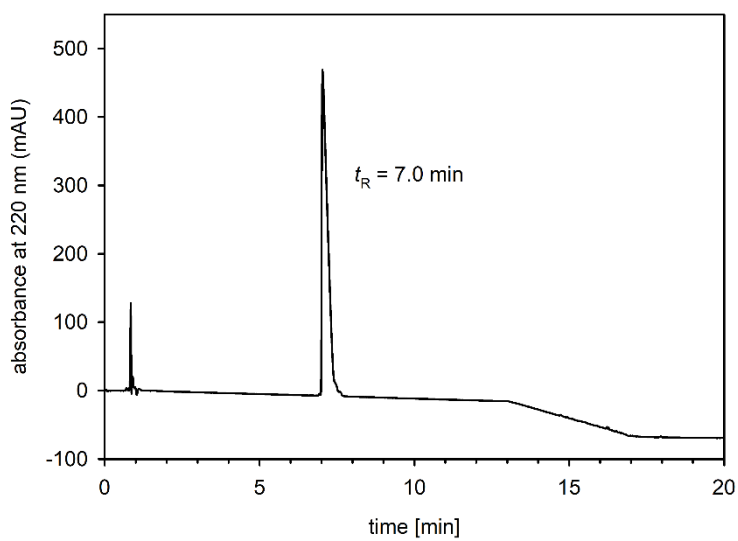

RP-HPLC analysis (purity control) of compound **55**

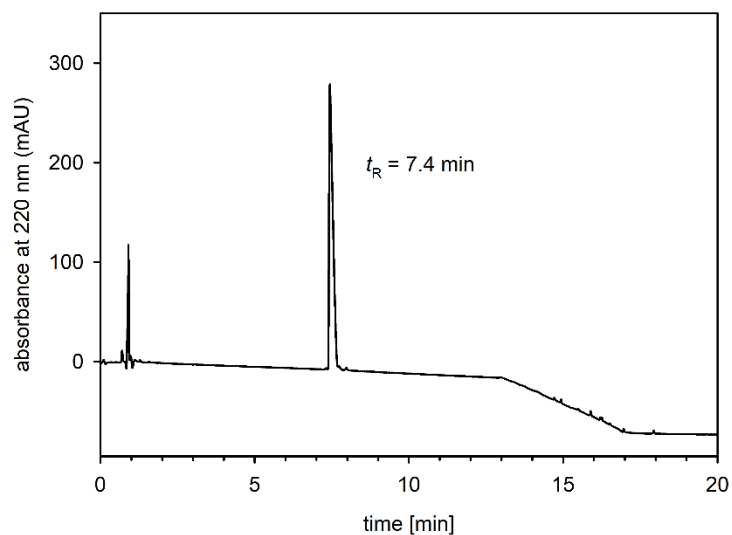

RP-HPLC analysis (purity control) of compound **56**

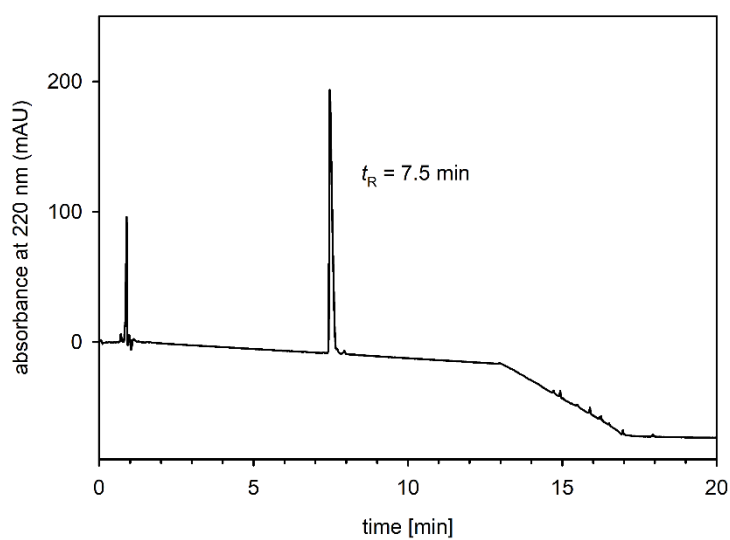

RP-HPLC analysis (purity control) of compound **57**

**4.  $^1\text{H}$ -NMR spectra of compounds 8, 9, 11, 12, 14-23, 25, 26, 28, 29 and 32-57, and  $^{13}\text{C}$ -NMR spectra of compounds 50 and 51.**

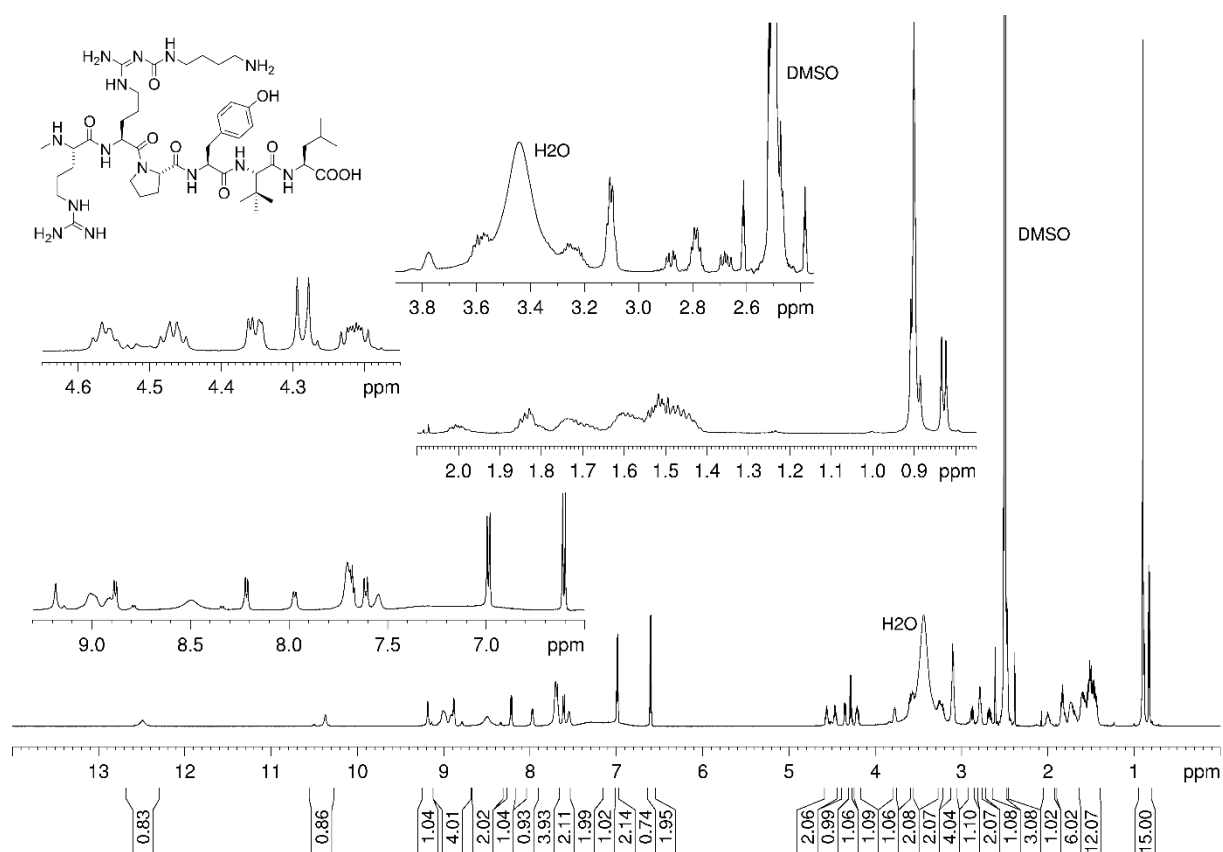

<sup>1</sup>H-NMR spectrum (600 MHz, DMSO-*d*<sub>6</sub>) of compound **8**

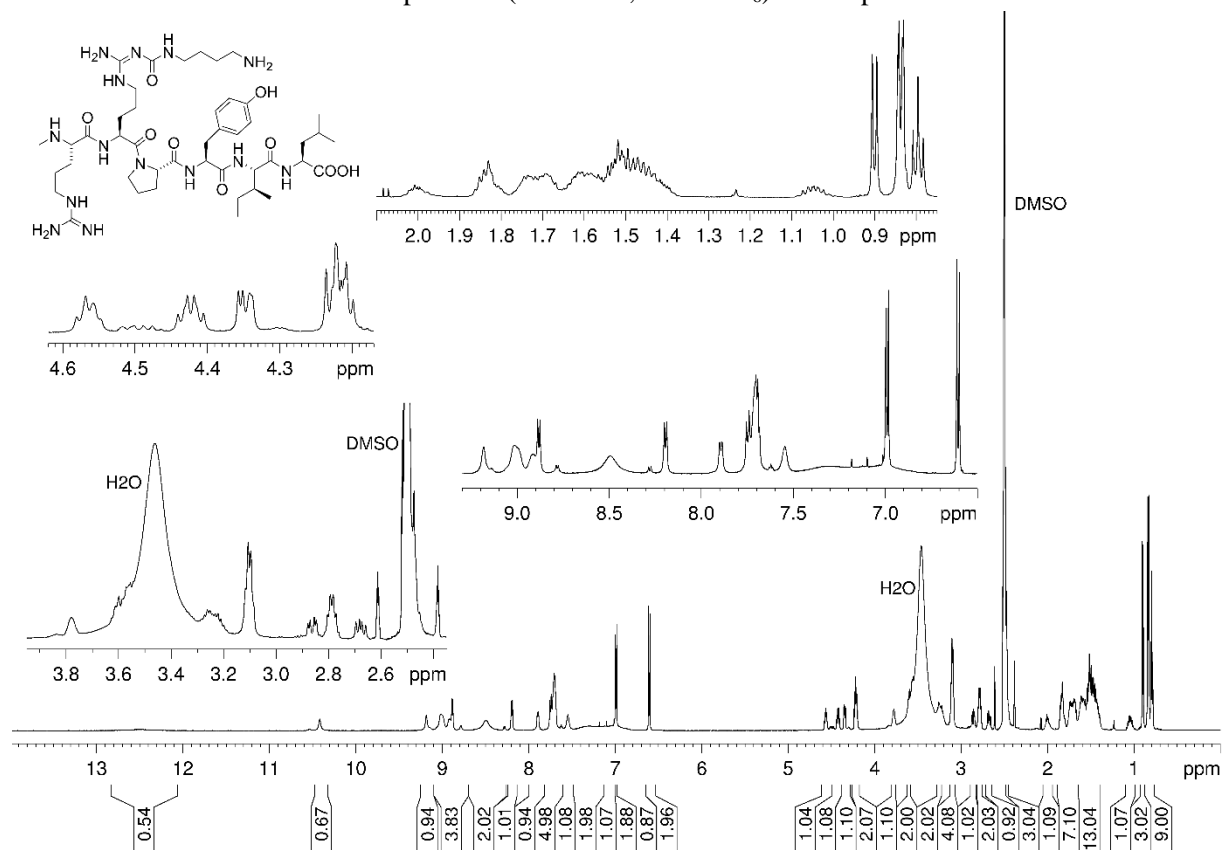

<sup>1</sup>H-NMR spectrum (600 MHz, DMSO-*d*<sub>6</sub>) of compound **9**

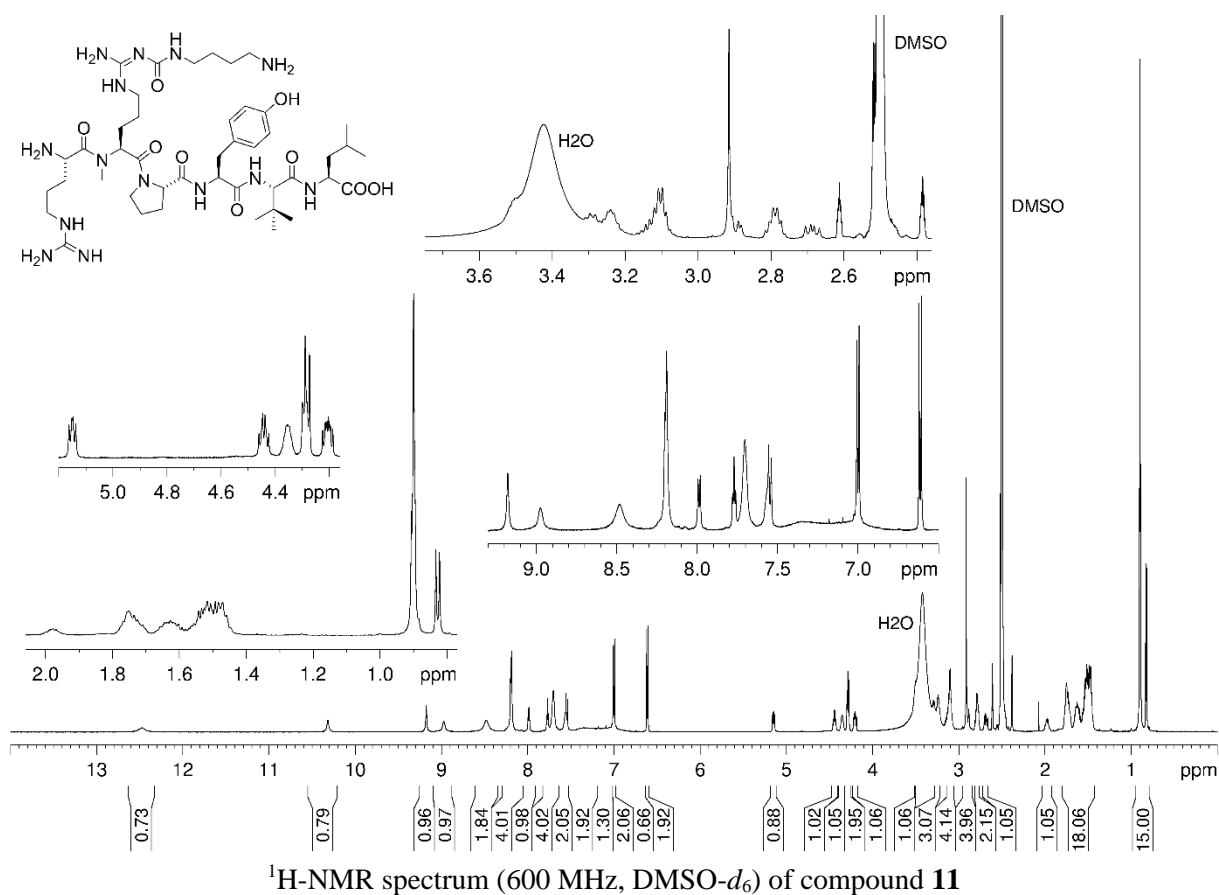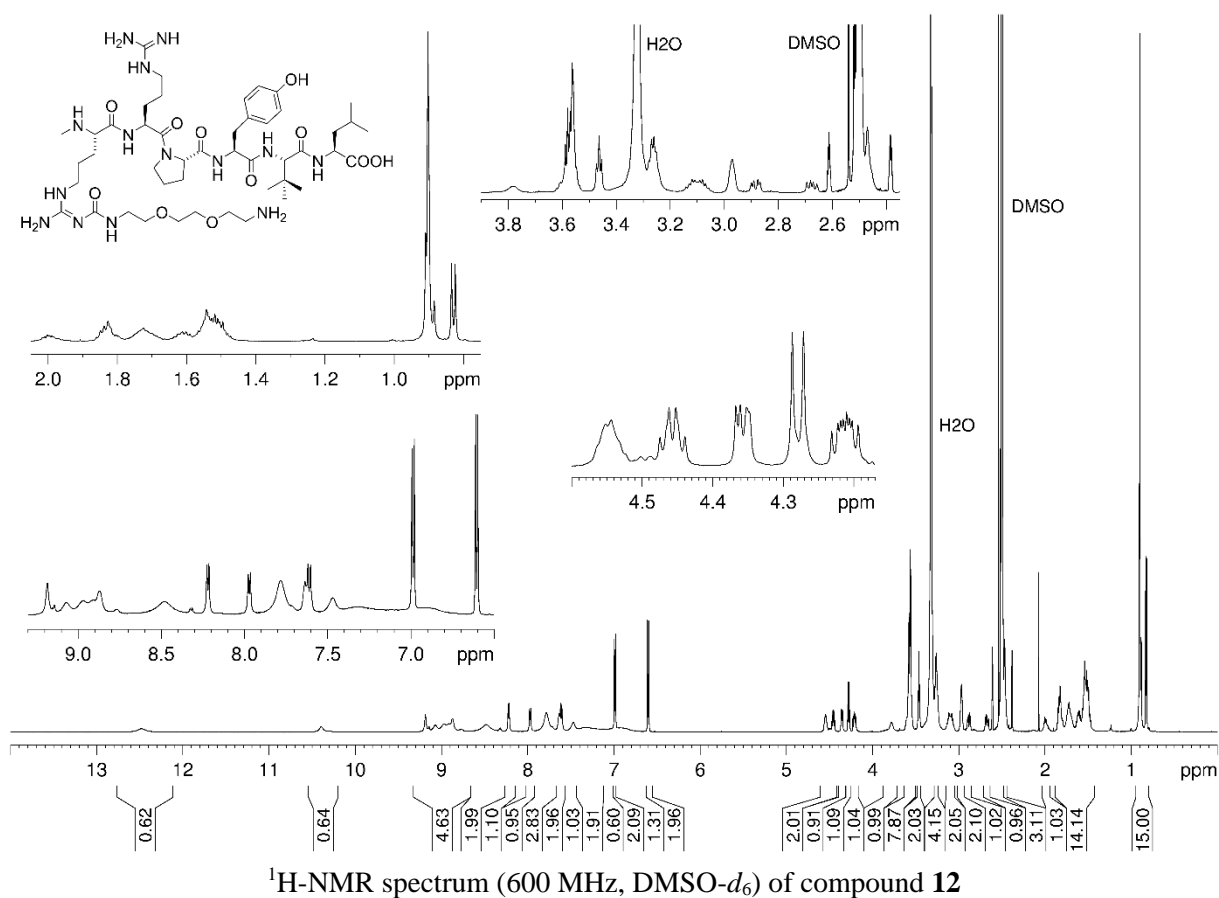

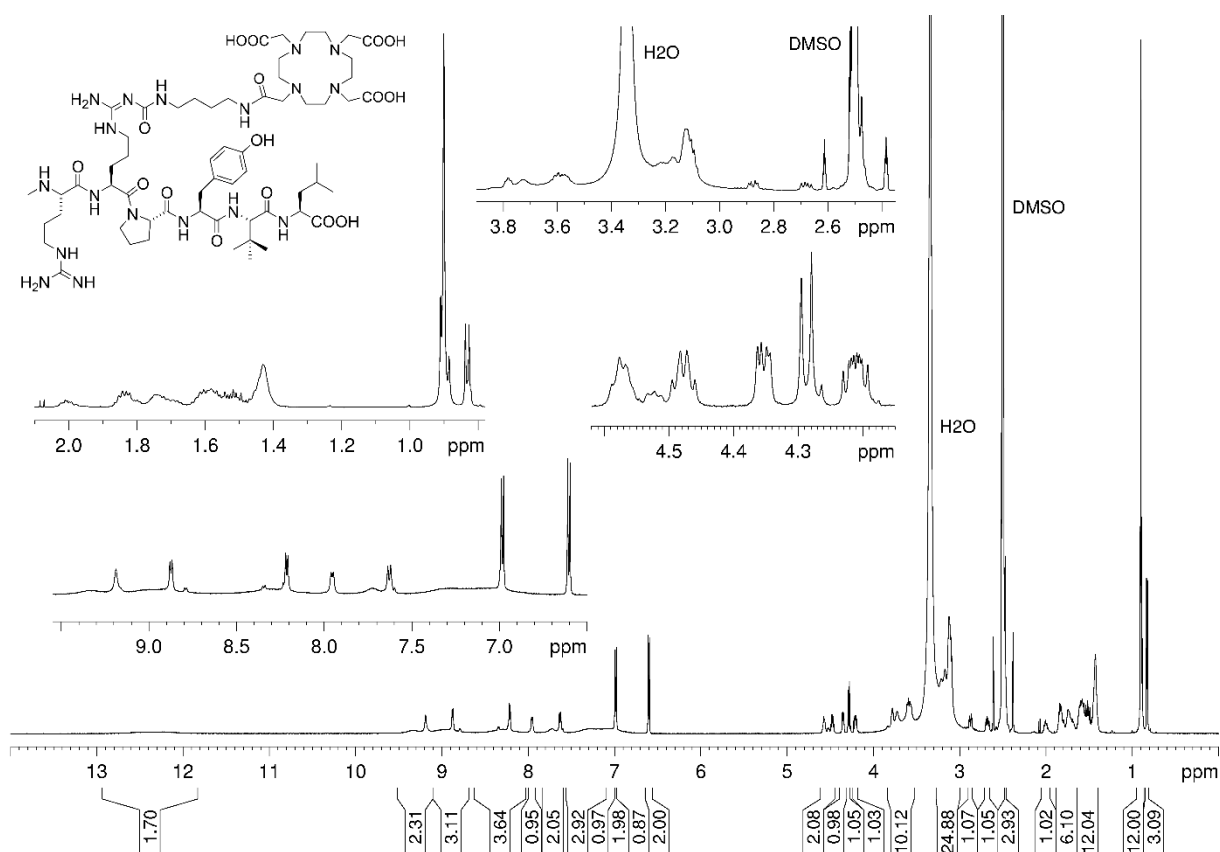

<sup>1</sup>H-NMR spectrum (600 MHz, DMSO-*d*<sub>6</sub>) of compound **14**

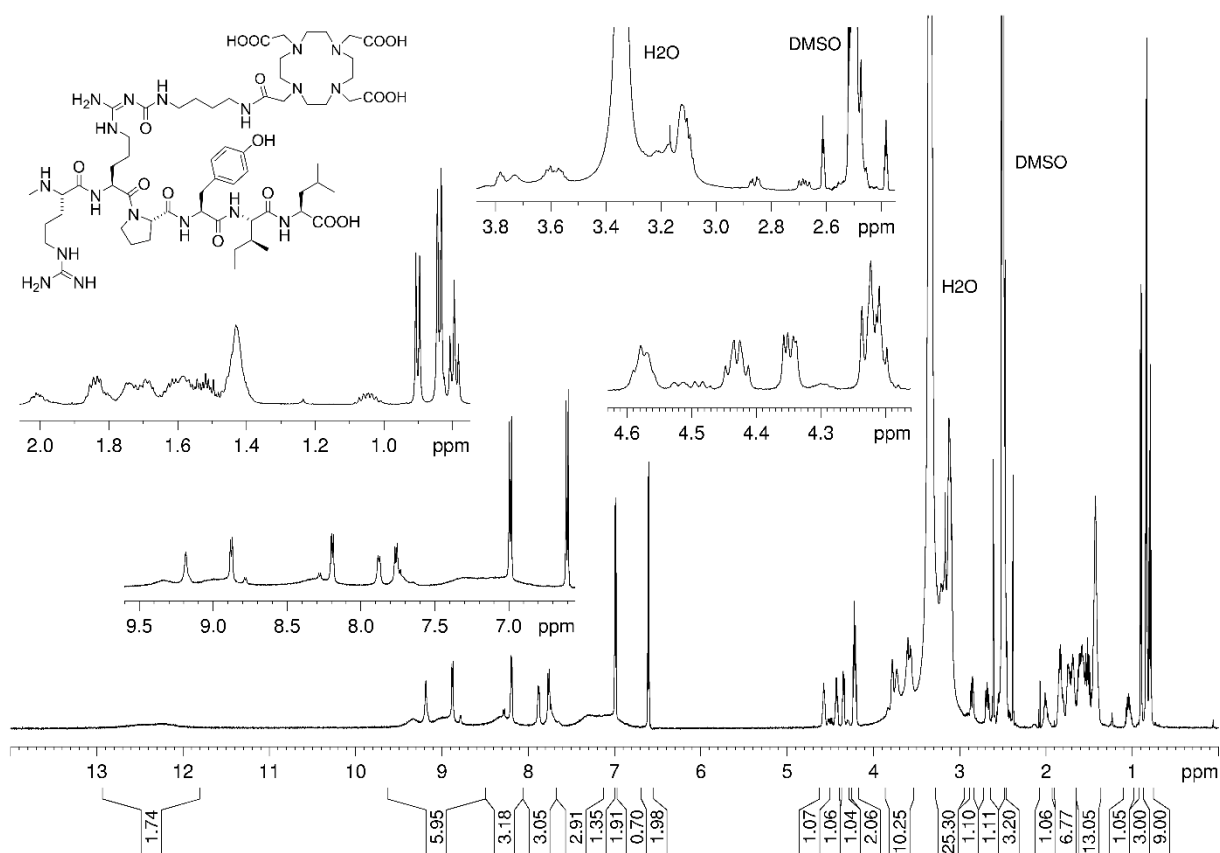

<sup>1</sup>H-NMR spectrum (600 MHz, DMSO-*d*<sub>6</sub>) of compound **15**

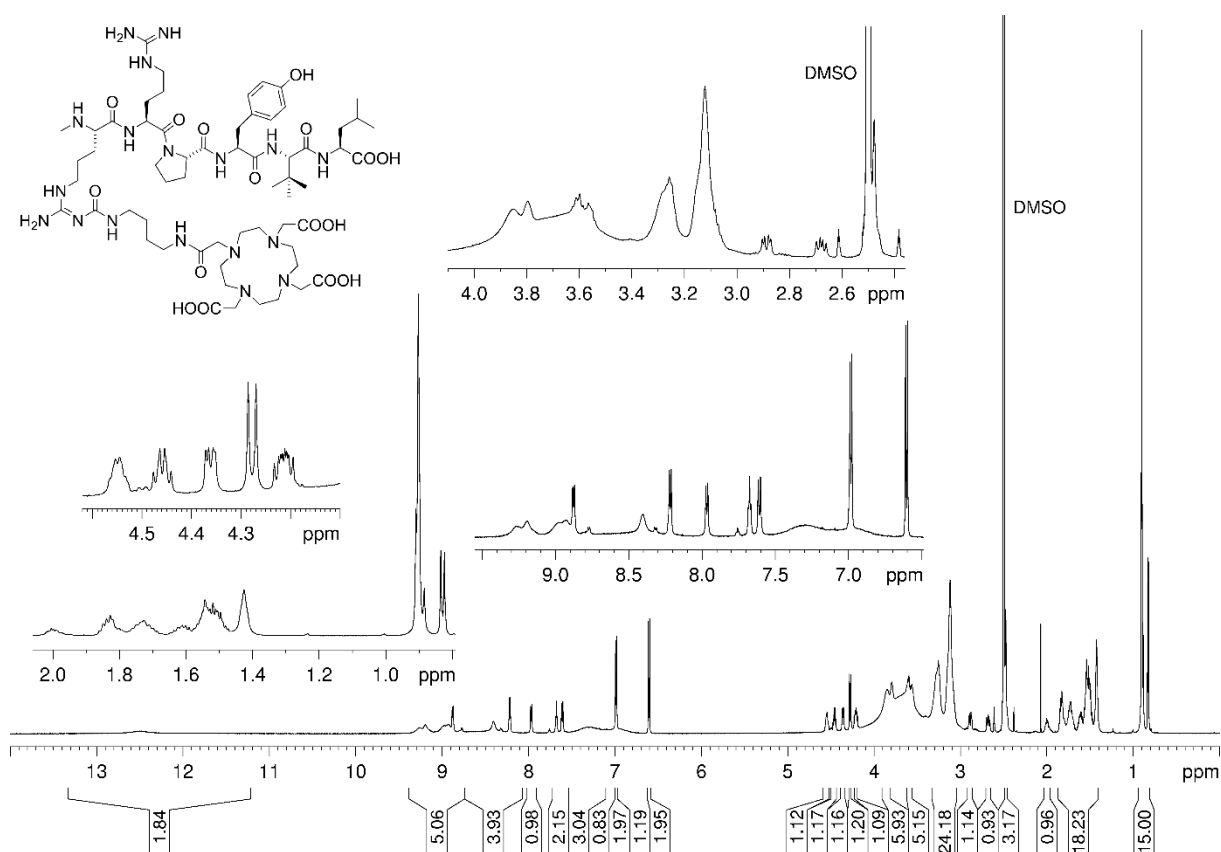

<sup>1</sup>H-NMR spectrum (600 MHz, DMSO-*d*<sub>6</sub>) of compound **16**

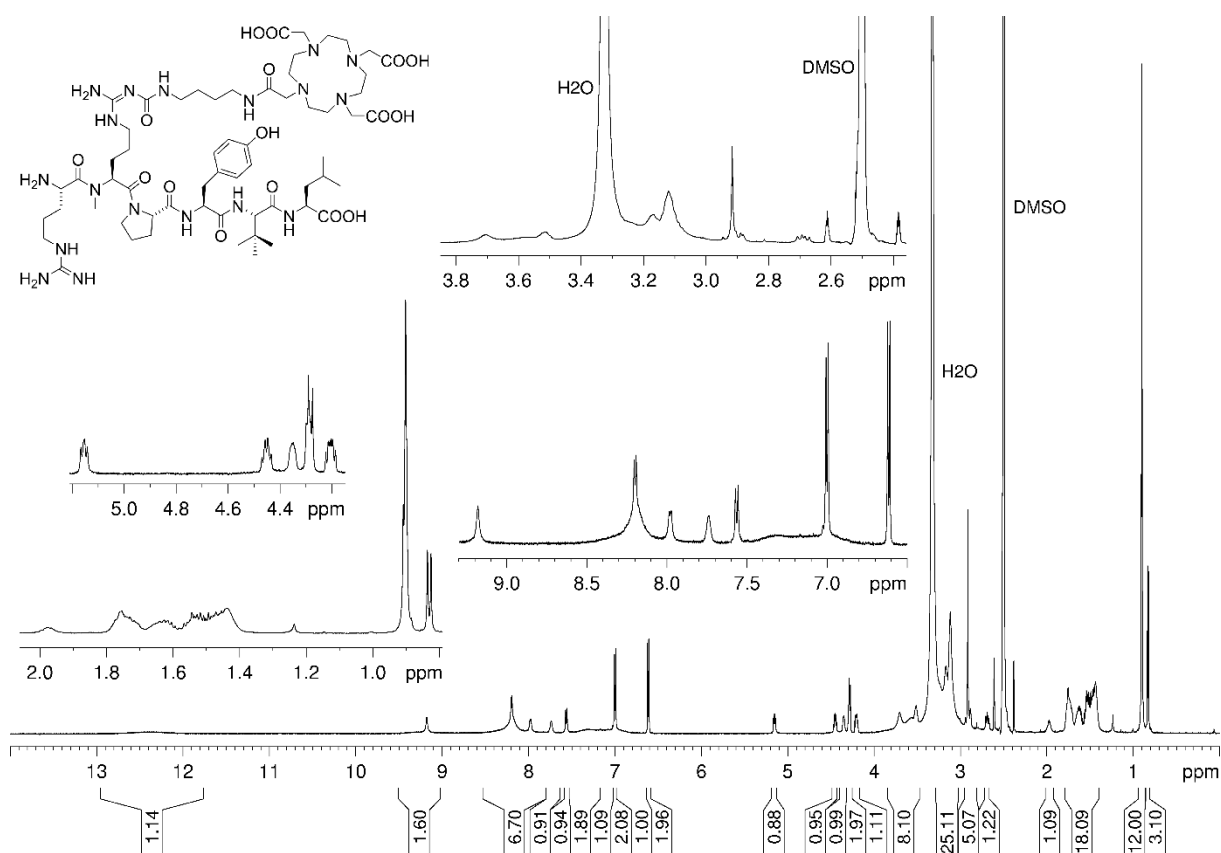

<sup>1</sup>H-NMR spectrum (600 MHz, DMSO-*d*<sub>6</sub>) of compound **17**



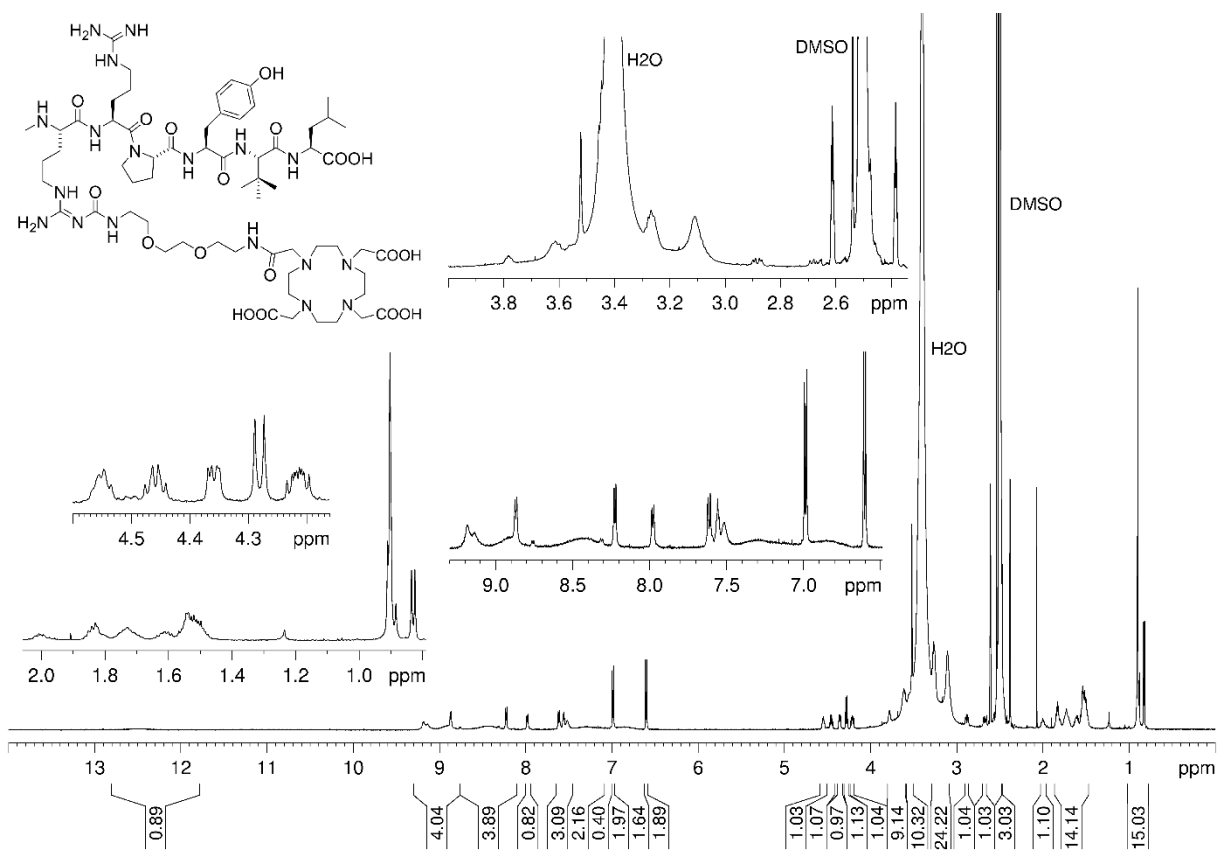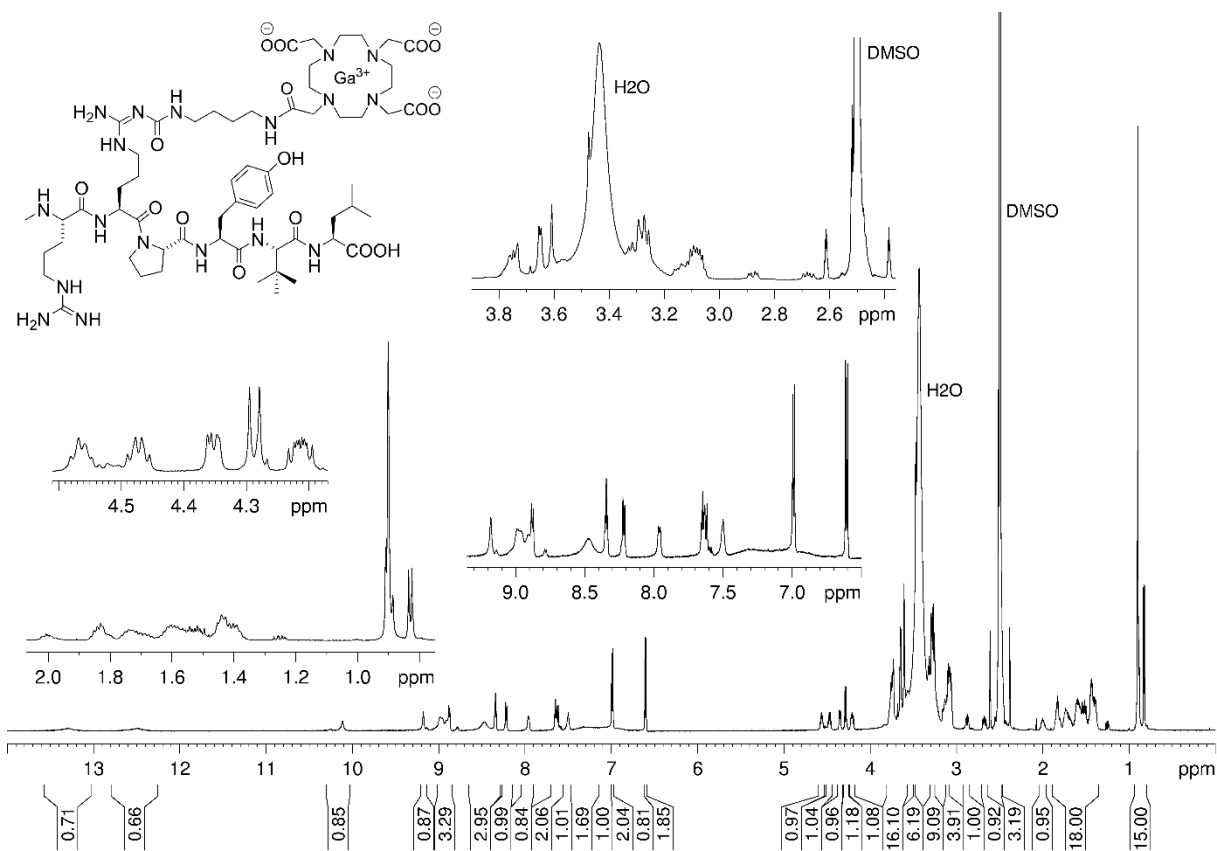

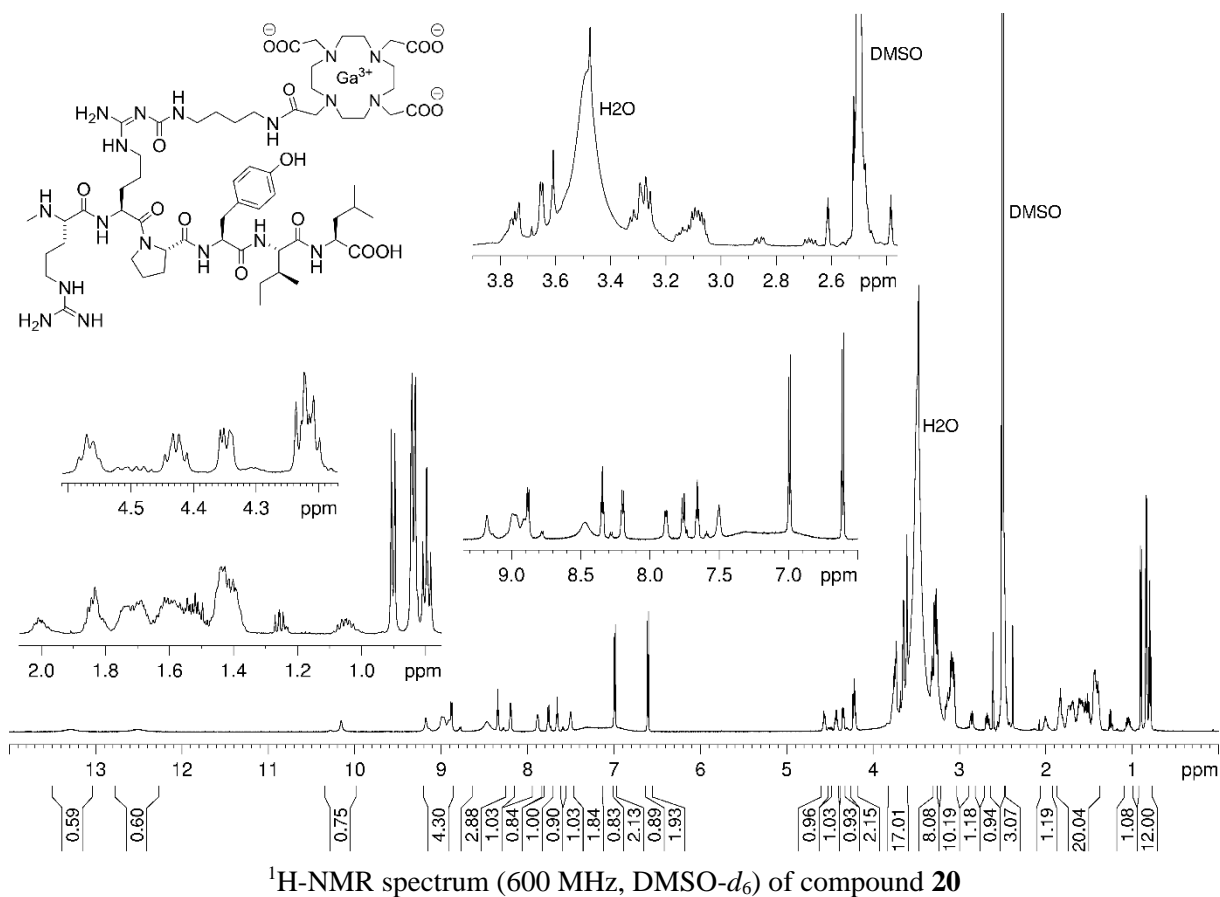

<sup>1</sup>H-NMR spectrum (600 MHz, DMSO-*d*<sub>6</sub>) of compound **20**

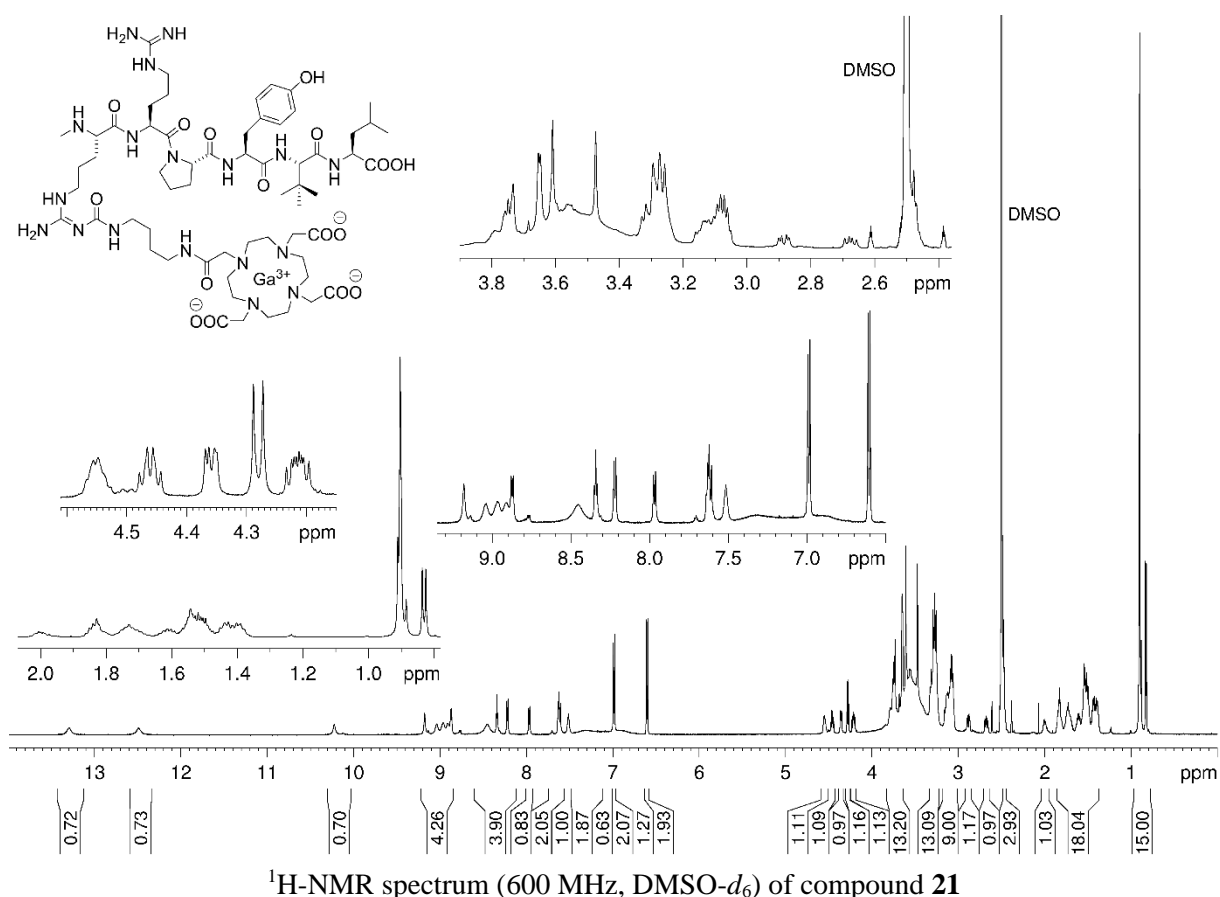

<sup>1</sup>H-NMR spectrum (600 MHz, DMSO-*d*<sub>6</sub>) of compound **21**

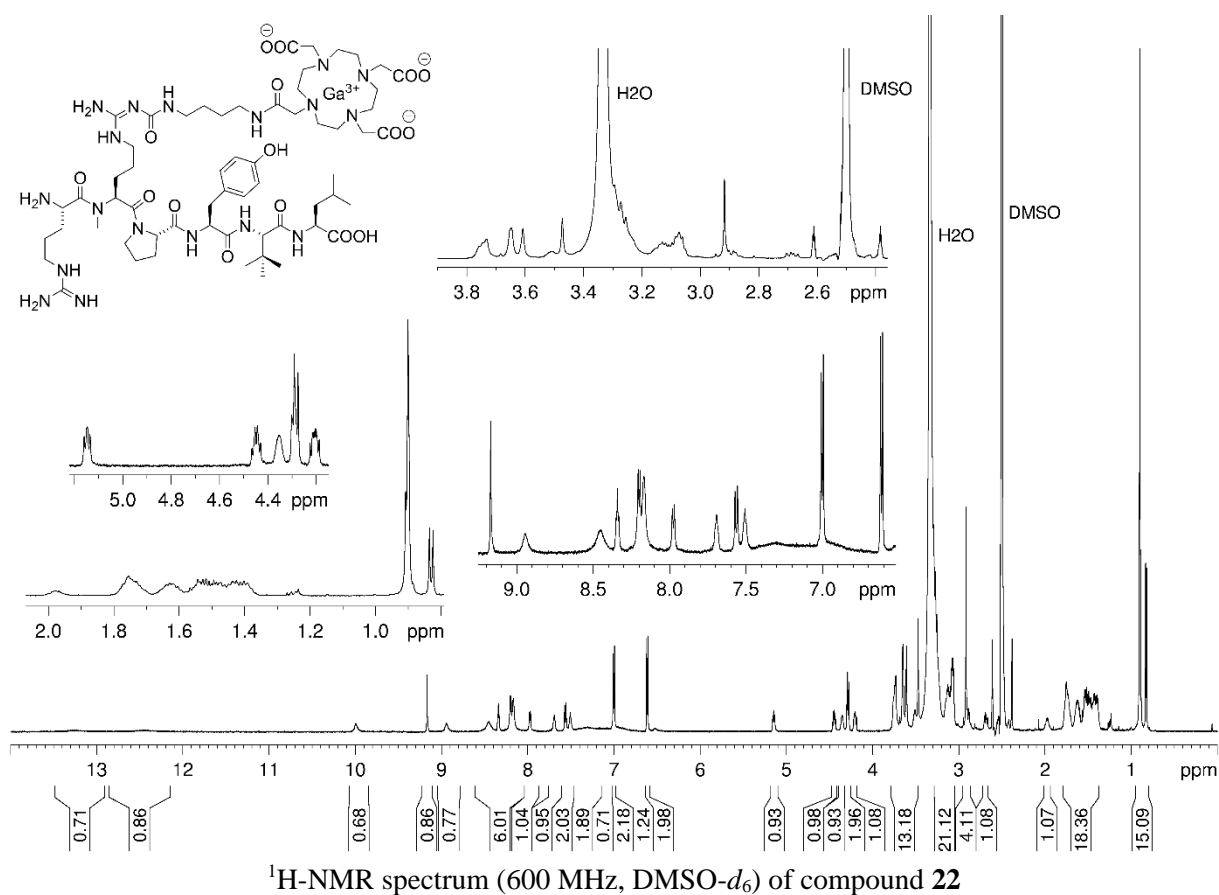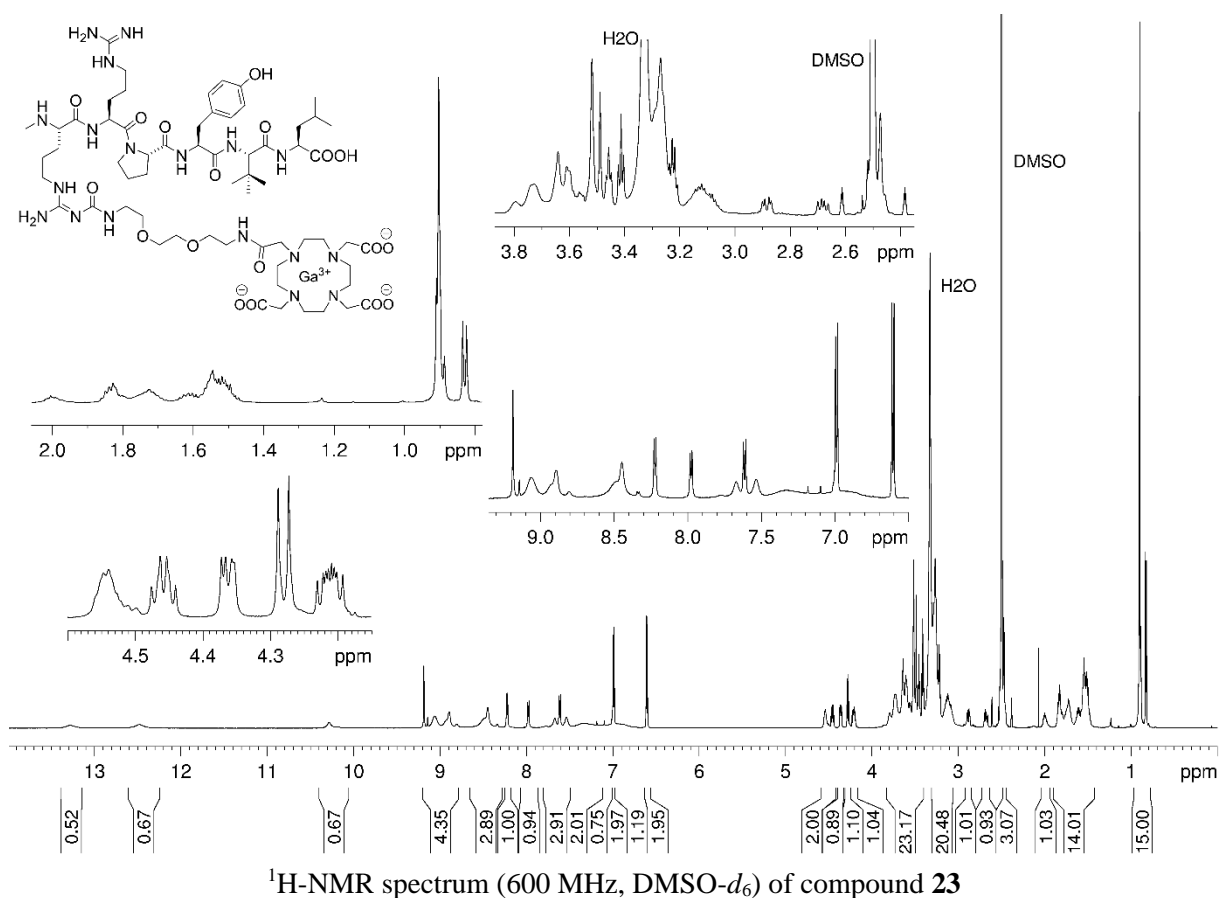

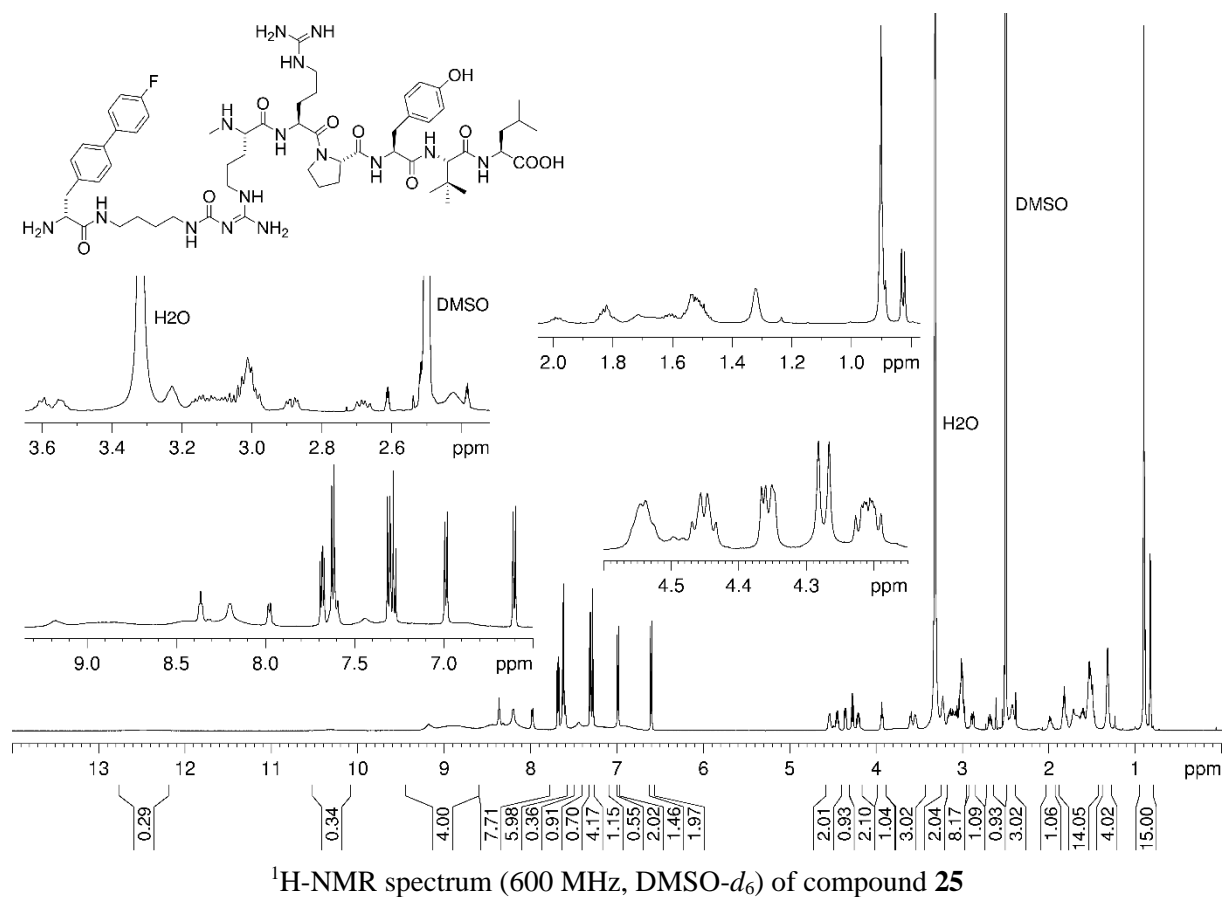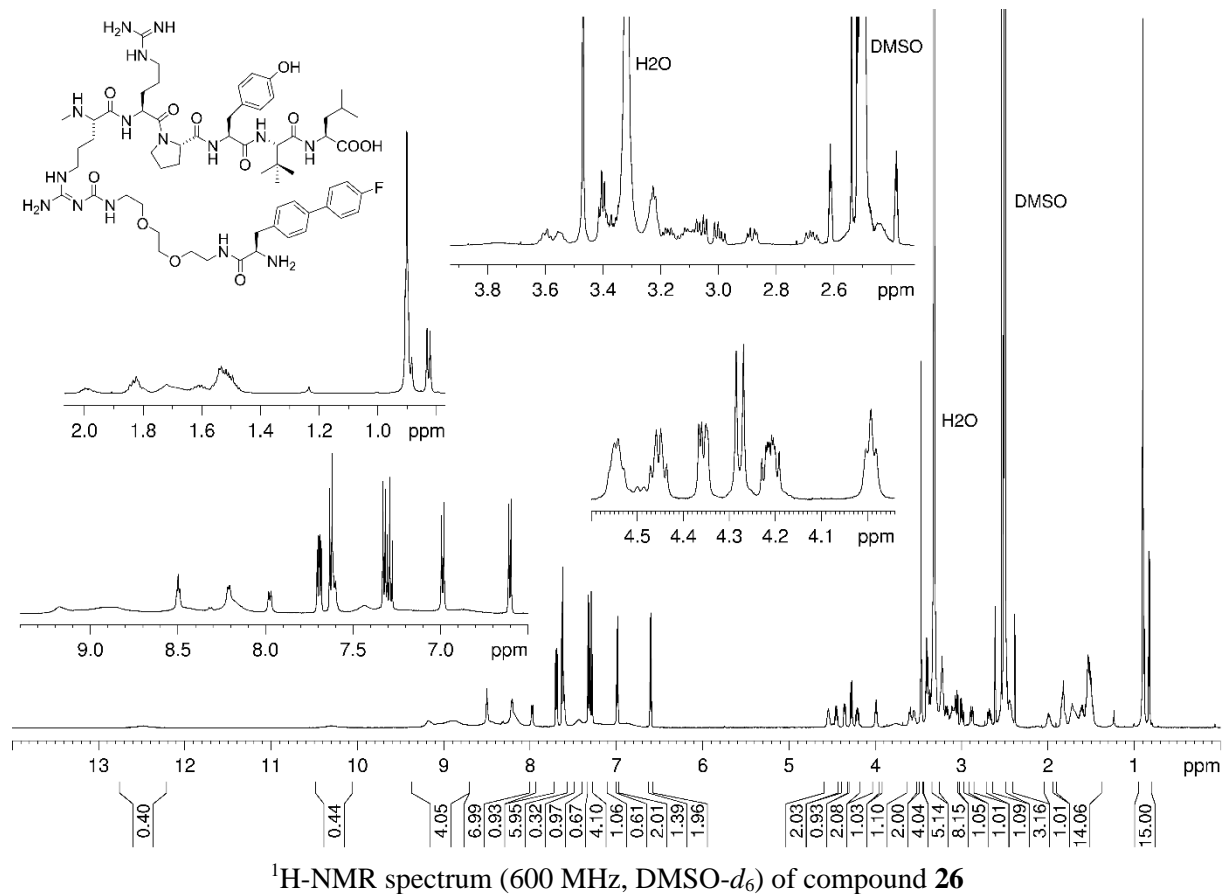

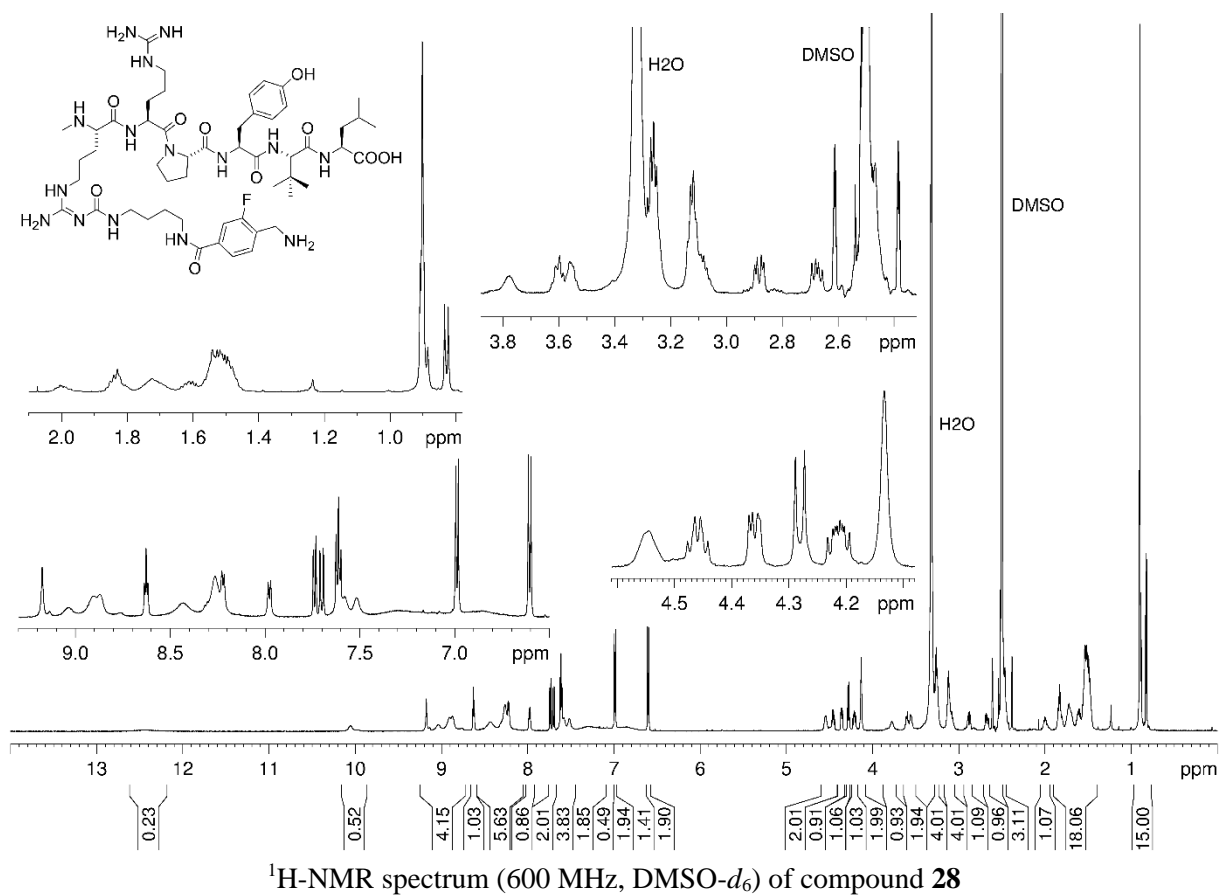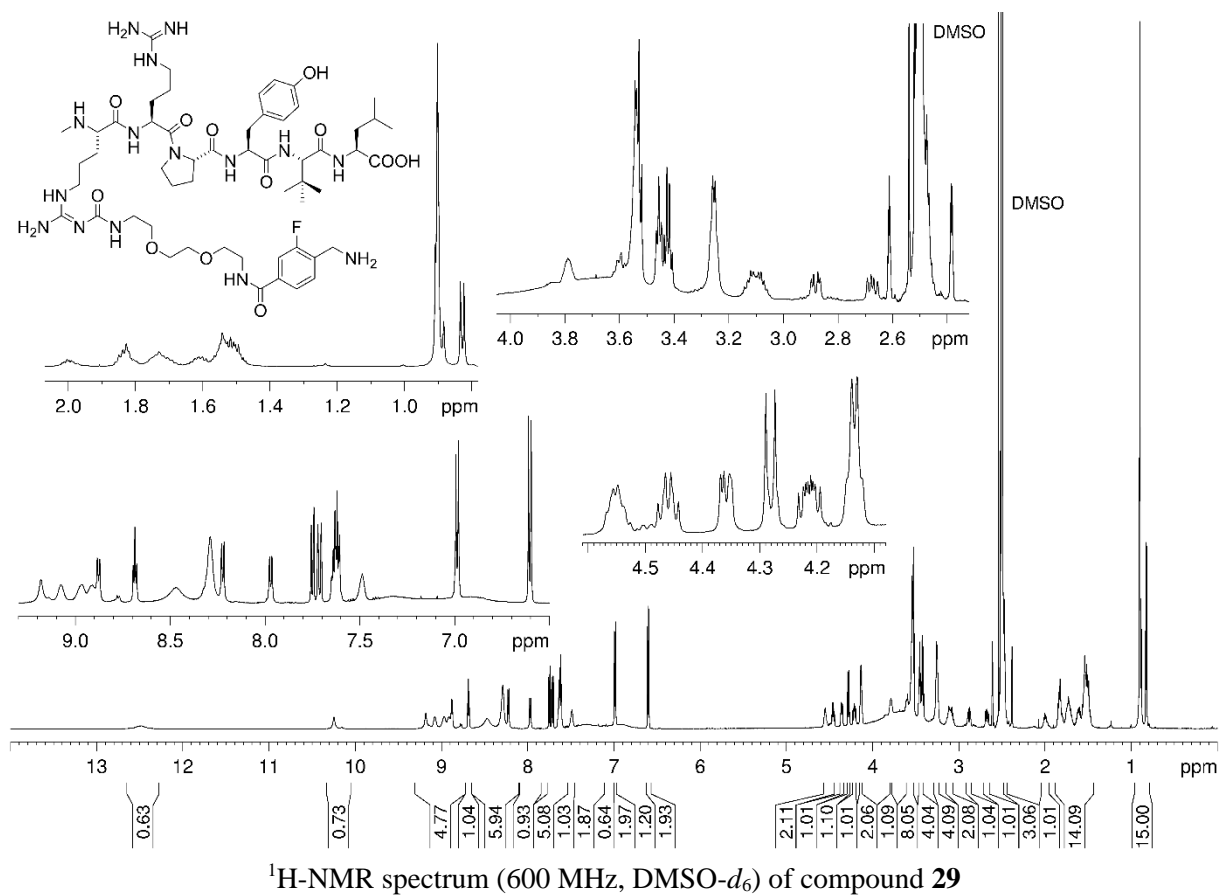

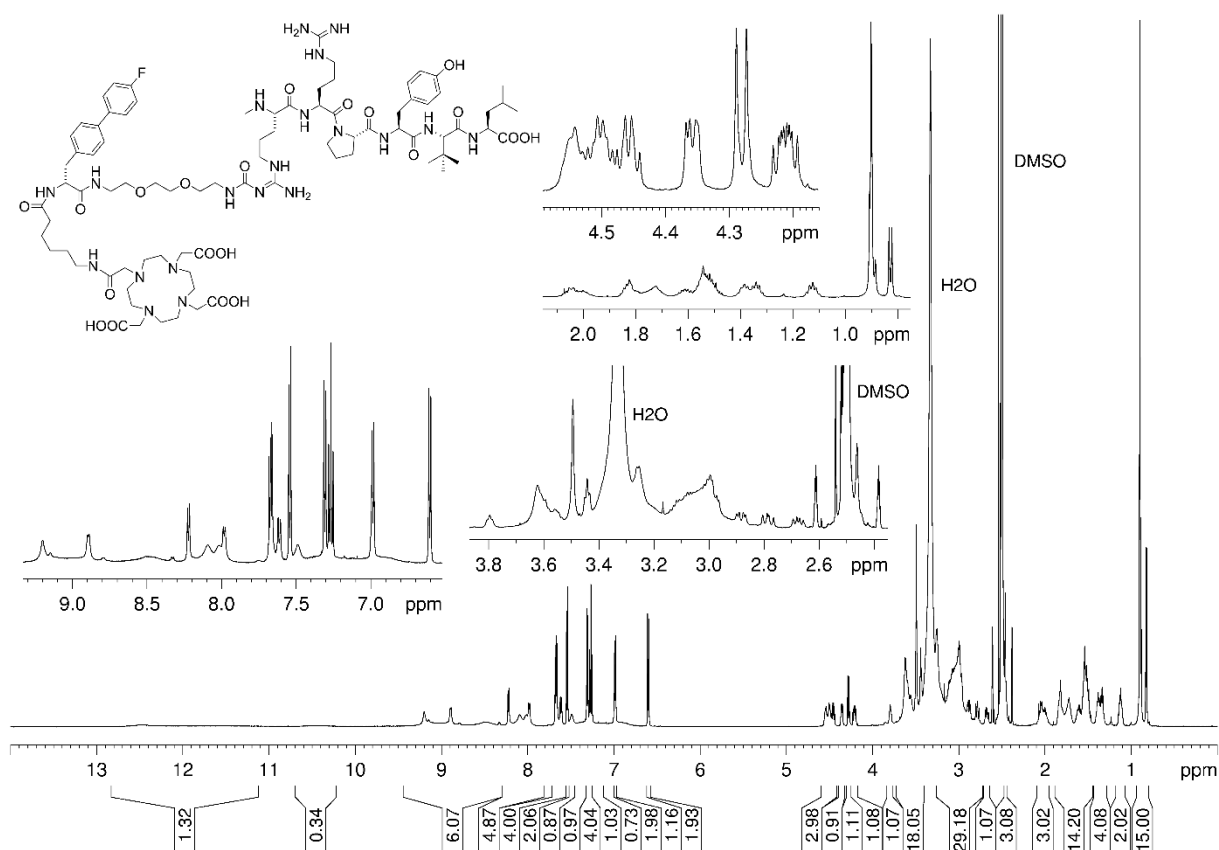

<sup>1</sup>H-NMR spectrum (600 MHz, DMSO-*d*<sub>6</sub>) of compound **32**

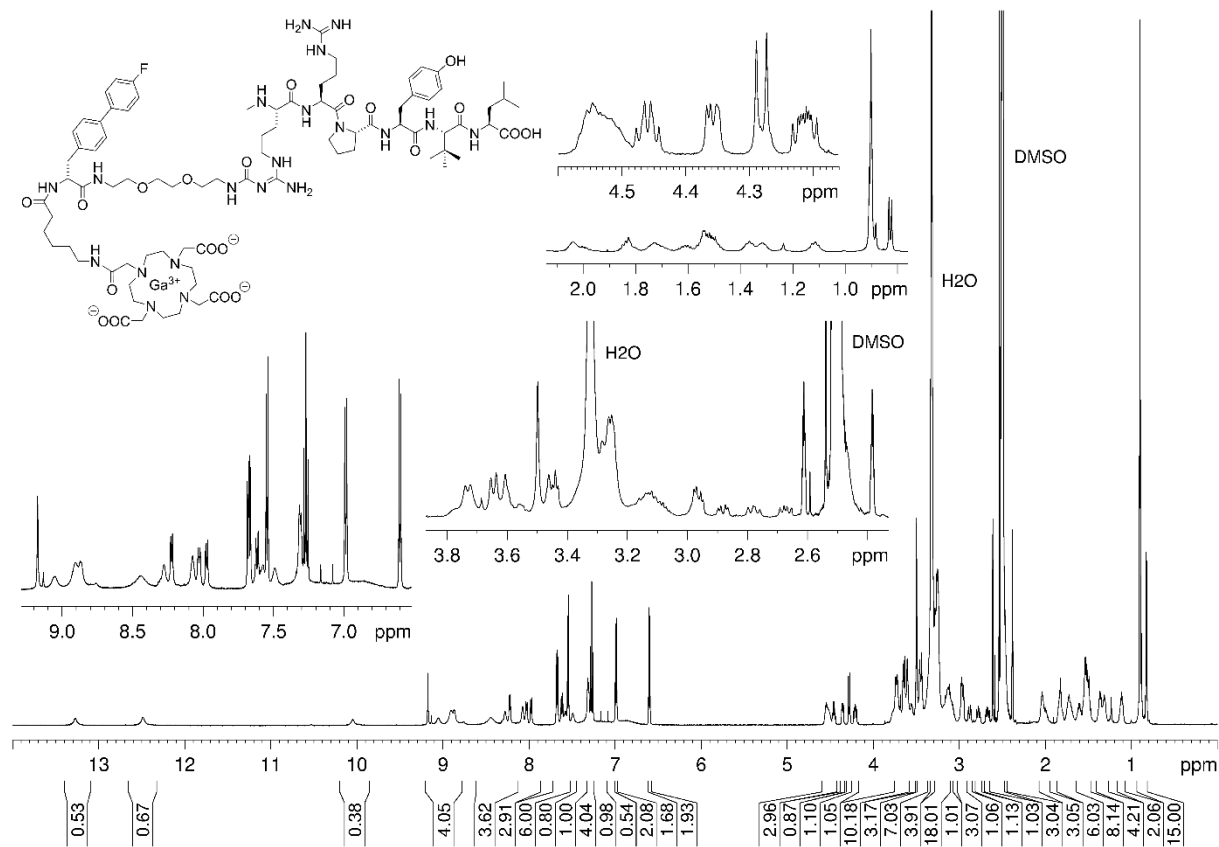

<sup>1</sup>H-NMR spectrum (600 MHz, DMSO-*d*<sub>6</sub>) of compound **33**

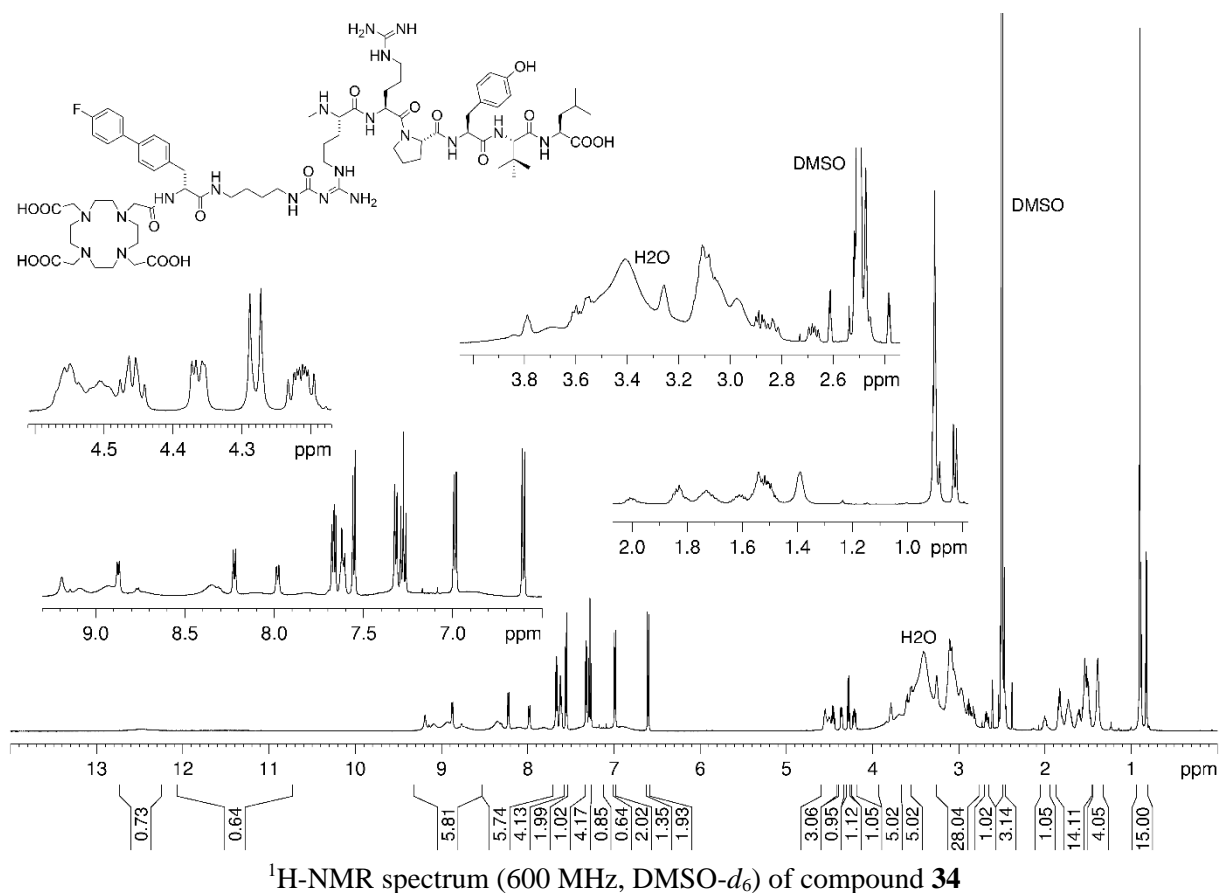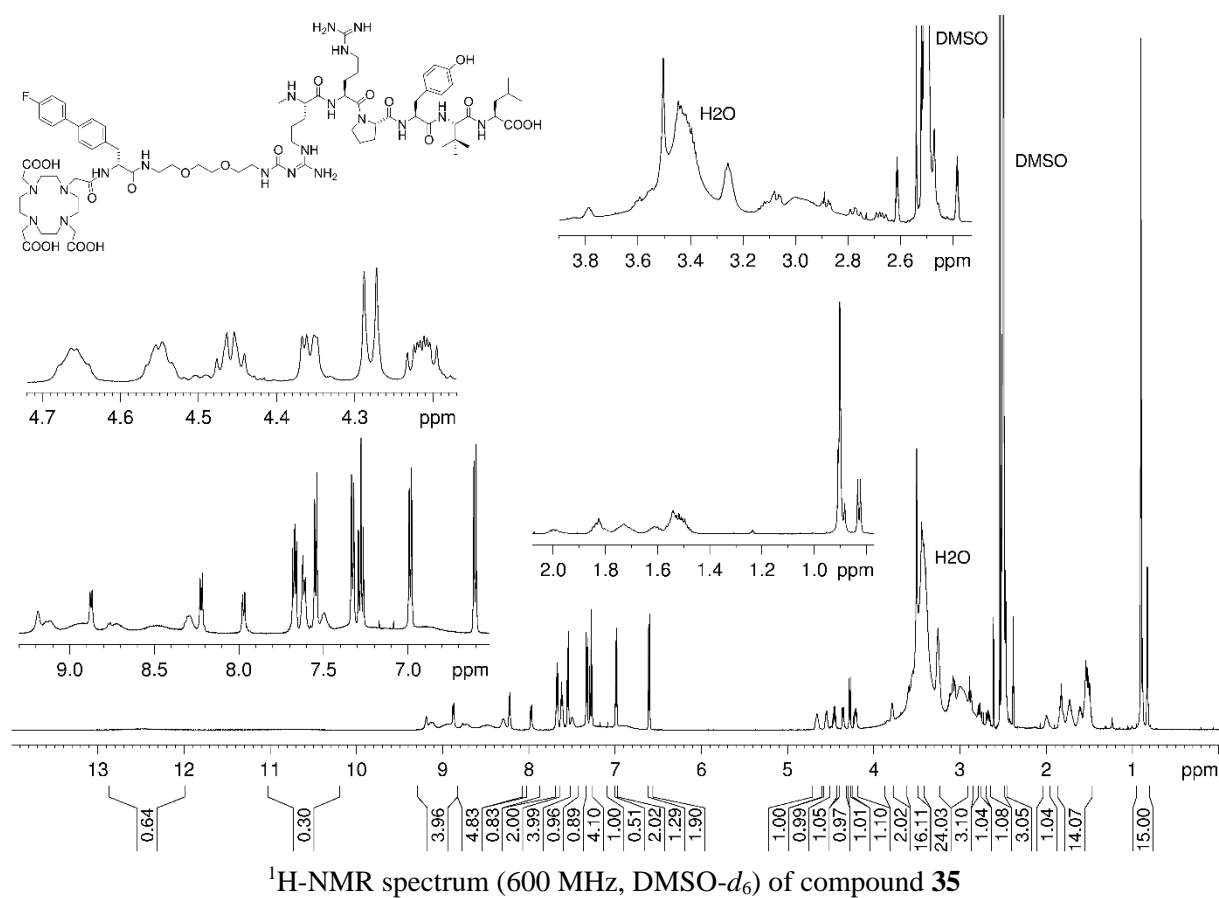

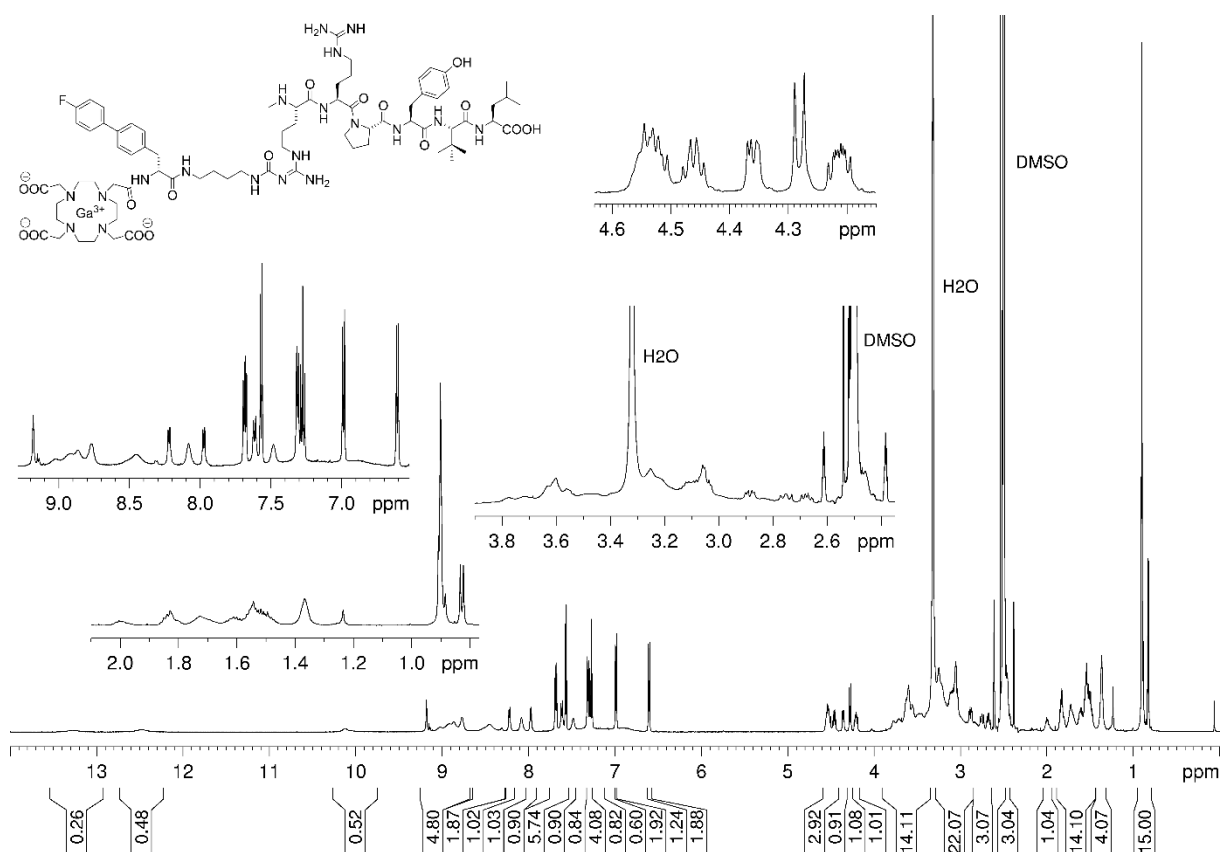

<sup>1</sup>H-NMR spectrum (600 MHz, DMSO-*d*<sub>6</sub>) of compound **36**

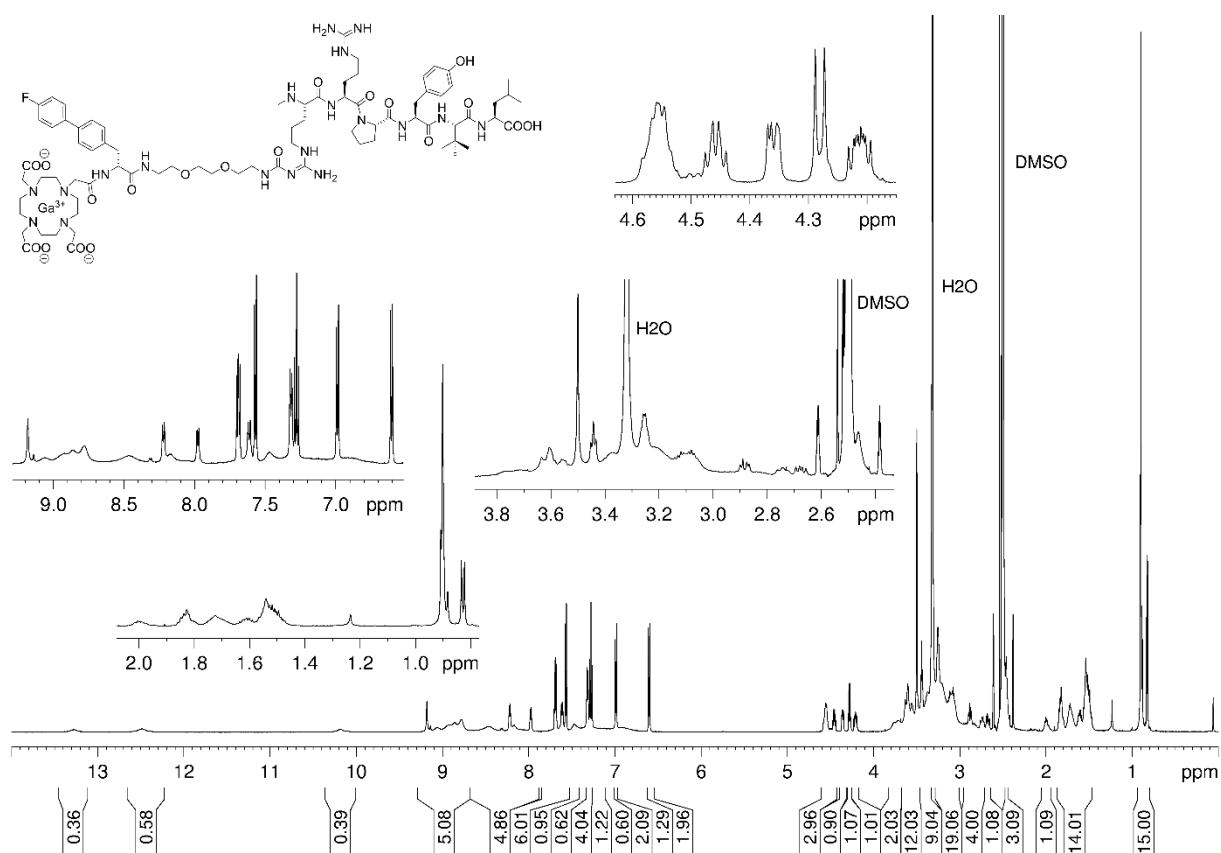

<sup>1</sup>H-NMR spectrum (600 MHz, DMSO-*d*<sub>6</sub>) of compound **37**



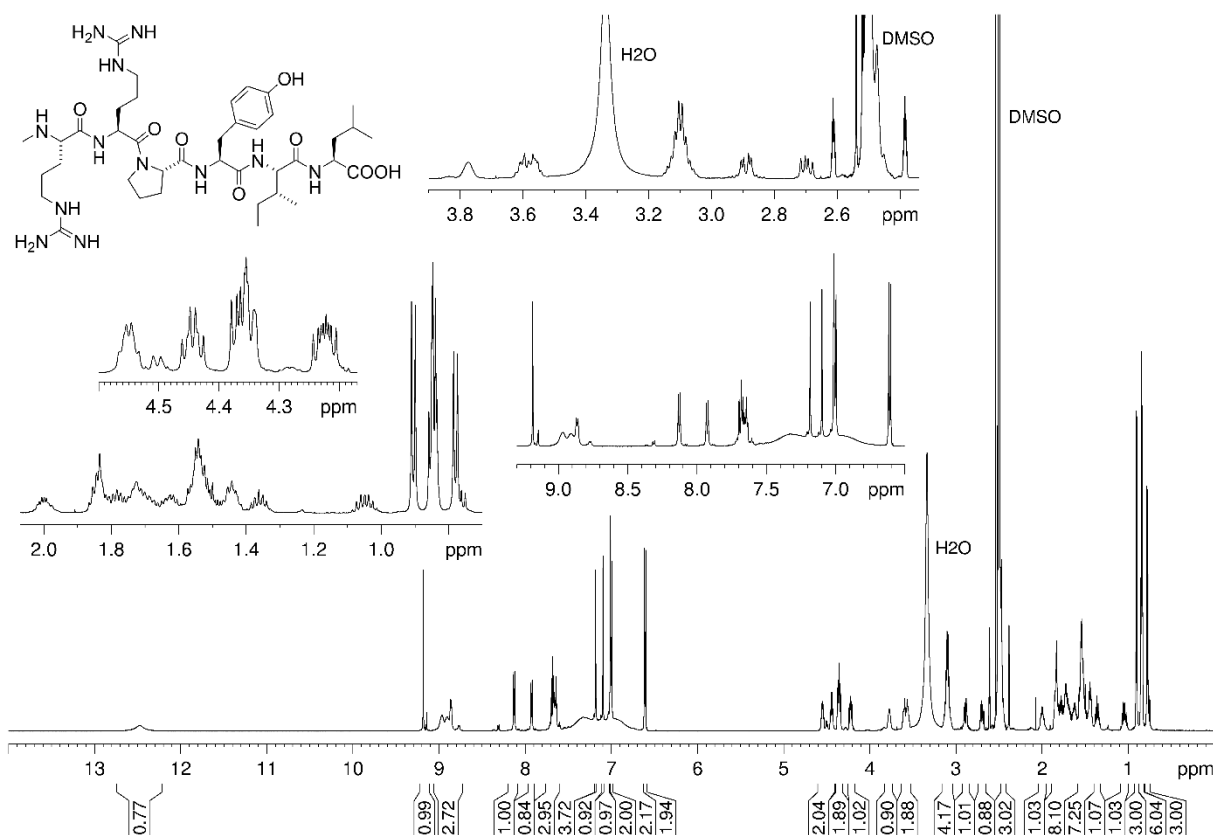

<sup>1</sup>H-NMR spectrum (600 MHz, DMSO-*d*<sub>6</sub>) of compound **38**

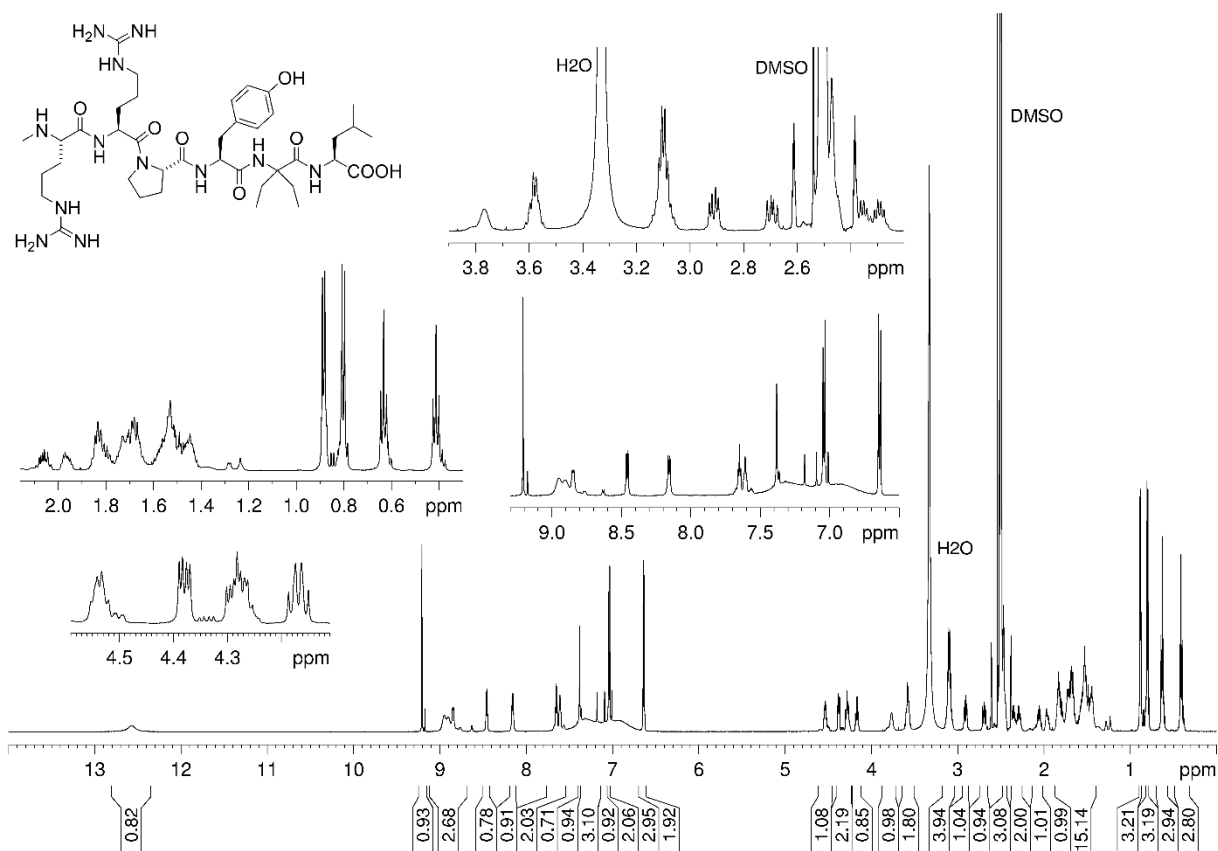

<sup>1</sup>H-NMR spectrum (600 MHz, DMSO-*d*<sub>6</sub>) of compound **39**

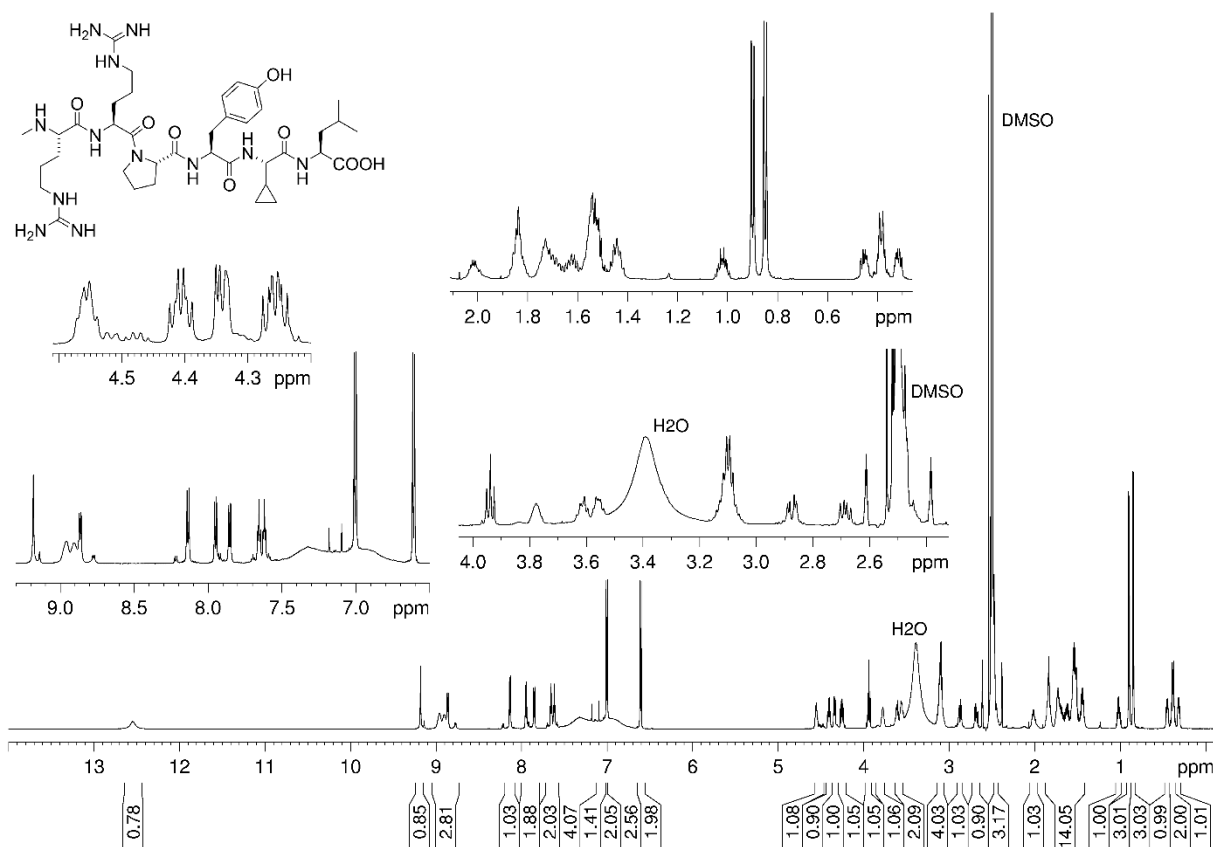

**<sup>1</sup>H-NMR spectrum (600 MHz, DMSO-*d*<sub>6</sub>) of compound **40****

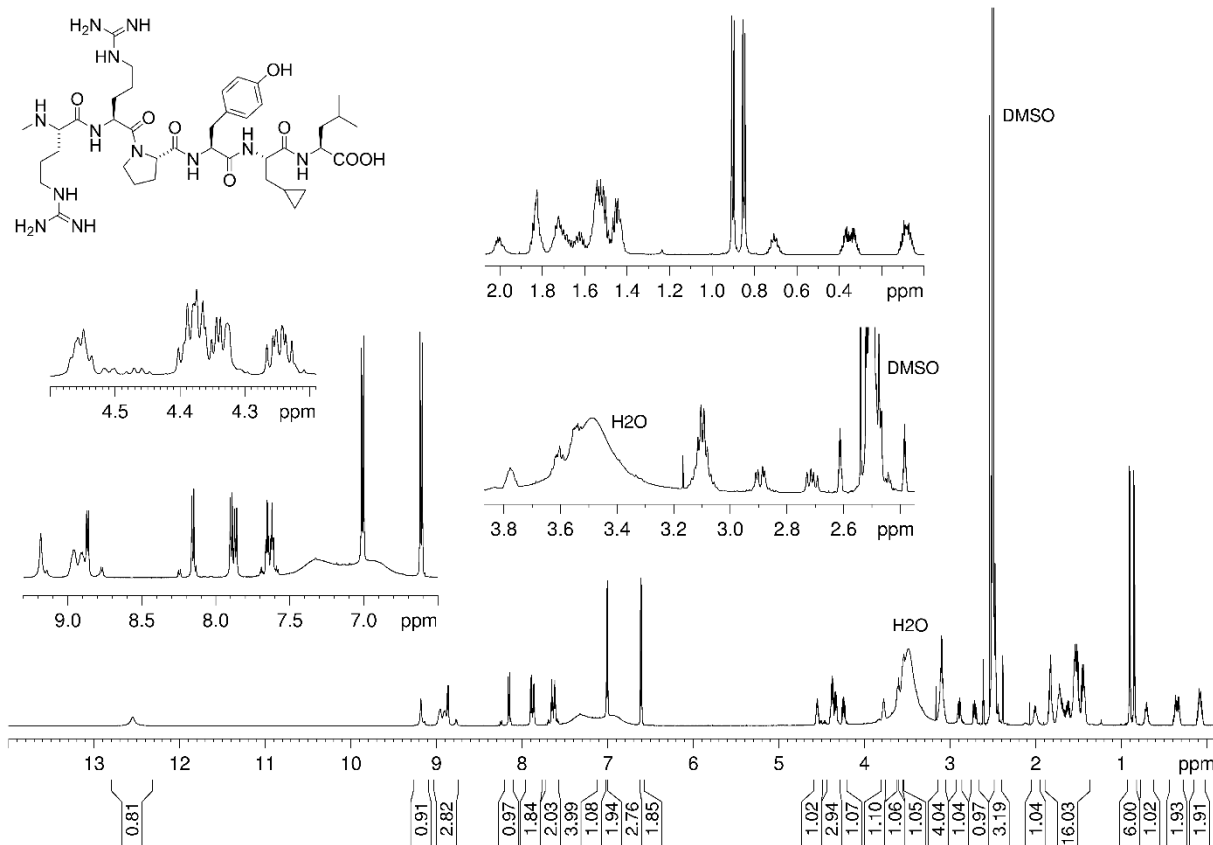

**<sup>1</sup>H-NMR spectrum (600 MHz, DMSO-*d*<sub>6</sub>) of compound **41****

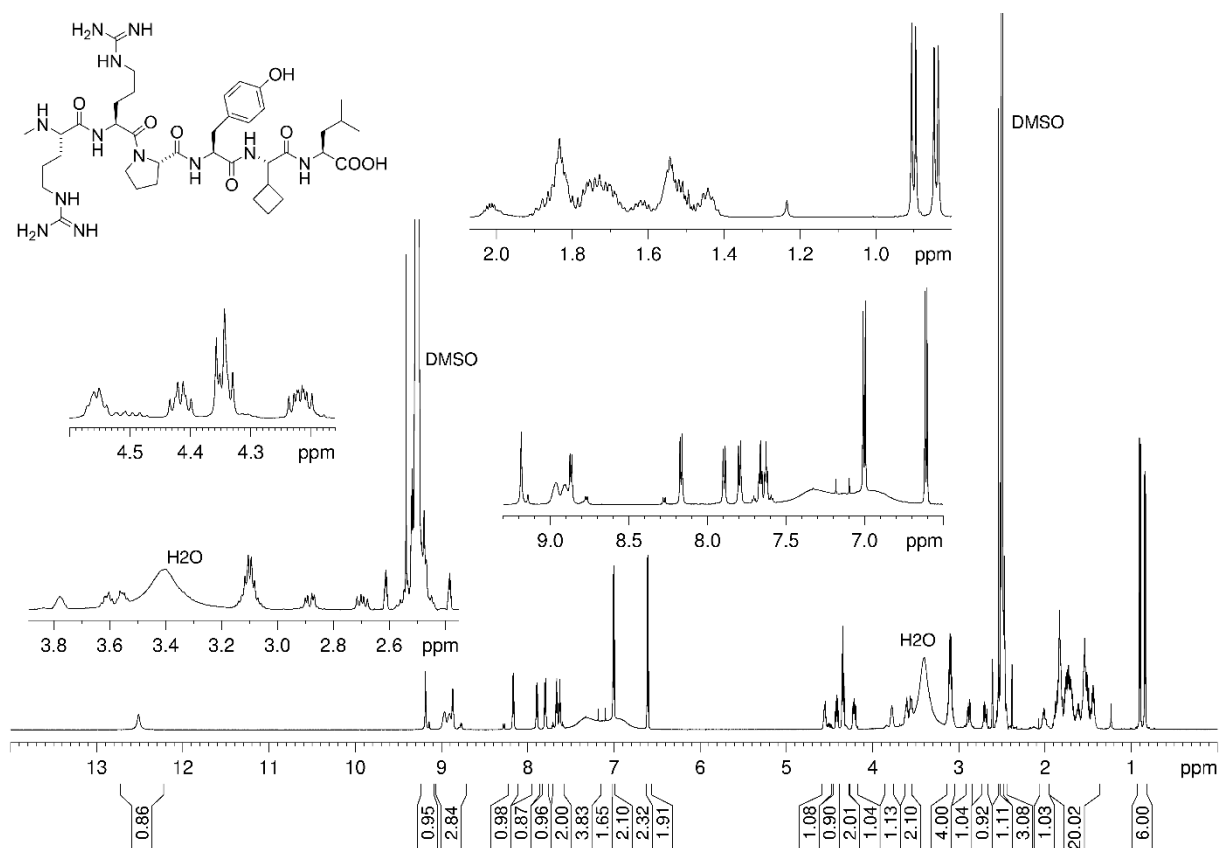

**<sup>1</sup>H-NMR spectrum (600 MHz, DMSO-*d*<sub>6</sub>) of compound **42****

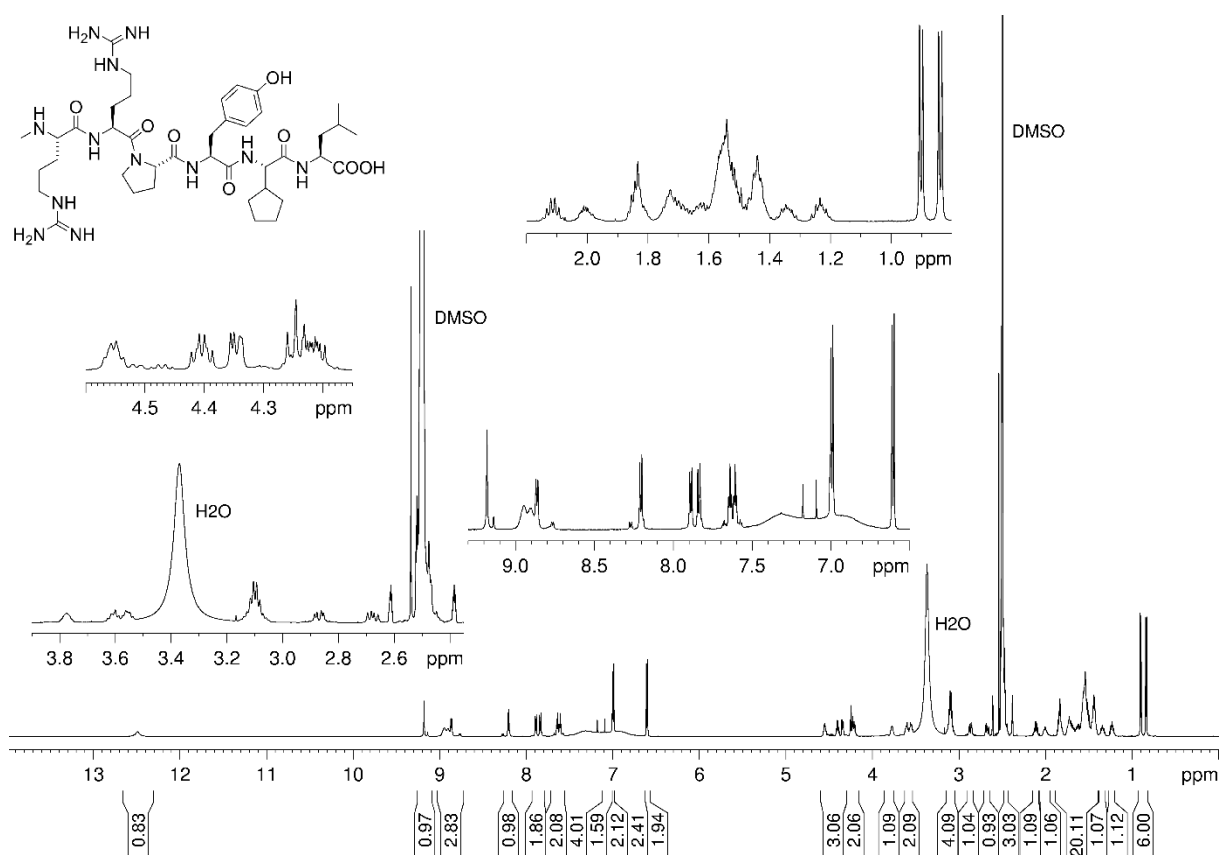

**<sup>1</sup>H-NMR spectrum (600 MHz, DMSO-*d*<sub>6</sub>) of compound **43****

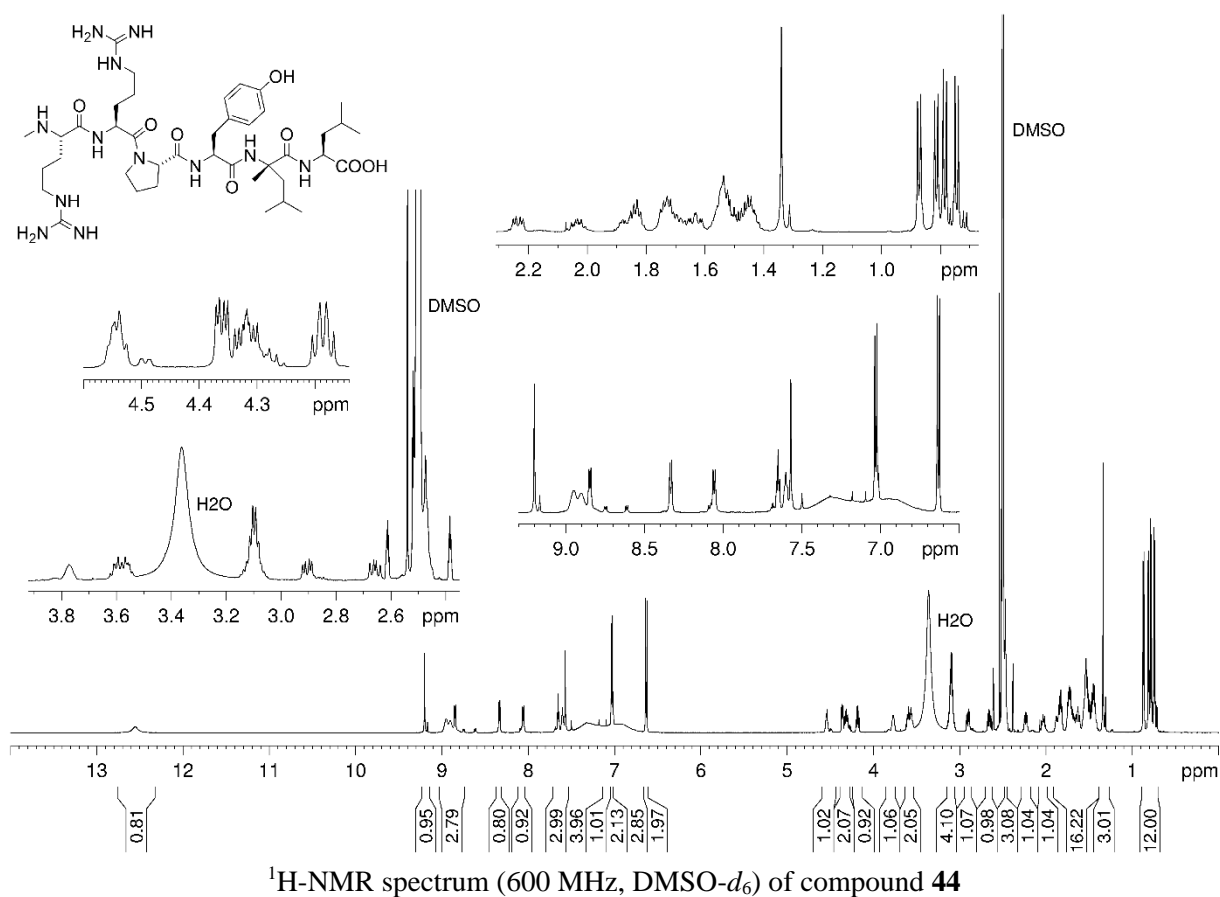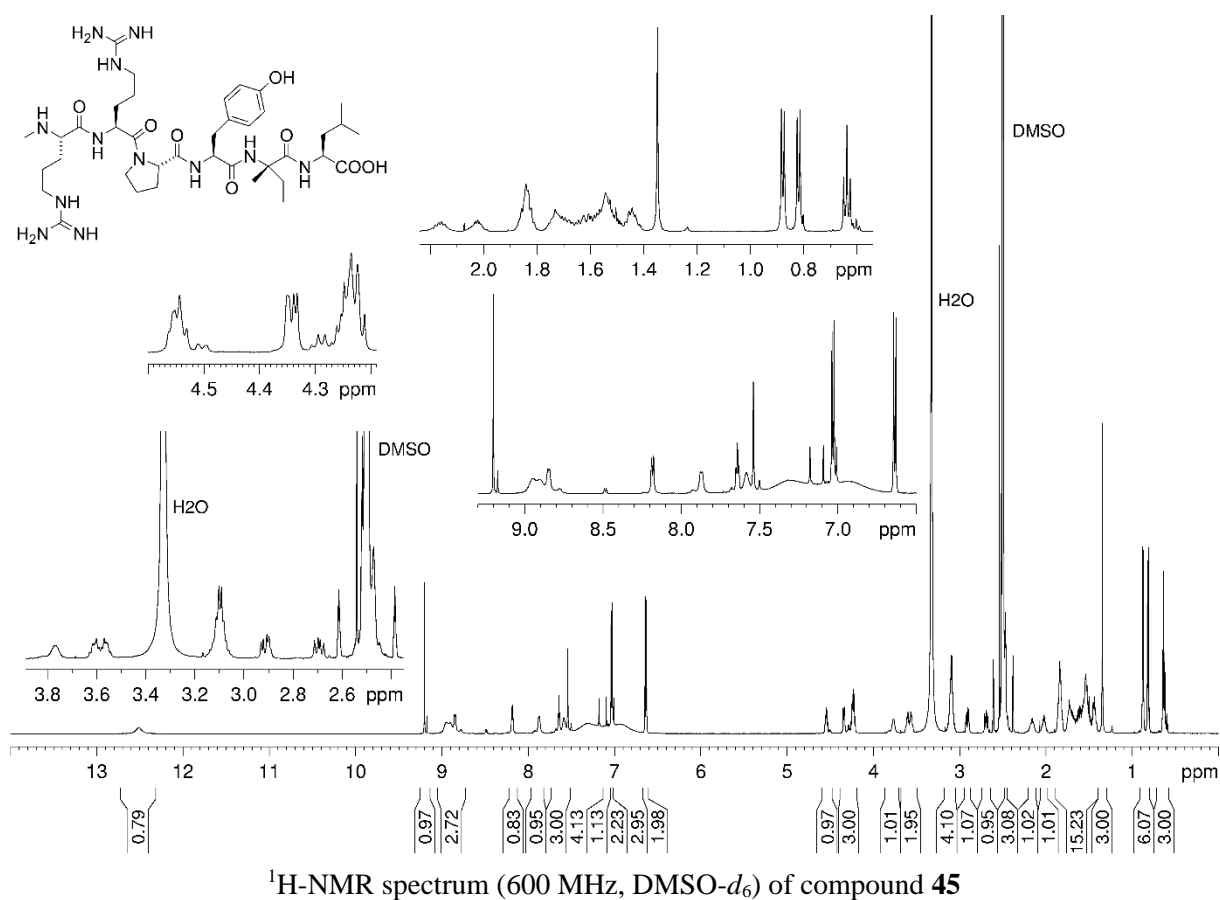

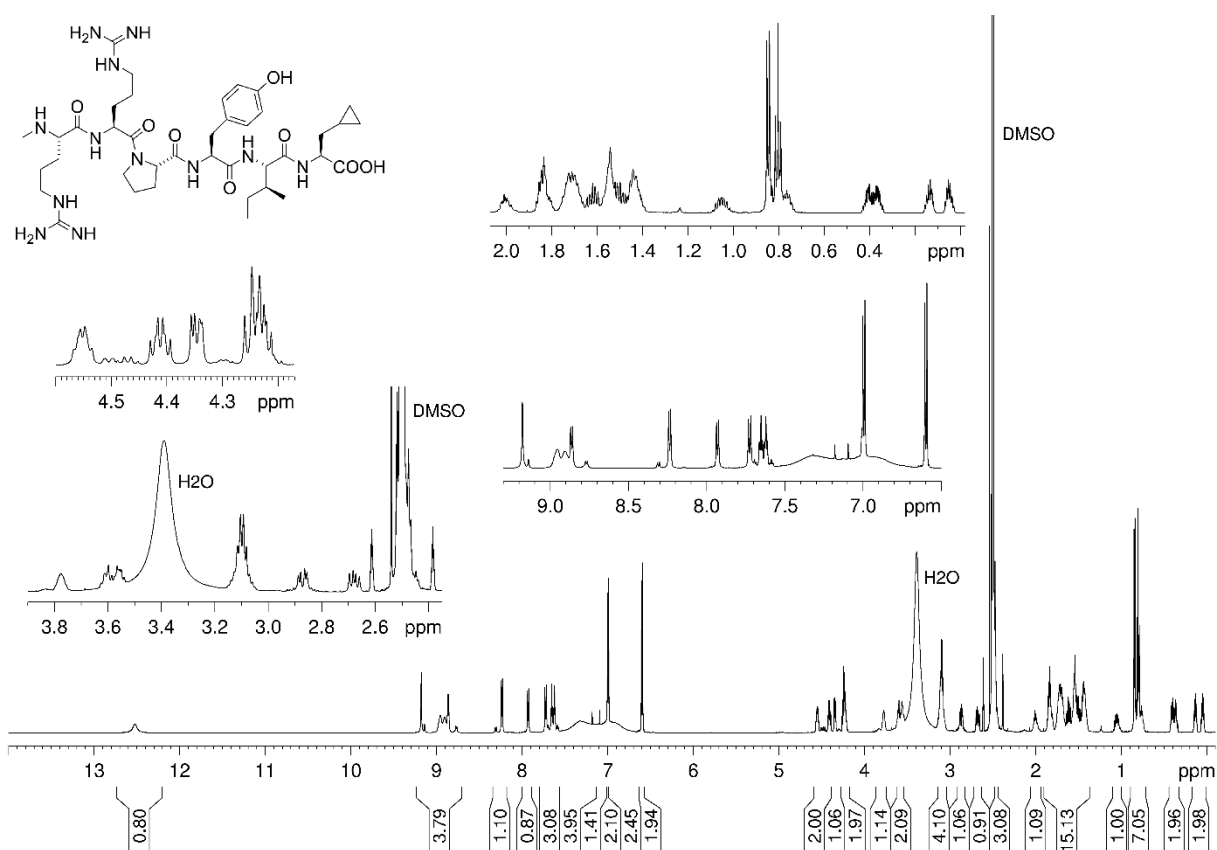

$^1\text{H}$ -NMR spectrum (600 MHz,  $\text{DMSO}-d_6$ ) of compound **46**

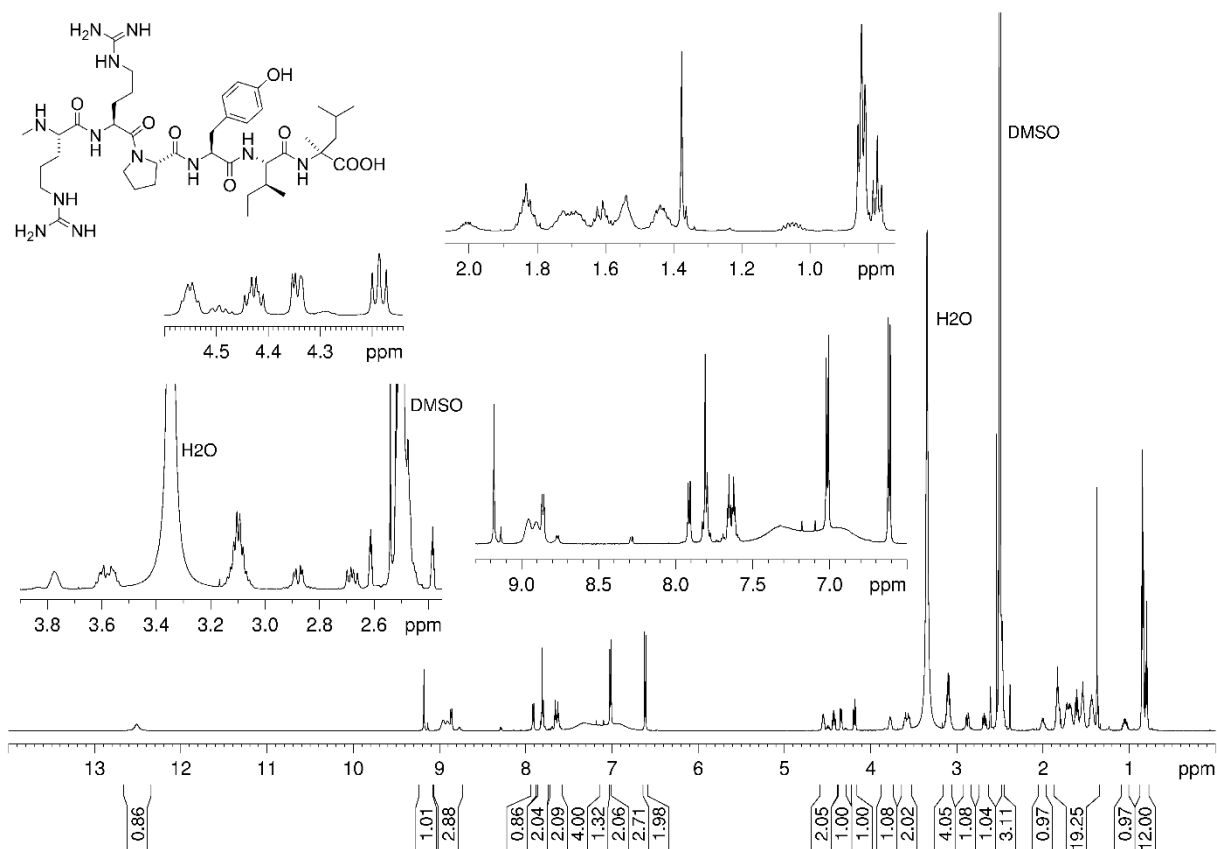

$^1\text{H}$ -NMR spectrum (600 MHz,  $\text{DMSO}-d_6$ ) of compound **47**

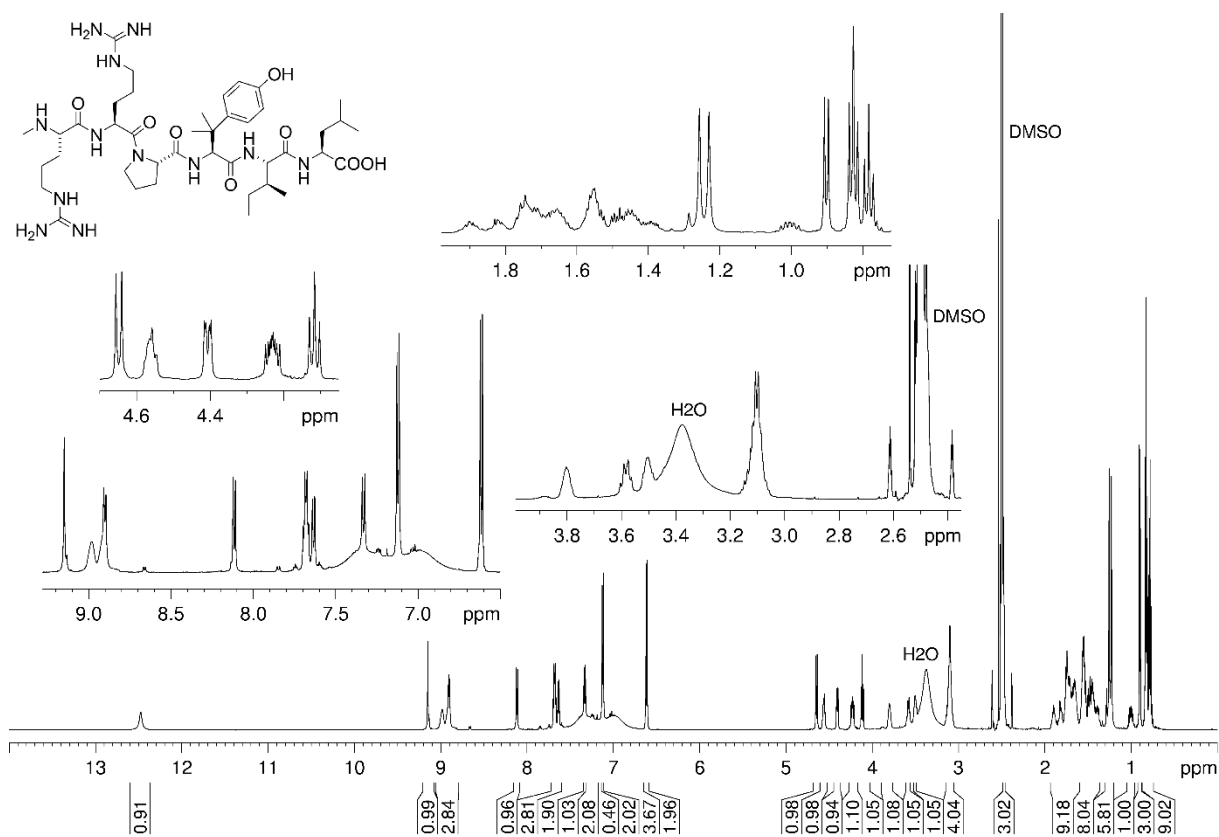

<sup>1</sup>H-NMR spectrum (600 MHz, DMSO-*d*<sub>6</sub>) of compound **48**

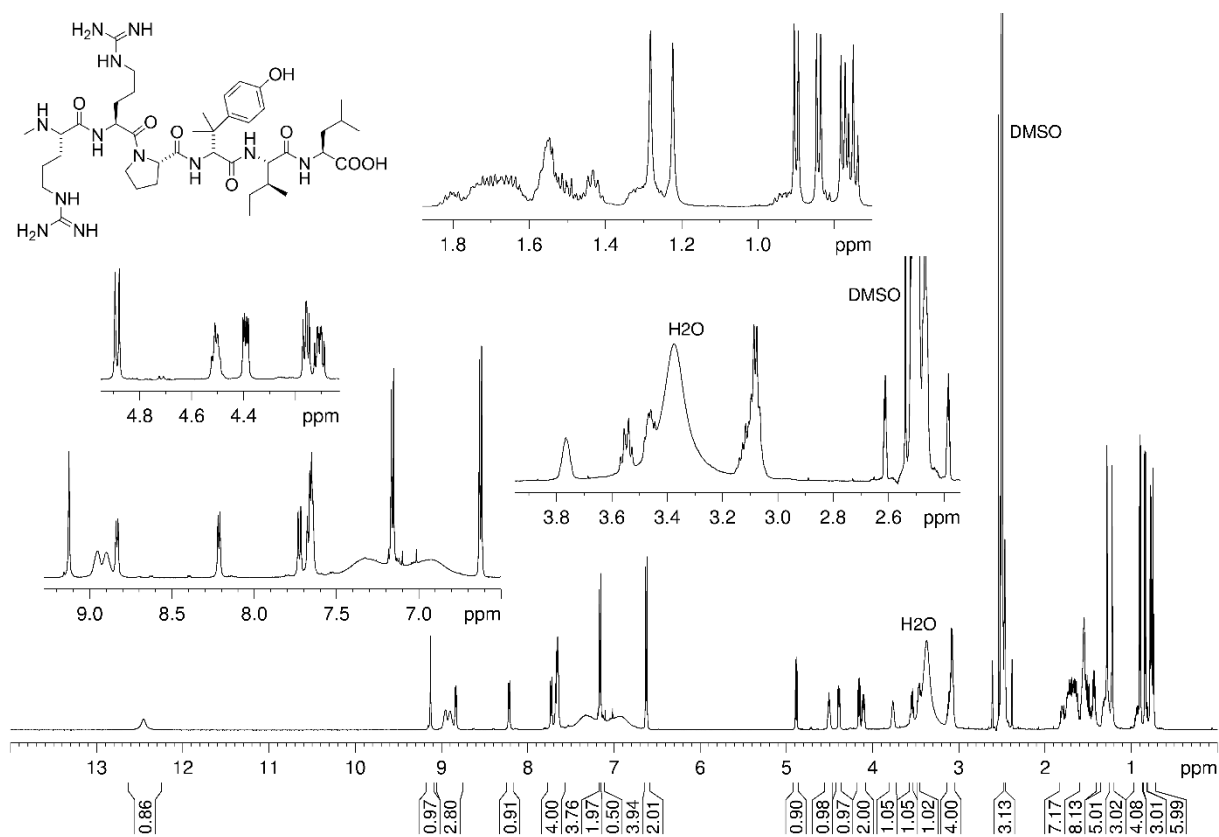

<sup>1</sup>H-NMR spectrum (600 MHz, DMSO-*d*<sub>6</sub>) of compound **49**

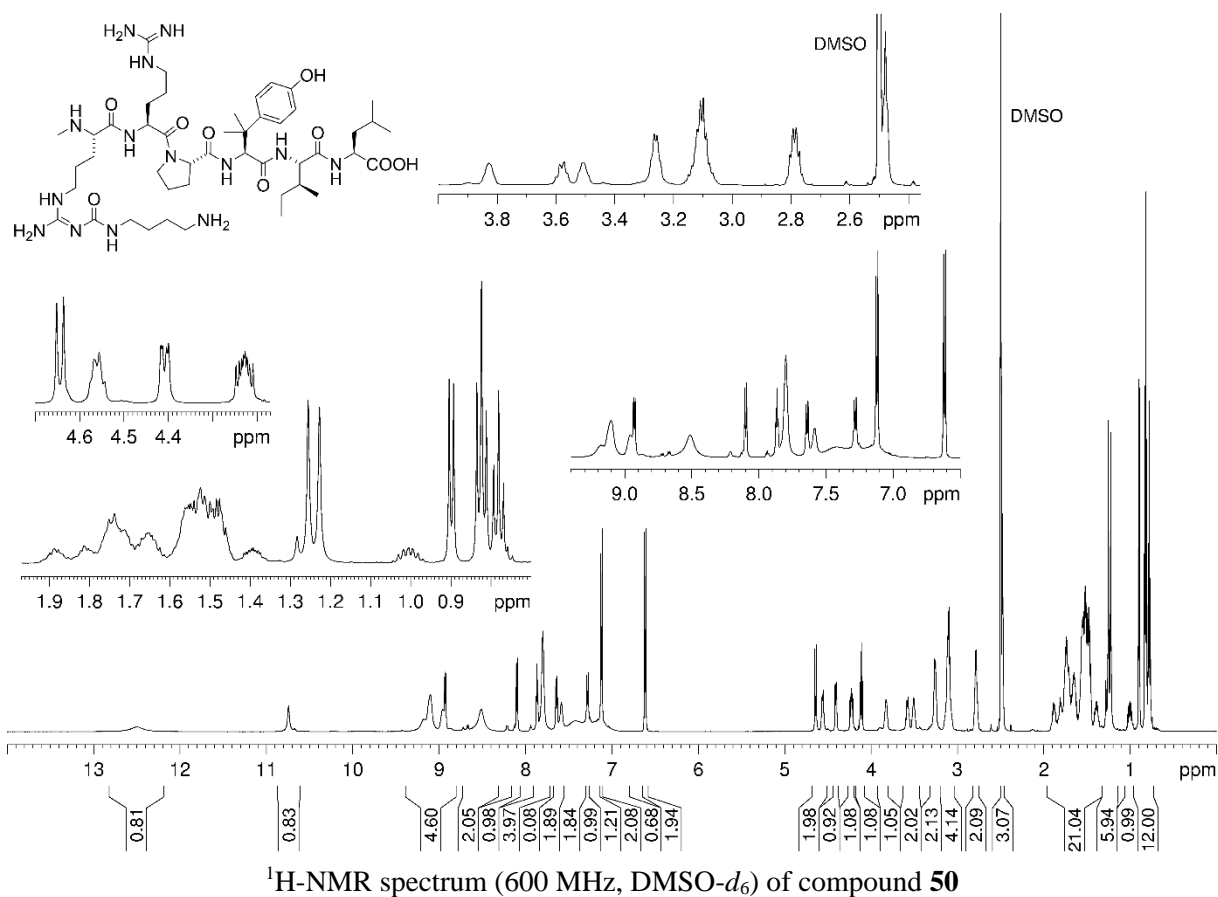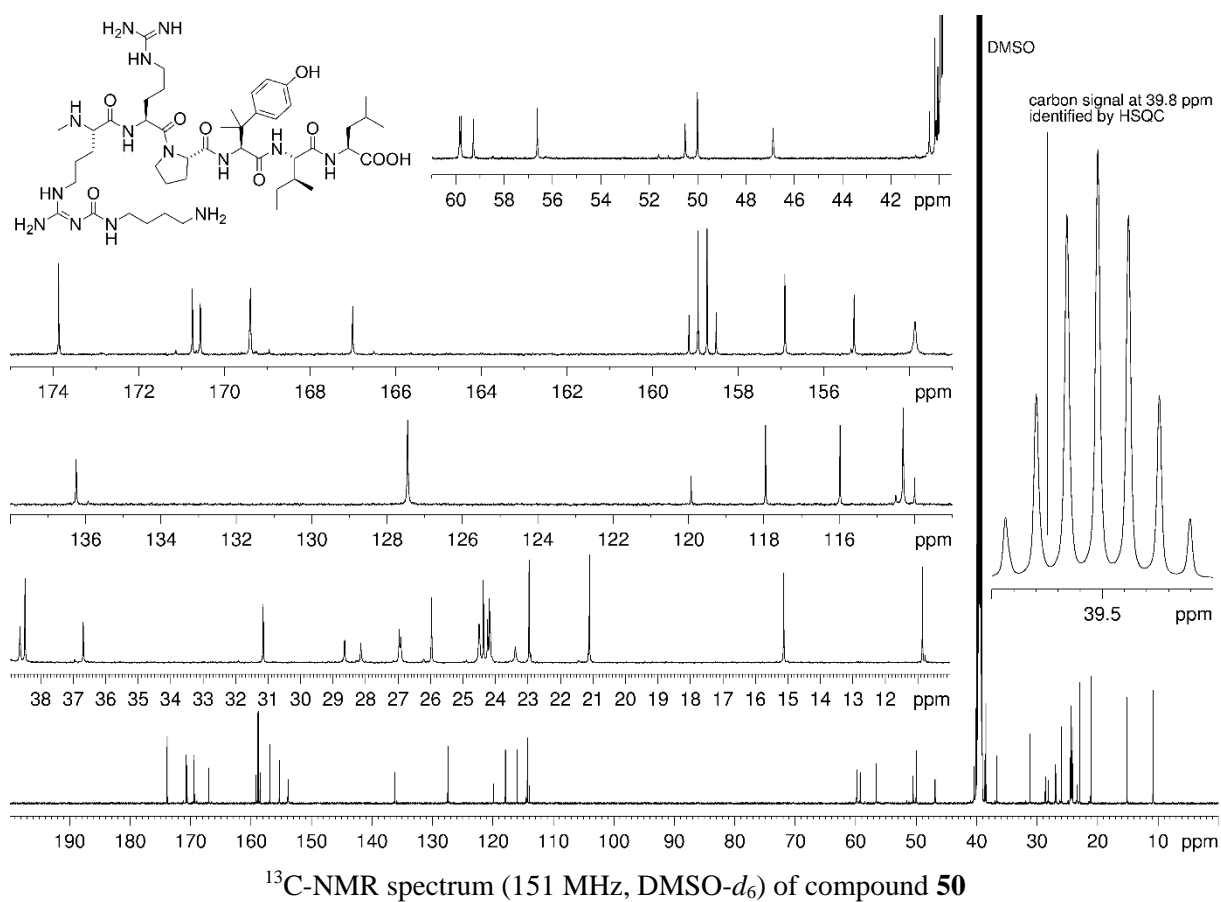

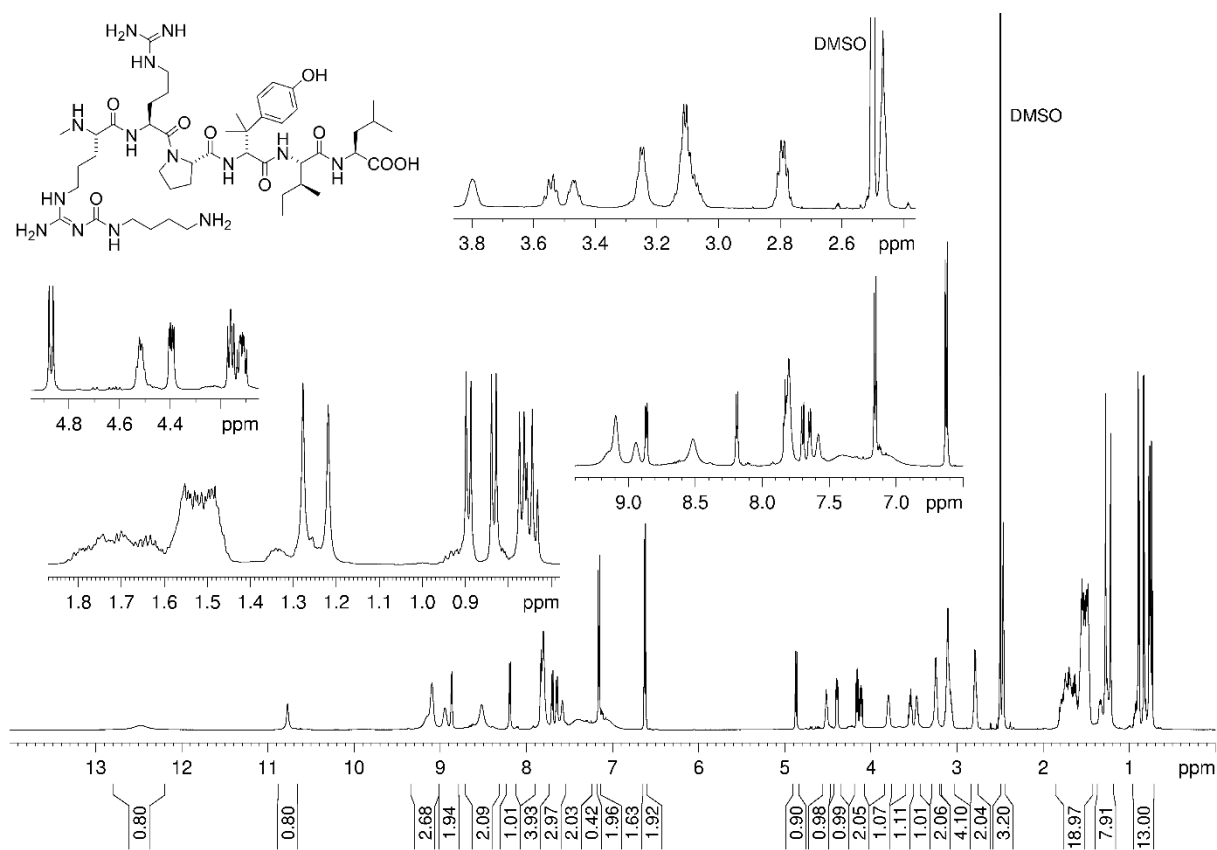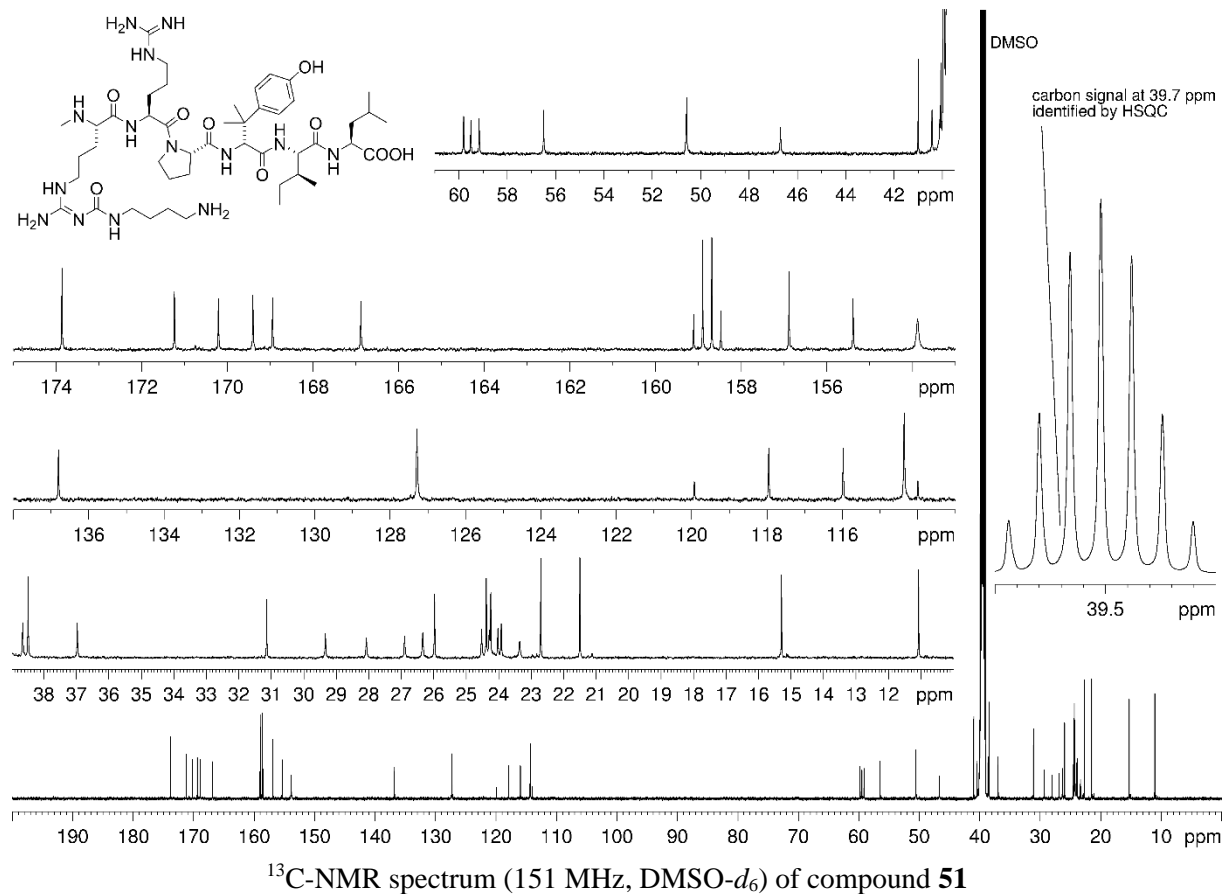



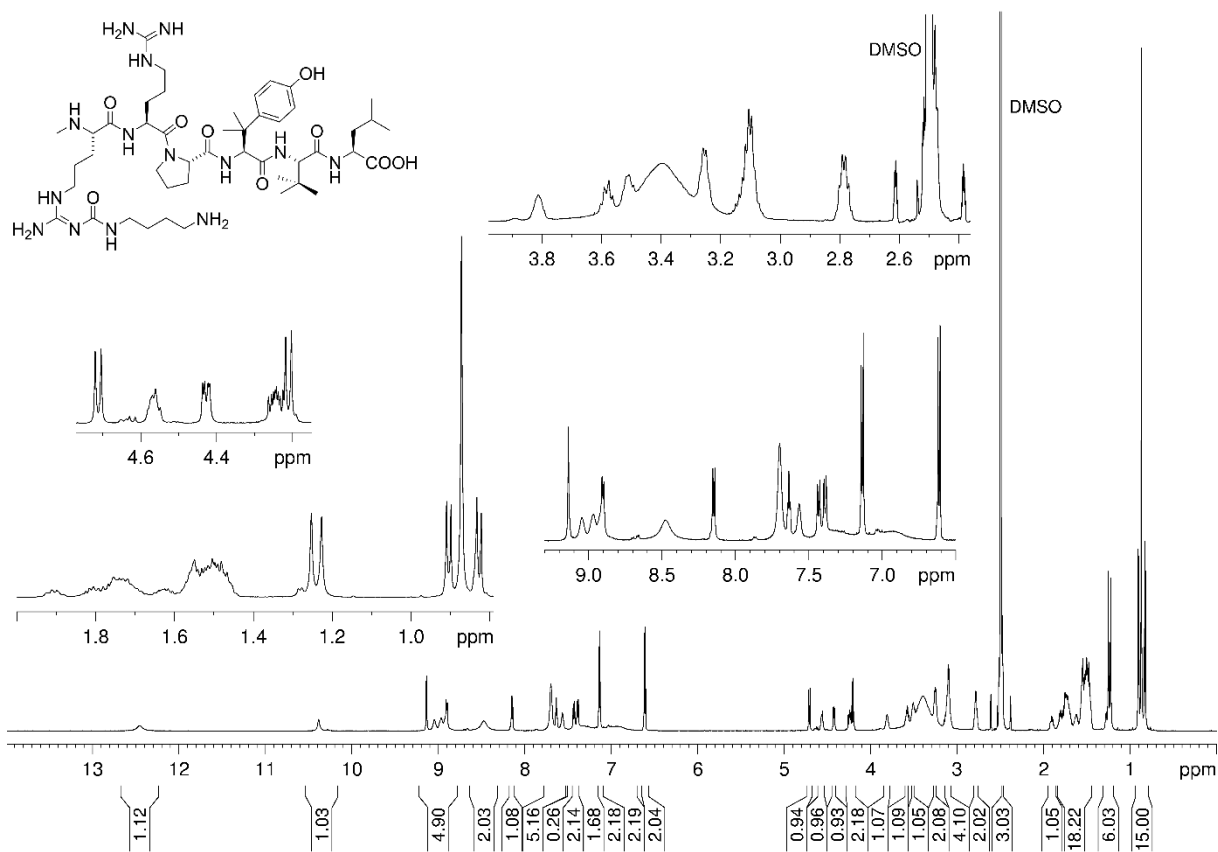

$^1\text{H}$ -NMR spectrum (600 MHz,  $\text{DMSO}-d_6$ ) of compound **52**

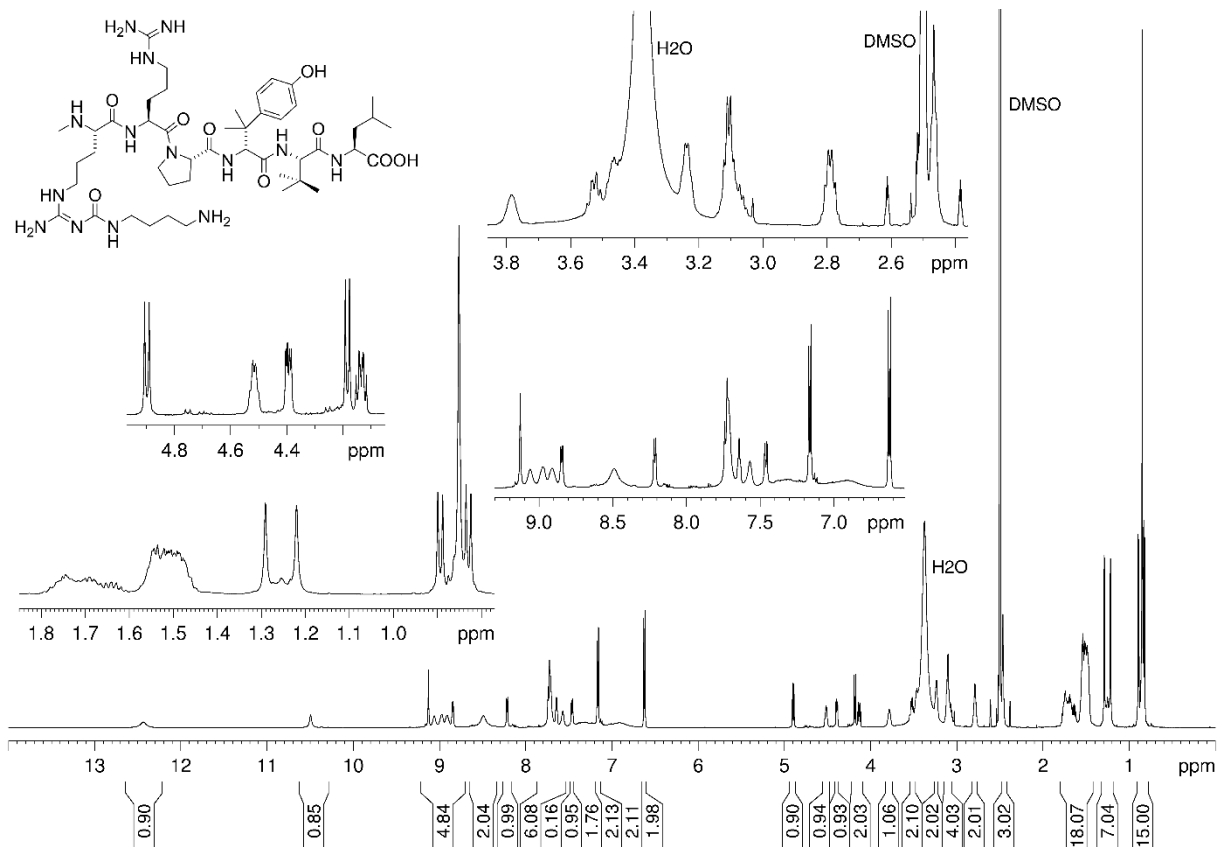

$^1\text{H}$ -NMR spectrum (600 MHz,  $\text{DMSO}-d_6$ ) of compound **53**

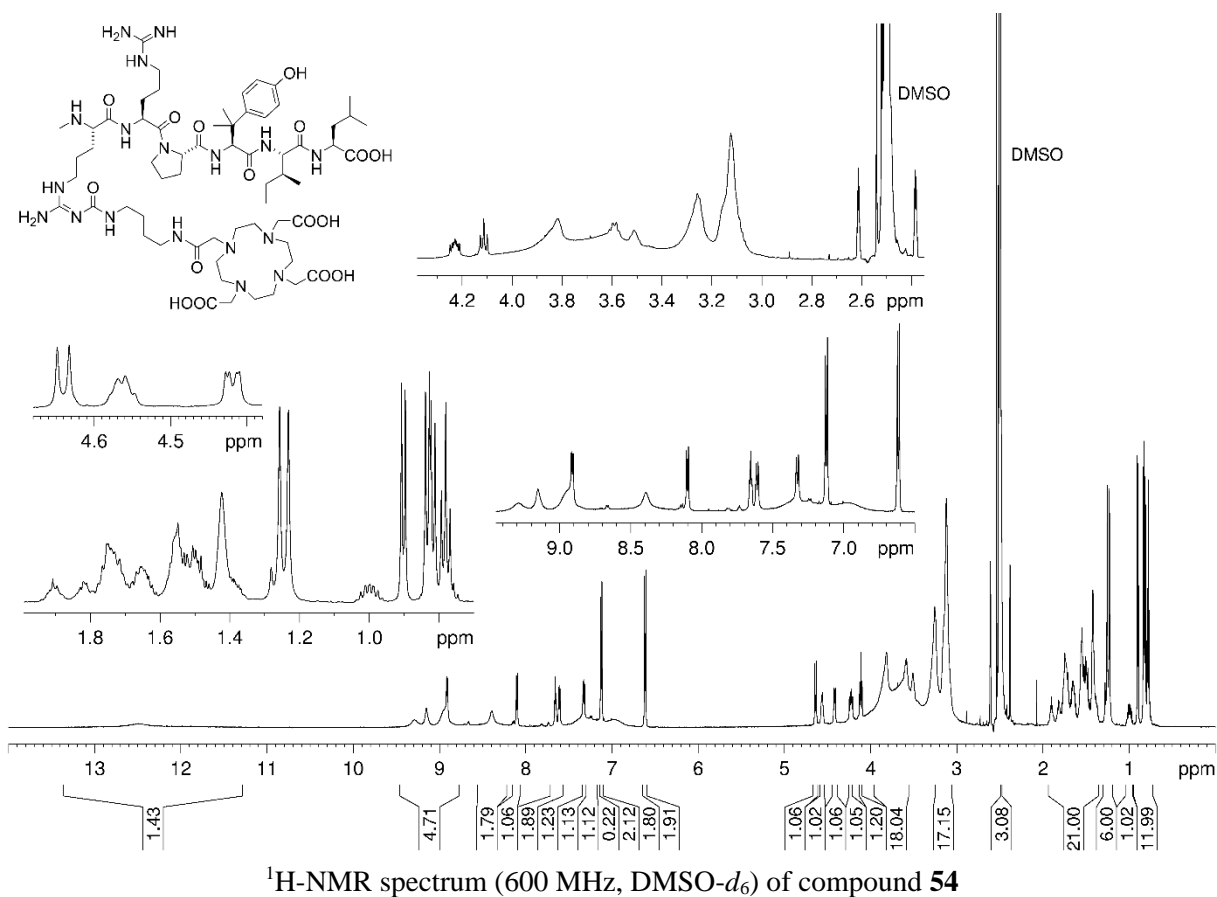

<sup>1</sup>H-NMR spectrum (600 MHz, DMSO-*d*<sub>6</sub>) of compound **54**

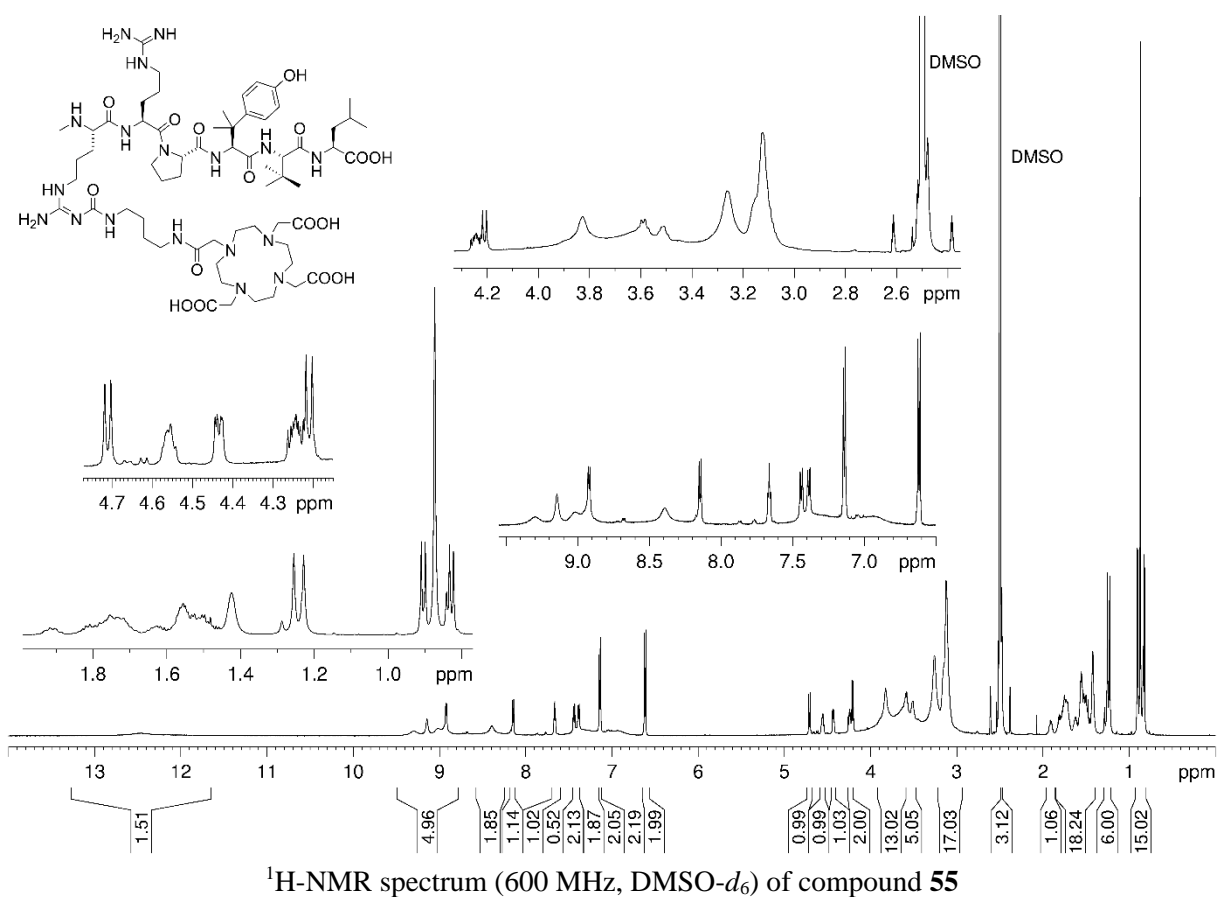

<sup>1</sup>H-NMR spectrum (600 MHz, DMSO-*d*<sub>6</sub>) of compound **55**

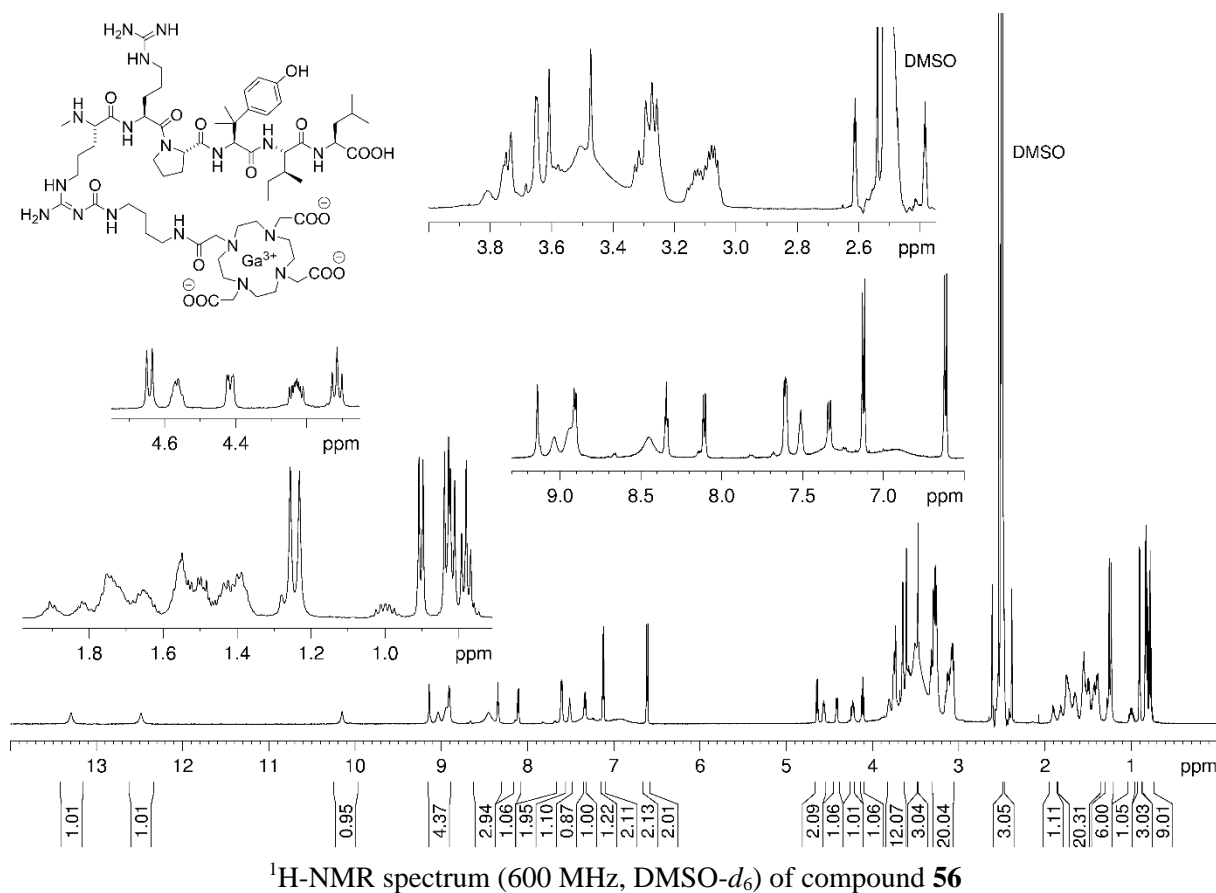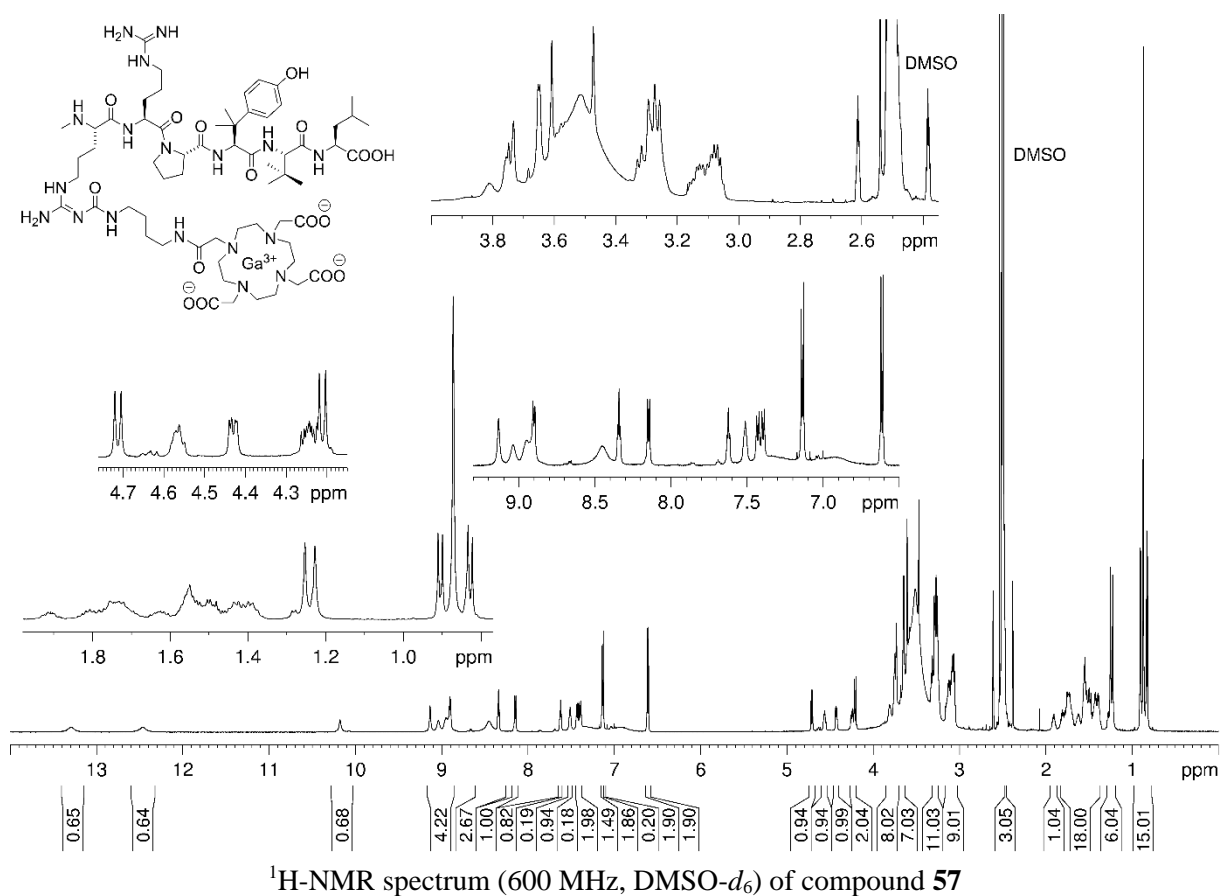

## 5. References

1. Keller, M.; Kuhn, K.K.; Einsiedel, J.; Hübner, H.; Biselli, S.; Mollereau, C.; Wifling, D.; Svobodová, J.; Bernhardt, G.; Cabrele, C.; et al. Mimicking of arginine by functionalized *N*<sup>ω</sup>-carbamoylated arginine as a new broadly applicable approach to labeled bioactive peptides: high affinity angiotensin, neuropeptide Y, neuropeptide FF, and neurotensin receptor ligands as examples. *J Med Chem* **2016**, *59*, 1925-1945, doi:10.1021/acs.jmedchem.5b01495.
2. Schindler, L.; Bernhardt, G.; Keller, M. Modifications at Arg and Ile give neurotensin(8-13) derivatives with high stability and retained NTS<sub>1</sub> receptor affinity. *ACS Med Chem Lett* **2019**, *10*, 960-965, doi:10.1021/acsmchemlett.9b00122.
3. Schindler, L.; Wohlfahrt, K.; Gluhacevic von Krüchten, L.; Prante, O.; Keller, M.; Maschauer, S. Neurotensin analogs by fluoroglycosylation at *N*<sup>ω</sup>-carbamoylated arginines for PET imaging of NTS<sub>1</sub>-positive tumors. *Sci Rep* **2022**, *12*, 15028, doi:10.1038/s41598-022-19296-0.
